# Supplementary material for: Whole Transcriptome Profiling of Maize during Early Somatic Embryogenesis Reveals Altered Expression of Stress Factors and Embryogenesis-Related Genes
Source: PLoS One. 2014 Oct 30;9(10):e111407. doi: 10.1371/journal.pone.0111407 (PMC4214754; doi:10.1371/journal.pone.0111407)
Supplement: Table S1 — Summary data on transcripts detected. A summary of the number of reads mapped for each sample of immature zygotic embryos from two ears of maize inbred line A188 collected at 0, 24, 36, 48 h and one ear collected at 72 h after placement on tissue culture initiation medium. (XLSX) [file pone.0111407.s005.xlsx]

## Sheet: Sheet1
Supplemental Table 1. Summary data on transcripts detected. A summary of the number of reads mapped for each sample of immature zygotic embryos from two ears of maize inbred line A188 collected at 0, 24, 36, 48h and one ear collected at 72 h after placement on tissue culture initiation medium.
Ear	Time point	Read Count	Unique Mapping	Duplicate Mapping	Unmapped	Percent Unique Mapping	Percent Duplicate Mapping	Percent Mapped	Percent Unmapped
Ear 1	0h	13658058	9369648	754081	3534329	0.686016	0.0804813	0.741228	0.258772
Ear 2	0h	12694970	8337899	670398	3686673	0.656788	0.0804037	0.709596	0.290404
Ear 1	24h	15745857	9848683	806567	5090607	0.625478	0.0818959	0.676702	0.323298
Ear 2	24h	10955885	7058441	579969	3317475	0.64426	0.0821667	0.697197	0.302803
Ear 1	36h	16445774	10478756	861399	5105619	0.63717	0.0822043	0.689548	0.310452
Ear 2	36h	23712334	16197689	1335271	6179374	0.683091	0.0824359	0.739403	0.260597
Ear 1	48h	36048894	24978252	2020854	9049788	0.692899	0.0809045	0.748958	0.251042
Ear 2	48h	17467759	12119931	983846	4363982	0.693846	0.0811759	0.750169	0.249831
Ear 1	72h	13827491	9671879	792472	3363140	0.699467	0.0819357	0.756779	0.243221
