# Supplementary material for: Whole Transcriptome Profiling of Maize during Early Somatic Embryogenesis Reveals Altered Expression of Stress Factors and Embryogenesis-Related Genes
Source: PLoS One. 2014 Oct 30;9(10):e111407. doi: 10.1371/journal.pone.0111407 (PMC4214754; doi:10.1371/journal.pone.0111407)
Supplement: Table S2 — Correlation of transcript abundance between biological replicates across time. Pearson's correlation of transcript abundance estimates measured as fragments per kilobase of exon model per million fragments mapped (FPKM) between samples of immature zygotic embryo explants from two maize ears of inbred line A188 collected at 0, 24, 36, 48, and 72 h after placement on tissue culture initiation medium. (XLSX) [file pone.0111407.s006.xlsx]

## Sheet: Sheet1
Supplemental Table 2. Correlation of transcript abundance between biological replicates across time. Pearson's correlation of transcript abundance estimates measured as fragments per kilobase of exon model per million fragments mapped (FPKM) between samples of immature zygotic embryo explants from two maize ears of inbred line A188 collected at 0, 24, 36, 48, and 72 h after placement on tissue cu…
	Ear 1 0h	Ear 2 0h	Ear 1 24h	Ear 2 24h	Ear 1 36h	Ear 2 36h	Ear 1 48h	Ear 2 48h	Ear 1 72h
Ear 1 0h	1	0.974823	0.258674	0.263847	0.501939	0.580643	0.635788	0.64112	0.683508
Ear 2 0h	0.974823	1	0.257029	0.262475	0.488947	0.566724	0.61763	0.633202	0.663999
Ear 1 24h	0.258674	0.257029	1	0.992568	0.773318	0.749389	0.593055	0.585561	0.48675
Ear 2 24h	0.263847	0.262475	0.992568	1	0.780056	0.756408	0.598699	0.591982	0.490362
Ear 1 36h	0.501939	0.488947	0.773318	0.780056	1	0.964333	0.909621	0.869443	0.797375
Ear 2 36h	0.580643	0.566724	0.749389	0.756408	0.964333	1	0.93694	0.925474	0.856924
Ear 1 48h	0.635788	0.61763	0.593055	0.598699	0.909621	0.93694	1	0.970787	0.958729
Ear 2 48h	0.64112	0.633202	0.585561	0.591982	0.869443	0.925474	0.970787	1	0.956581
Ear 1 72h	0.683508	0.663999	0.48675	0.490362	0.797375	0.856924	0.958729	0.956581	1
