# Supplementary material for: Whole Transcriptome Profiling of Maize during Early Somatic Embryogenesis Reveals Altered Expression of Stress Factors and Embryogenesis-Related Genes
Source: PLoS One. 2014 Oct 30;9(10):e111407. doi: 10.1371/journal.pone.0111407 (PMC4214754; doi:10.1371/journal.pone.0111407)
Supplement: Table S3 — Gene expression of reference genes and representative transcript assemblies (RTA) detected in early somatic embryogenesis. Fragments per kilobase of exon model per million fragments mapped (FPKM) of gene transcripts detected in immature zygotic embryo explants of maize in inbred line A188 at 0, 24, 36, 48, and 72 h after placement on tissue culture initiation medium averaged across two biological replicates and gene annotations based on MapMan 5b filtered gene set gene names and annotations for the joint loci representative transcript assemblies (RTAs). (XLSX) [file pone.0111407.s007.xlsx]

## Sheet: Sheet1
Supplemental Table 3. Gene expression of reference genes and representative transcript assemblies (RTA) detected in early somatic embryogenesis. Fragments per kilobase of exon model per million fragments mapped (FPKM) of gene transcripts detected in immature zygotic embryo explants of maize in inbred line A188 at 0, 24, 36, 48, and 72 h after placement on tissue culture initiation medium averaged…
Gene	Chromosome	Left position (bp)	Right position (bp)	0h	24h	36h	48h	72h	MapMan Name	RTA Annotations
GRMZM2G059865	1	4853	9652	80.0406	25.6022	42.4036	64.1516	66.083	protein.degradation.ubiquitin.E3.SCF.SKP
GRMZM5G888250	1	9881	10387	12.0259	3.79925	3.49025	6.17518	5.6787	not assigned.unknown
GRMZM2G093344	1	109518	111769	3.37165	2.41971	3.61273	3.69156	4.13802	not assigned.unknown
GRMZM2G093399	1	136306	138929	8.28019	10.6027	10.388	9.83415	9.78853	not assigned.unknown
GRMZM5G809743	1	144360	144657	8.40888	6.65713	7.55623	8.63867	9.24618	not assigned.unknown
GRMZM5G833153	1	144956	145646	4.24347	2.81402	4.2717	5.00155	5.95404	not assigned.unknown
GRMZM2G306216	1	146264	147500	1.73005	1.63043	1.00138	0.987315	1.90554	protein.degradation.ubiquitin.E3.RING
AC177838.2_FG015	1	161142	161925	6.45693	2.92654	2.43818	3.62148	4.7888	not assigned.unknown
GRMZM2G104572	1	234778	235890	0.102095	0.090721	0.0716804	0.161341	0.0633152	not assigned.unknown
GRMZM5G822187	1	243463	243742	0	0	0	0	0	not assigned.unknown
GRMZM5G815900	1	257025	257371	0	0	0	0	0	not assigned.unknown
GRMZM2G023794	1	264625	270895	0	0.0462135	0	0.0743735	0	secondary metabolism.phenylpropanoids.lignin biosynthesis.PAL
GRMZM2G023863	1	272524	274767	0.0829368	0.0384135	0.187202	0.108718	0.0806373	not assigned.unknown
GRMZM2G137648	1	371974	375908	0	0	0	0	0	PS.lightreaction.cyclic electron flow-chlororespiration
GRMZM2G137697	1	372537	374866	0	0	0	0	0	protein.synthesis.ribosomal protein.prokaryotic.chloroplast.30S subunit.S15
GRMZM2G408834	1	379243	385788	3.3752	2.68859	2.81983	2.62345	3.49341	not assigned.unknown
GRMZM2G108663	1	423620	424483	0	0	0	0	0	not assigned.unknown
AC204887.4_FG003	1	458333	458906	0	0	0	0	0	not assigned.unknown
GRMZM2G471814	1	514920	516015	0	0.06404	0.0782955	0.101304	0	nucleotide metabolism.synthesis.PRS-PP
GRMZM2G330436	1	515996	526846	11.1148	7.2919	8.4797	9.14992	11.4404	not assigned.unknown
GRMZM2G032104	1	644607	652093	25.4453	16.9072	21.7203	19.7782	19.9085	RNA.processing
GRMZM2G333069	1	644610	645388	39.6367	61.6889	3.79643	3.3774	8.32279e-07	not assigned.unknown
GRMZM2G399700	1	676951	682616	7.89998	6.48602	7.42693	7.48248	11.5552	RNA.processing
GRMZM2G703460	1	724192	724645	0	0	0	0	0	not assigned.unknown
GRMZM2G474694	1	833248	837343	0.955296	0.495288	0.897747	1.00133	1.41692	RNA.regulation of transcription.unclassified
GRMZM2G172183	1	985530	993246	4.5382	8.01638	5.80222	5.40362	4.26249	transport.p- and v-ATPases
GRMZM2G073979	1	997213	999824	14.037	15.8901	14.1953	16.3762	15.7787	hormone metabolism.ethylene.signal transduction
GRMZM2G374777	1	1000049	1000789	1.41367	1.7291	2.00169	0.803952	0.722435	not assigned.unknown
GRMZM2G374779	1	1001484	1005319	11.315	26.8025	27.4779	34.0052	29.8129	protein.postranslational modification
GRMZM2G374812	1	1003178	1007065	8.08564	3.72213	6.52293	5.90395	5.96656	transport.sugars
GRMZM2G052586	1	1036798	1042292	16.9459	13.3258	13.1403	15.0741	19.2725	not assigned.unknown
GRMZM2G483779	1	1157710	1158853	11.9837	8.03122	15.9084	13.6866	11.7652	not assigned.unknown
GRMZM2G002121	1	1177193	1178041	23.2386	34.5097	31.1168	35.1978	30.049	misc.oxidases - copper, flavone etc.
GRMZM2G026639	1	1195259	1203566	11.6804	12.1116	12.7134	13.5283	14.2901	not assigned.unknown
GRMZM2G058632	1	1275520	1290031	1.25967	5.51027	2.73689	2.95359	2.54294	not assigned.unknown
GRMZM2G367714	1	1501025	1507458	0	0	0	0	0	DNA.synthesis/chromatin structure
GRMZM2G097229	1	1566914	1568178	4.51675	0.784953	1.80485	2.2388	0.935286	cell wall.modification
GRMZM2G474194	1	1665097	1666489	26.8405	6.98417	9.37378	6.6935	2.81919	cell wall.modification
GRMZM2G703462	1	1754286	1754598	0	0	0	0	0	not assigned.unknown
GRMZM2G161483	1	1762477	1764682	0.448328	0.321648	0.0371889	0.0241598	0	transport.peptides and oligopeptides
GRMZM2G161540	1	1779987	1782907	0.095697	1.77067e-08	0.0262274	0.0363101	1.18796e-07	misc.UDP glucosyl and glucoronyl transferases
AC193500.3_FG003	1	1780237	1781389	1.57842	0.63823	0.194362	0.363715	0.630009	misc.oxidases - copper, flavone etc.
GRMZM2G161560	1	1787685	1789666	235.399	116.606	130.166	114.79	107.745	not assigned.unknown
GRMZM2G079891	1	1857848	1860470	3.43043	0.857595	1.02745	1.08999	1.86504	not assigned.unknown
GRMZM2G379898	1	1876847	1878455	0	0	0	0	0	misc.protease inhibitor/seed storage/lipid transfer protein (LTP) family protein
GRMZM2G060265	1	1955583	1957660	0.316966	0.131192	0.134167	0.218371	0	RNA.regulation of transcription.GRAS transcription factor family
GRMZM2G361164	1	1955787	1957438	6.1818e-09	1.79775e-06	0.0450812	0.0572928	0	RNA.regulation of transcription.GRAS transcription factor family
GRMZM2G060296	1	1962961	1970150	37.4803	74.2978	46.9888	53.3914	51.2458	protein.targeting.secretory pathway.unspecified
GRMZM2G176952	1	1971171	1971873	0	0	0	0	0	not assigned.unknown
GRMZM2G164696	1	2037789	2040079	340.568	174.197	240.809	234.996	226.158	cell.organisation
GRMZM2G703466	1	2042840	2047286	3.46497	2.92656	4.1268	4.5408	4.51697	not assigned.unknown
GRMZM2G114469	1	2087561	2089837	1.34594	1.4692	1.91584	2.25614	2.32663	not assigned.unknown
GRMZM2G114459	1	2090700	2104441	22.412	9.80751	11.6645	12.4153	13.8936	not assigned.unknown
GRMZM2G458423	1	2161369	2168670	0.789505	0.170006	0.33085	0.561545	0.504183	not assigned.unknown
GRMZM2G109725	1	2207876	2212485	9.34633	5.83225	6.22643	6.41338	7.18231	protein.degradation.ubiquitin.E3.SCF.SKP
GRMZM2G410990	1	2221193	2225913	5.64077	1.02685	1.55976	2.26049	1.99676	transport.p- and v-ATPases
GRMZM2G158378	1	2306517	2308141	0	0	0	0	0	not assigned.unknown
GRMZM2G459354	1	2400576	2405041	0	0	0	0	0	not assigned.unknown
GRMZM2G329177	1	2428331	2435658	6.13025	7.69268	7.24392	8.01135	9.35084	protein.postranslational modification
GRMZM2G028870	1	2467010	2469587	0.397863	1.42125	2.15938	1.88164	3.04783	protein.degradation.ubiquitin.E3.RING
GRMZM2G052546	1	2538101	2544683	9.54254	12.0677	8.79045	10.1965	10.4995	major CHO metabolism.degradation.starch.laforin like phosphoglucan phosphatase (SEX4)
GRMZM2G035377	1	2657649	2660198	1.37262	2.84922	2.6048	2.37011	2.14831	cell wall.hemicellulose synthesis.glucuronoxylan
GRMZM2G085691	1	2685918	2692352	6.42839	2.82156	4.29608	4.46434	4.39412	protein.degradation.ubiquitin.E3.RING
GRMZM2G388684	1	2692900	2694270	0	0	0	0.0293915	0	cell wall.modification
GRMZM2G085827	1	2727731	2736340	15.4788	6.54703	7.32824	7.76417	8.3117	development.unspecified
GRMZM2G085872	1	2736649	2741182	1.46292	1.48847	1.88166	2.48012	2.48762	not assigned.unknown
GRMZM2G085885	1	2741607	2750630	1.89343	1.04644	1.54931	2.34474	1.86261	cell.cycle.peptidylprolyl isomerase
GRMZM2G086242	1	2742372	2747035	0.623511	0.207962	0.244982	0.313156	0.234074	not assigned.unknown
GRMZM2G086269	1	2753149	2755628	0.0307444	0	0	0	0	not assigned.unknown
GRMZM2G042552	1	2783893	2786103	5.06627	5.52261	4.56895	5.96779	5.94463	RNA.regulation of transcription.SNF7
GRMZM2G042539	1	2786770	2787850	0.615849	1.23157	0.343289	0.329828	0	not assigned.unknown
GRMZM2G042250	1	2793727	2800641	12.1403	8.94181	15.654	27.2225	33.1638	RNA.regulation of transcription.HB,Homeobox transcription factor family
GRMZM2G041881	1	2801079	2803977	85.1827	67.4545	81.8557	84.3547	86.5033	RNA.regulation of transcription.General Transcription
GRMZM5G802392	1	2841466	2842386	25.8285	132.894	108.313	79.3461	57.9205	not assigned.unknown
GRMZM2G006673	1	2858783	2871425	23.26	17.673	18.5273	20.7188	22.2931	not assigned.unknown
GRMZM2G007025	1	2873513	2876191	3.23453	13.7092	5.54761	5.91783	5.05407	not assigned.unknown
GRMZM2G015384	1	2876245	2896381	67.7173	34.5031	40.1123	51.1318	54.5227	cell.organisation
GRMZM2G436038	1	2908527	2909990	0	0	0	0	0	protein.synthesis.ribosomal protein.prokaryotic.chloroplast.50S subunit.L2
GRMZM2G436286	1	2926713	2928137	0	0	0	0	0	not assigned.unknown
GRMZM2G137366	1	2937204	2942164	5.06045	5.47142	4.19139	4.58567	5.51119	RNA.regulation of transcription.DNA methyltransferases
GRMZM2G137352	1	2956671	2958311	0.447867	0.0834775	0.18865	0.633455	0.505328	RNA.regulation of transcription.unclassified
GRMZM2G564073	1	2996879	2997851	0	0	0	0	0	not assigned.unknown
GRMZM2G137329	1	3000160	3000884	0.241388	4.16477	2.59443	1.3733	2.58737	misc.protease inhibitor/seed storage/lipid transfer protein (LTP) family protein
GRMZM2G137236	1	3009667	3028068	11.1198	11.0022	9.84234	11.0597	12.3783	cell.vesicle transport
GRMZM2G436226	1	3029849	3033965	2.51189	3.13027	2.16869	2.19274	3.53115	RNA.regulation of transcription.PHD finger transcription factor
GRMZM2G314660	1	3077768	3082278	1.24166	2.63097	2.08462	1.39237	1.41118	RNA.regulation of transcription.Trihelix, Triple-Helix transcription factor family
GRMZM2G092232	1	3130453	3136449	18.5301	6.60045	11.8351	20.133	20.6071	cell.organisation
GRMZM2G393062	1	3136850	3137858	38.3286	1.11297	2.48477	1.523	1.83662	not assigned.unknown
GRMZM2G092165	1	3138275	3139738	19.4124	15.555	17.1697	15.2229	15.6077	not assigned.unknown
GRMZM2G124550	1	3178505	3184365	18.5451	20.6646	13.8728	16.6709	21.4463	protein.postranslational modification
GRMZM2G144197	1	3195768	3197587	0.263741	1.46753	1.13825	0.959016	0.867281	protein.degradation.AAA type
GRMZM2G144101	1	3199277	3201120	103.693	67.6909	96.2951	95.1163	76.5242	protein.targeting.mitochondria
GRMZM2G077615	1	3269322	3271219	0.984174	1.49384	1.36018	1.60248	1.55443	misc.UDP glucosyl and glucoronyl transferases
GRMZM2G077669	1	3272428	3276331	11.1553	14.1621	12.0202	13.3719	10.7312	not assigned.unknown
GRMZM2G077760	1	3278524	3279776	7.43799	9.36784	11.7931	8.35277	5.65637	protein.targeting.mitochondria
GRMZM2G077769	1	3280272	3281467	1.64675	3.16322	2.53271	3.63423	3.23178	misc.plastocyanin-like
GRMZM2G077780	1	3281768	3286701	9.58591	9.22497	10.6955	12.5047	14.325	protein.postranslational modification.kinase
GRMZM2G126199	1	3354864	3356892	42.6549	22.1411	11.767	16.27	16.8815	misc.short chain dehydrogenase/reductase (SDR)
GRMZM2G126218	1	3360205	3363923	4.91511	5.58879	4.97283	5.03937	4.39797	not assigned.unknown
GRMZM2G426802	1	3364323	3369043	1.82719	4.66091	4.06585	3.58296	3.45352	not assigned.unknown
GRMZM2G440537	1	3405060	3409879	2.26686	3.27915	3.90399	4.26676	4.55446	development.unspecified
GRMZM2G440562	1	3406974	3409879	2.03616	4.19975	1.15277	0.719207	1.09252	not assigned.unknown
GRMZM2G055880	1	3448054	3451414	17.3622	32.0332	33.1236	26.0875	19.9315	mitochondrial electron transport / ATP synthesis.cytochrome c oxidase
GRMZM2G055698	1	3468643	3470620	0.111081	31.2598	15.101	11.589	10.1443	protein.degradation.serine protease
GRMZM2G703469	1	3548475	3548988	0	0	0	0	0	not assigned.unknown
GRMZM2G062210	1	3554379	3564614	19.6794	14.6175	17.8734	20.3799	17.182	signalling.light.COP9 signalosome
GRMZM2G044388	1	3645522	3648807	15.0142	9.35156	10.4323	10.8014	8.65099	protein.degradation.ubiquitin.E3.SCF.FBOX
GRMZM2G044247	1	3648954	3651846	0.130433	0.281241	0.320641	0.228812	0.374979	amino acid metabolism.synthesis.aspartate family.lysine.dihydrodipicolinate reductase
GRMZM2G088482	1	3664560	3667471	0.386745	3.11972	3.77248	4.61292	3.3931	cell.organisation
GRMZM2G029713	1	3699530	3704319	0.630255	1.04479	1.18009	1.16814	1.28841	not assigned.unknown
GRMZM2G029824	1	3708103	3710619	0.770361	8.04814	3.54833	3.75129	3.20439	protein.targeting.peroxisomes
GRMZM2G320099	1	3710502	3713113	7.7504	5.66827	7.03097	7.19063	7.07477	nucleotide metabolism.deoxynucleotide metabolism.cytosine deaminase
GRMZM2G030173	1	3714425	3715519	12.4141	5.04117	8.09581	8.52689	8.27459	cell wall.modification
GRMZM2G030299	1	3730307	3734425	11.4355	11.2069	8.58449	9.94121	7.23141	not assigned.unknown
GRMZM2G320111	1	3734664	3735389	0	0	0	0	0	hormone metabolism.ethylene.signal transduction
GRMZM2G030567	1	3737628	3742546	1.02718	0.454306	0.46613	0.275427	0.165856	not assigned.unknown
GRMZM2G320117	1	3745037	3746813	0.152135	0	0.0962744	0.0375441	0.0683811	not assigned.unknown
GRMZM2G085909	1	3830540	3834833	74.1544	54.3346	56.2742	53.3708	54.4233	protein.folding
GRMZM2G008327	1	3878456	3884044	21.1705	17.7763	18.9405	21.9601	23.8386	protein.postranslational modification
GRMZM2G008710	1	3883234	3886543	3.43654	6.65196	5.30917	5.39284	4.58689	stress.abiotic
GRMZM2G008773	1	3889594	3890323	10.6883	8.18633	19.38	28.9204	25.9684	cell wall.degradation
GRMZM2G308570	1	3892509	3905875	9.79178	9.16354	9.97963	12.342	12.7855	cell.cycle
GRMZM2G087207	1	4018232	4022920	23.0711	18.791	22.0628	23.5194	23.3542	secondary metabolism.isoprenoids.mevalonate pathway.HMG-CoA synthase
GRMZM2G387837	1	4023201	4025627	4.08231	5.51605	5.30663	4.97815	5.03792	not assigned.unknown
GRMZM2G013634	1	4038301	4040423	14.4202	15.0061	14.2047	15.1399	14.6897	redox.misc
GRMZM2G312438	1	4040448	4046093	0.400102	0.268688	0.348221	0.49825	0.721038	lipid metabolism.lipid degradation.lysophospholipases.phospholipase D
GRMZM2G013986	1	4052733	4055543	25.3574	113.026	38.5487	36.7852	48.6068	protein.degradation.subtilases
GRMZM2G014382	1	4061677	4069808	45.3832	22.4796	25.0771	30.0391	24.3939	not assigned.unknown
GRMZM2G344566	1	4096343	4096733	0	0	0	0	0	not assigned.unknown
GRMZM2G453794	1	4179743	4193885	71.1055	47.3489	55.3569	69.4816	75.3686	minor CHO metabolism.callose
GRMZM2G167568	1	4210620	4212965	3.18881	2.41371	2.78075	2.5583	2.94962	not assigned.unknown
GRMZM2G181153	1	4240569	4241659	686.56	111.512	285.738	318.48	319.673	DNA.synthesis/chromatin structure.histone
GRMZM2G406204	1	4248314	4252340	0	0.0436511	0.334823	0.738087	0.684197	RNA.regulation of transcription.NAC domain transcription factor family
GRMZM2G169402	1	4288064	4290427	1.72273	1.6309	1.48708	1.74639	1.35929	not assigned.unknown
GRMZM2G473389	1	4290981	4293382	0	0	0	0	0	not assigned.unknown
GRMZM2G049216	1	4305745	4308934	3.89	12.1634	8.33193	8.19647	7.14318	cell.motility.eukaryotes.flagellar associated proteins
GRMZM2G049031	1	4306165	4313744	1.55443	3.49092	3.14837	2.93952	2.62442	transport.p- and v-ATPases
GRMZM2G104468	1	4353902	4358491	4.52236	0.724017	1.5843	2.11657	2.40835	RNA.regulation of transcription.unclassified
GRMZM2G303810	1	4438415	4442394	0	0	0.145639	0.079921	0	not assigned.unknown
GRMZM2G136859	1	4445404	4447405	2.27447	1.19693	2.09864	2.80908	2.16732	metal handling.binding, chelation and storage
GRMZM2G082227	1	4547695	4549322	1.49121	3.78412	2.79261	2.45524	2.63746	RNA.regulation of transcription.ABI3/VP1-related B3-domain-containing transcription factor family
GRMZM2G341934	1	4601115	4604608	0.968254	1.97005	1.74184	2.02081	2.51162	misc.peroxidases
GRMZM2G040762	1	4607184	4614592	8.24086	13.8631	10.7106	12.0123	17.1439	RNA.processing.degradation dicer
GRMZM2G105415	1	4715514	4720901	0.855649	1.3101	0.910271	1.88695	2.50758	protein.postranslational modification
GRMZM2G105436	1	4722653	4725234	3.0474	2.18003	2.24238	2.47501	2.18372	tetrapyrrole synthesis.coproporphyrinogen III oxidase
GRMZM2G475289	1	4748611	4750517	0.202656	0.080732	0	0.068573	0	RNA.regulation of transcription.bHLH,Basic Helix-Loop-Helix family
GRMZM2G475296	1	4752171	4752739	0.320705	0	0.0953655	0	0	not assigned.unknown
GRMZM2G176820	1	4757911	4760893	2.78613	2.22067	1.93988	2.14829	1.52833	protein.synthesis.ribosomal protein.prokaryotic.chloroplast.50S subunit.L11
GRMZM2G176840	1	4764678	4766990	8.83507	7.59861	5.04317	5.06385	4.8875	PS.lightreaction.photosystem II.PSII polypeptide subunits
GRMZM2G475380	1	4767326	4772060	8.35064	25.7244	4.62645	2.44846	1.23852	secondary metabolism.flavonoids.dihydroflavonols
GRMZM2G026223	1	4862046	4877625	3.35166	3.541	3.17928	3.45278	4.05303	RNA.regulation of transcription.MADS box transcription factor family
GRMZM2G070047	1	4981300	4984643	16.2282	18.8881	19.4351	21.7861	22.0942	protein.degradation.ubiquitin.E2
GRMZM2G070242	1	4988417	4990702	0	0	0	0.202957	1.10815	DNA.unspecified
GRMZM2G070259	1	4992661	4994875	14.4154	16.7914	26.0688	20.2739	20.8386	RNA.RNA binding
GRMZM2G159427	1	4997169	5002958	5.97265	6.18951	5.43269	4.41584	4.49368	cell.cycle
GRMZM2G159431	1	5009413	5014052	0	0.892632	0.987261	0.642195	0.841261	RNA.regulation of transcription.HB,Homeobox transcription factor family
AC194428.3_FG006	1	5016683	5020549	0	0	0	0	0	not assigned.unknown
GRMZM2G461777	1	5016716	5017577	0	0	0	0	0	not assigned.unknown
AC194428.3_FG007	1	5022108	5023466	0	0	0	0	0	not assigned.unknown
GRMZM2G159470	1	5029600	5031221	0	0	0	0	0	not assigned.unknown
GRMZM2G159477	1	5045579	5047986	8.77908	10.6311	5.05886	3.44579	2.27944	not assigned.unknown
GRMZM2G327059	1	5087123	5093048	0.0412131	0.253989	0.057753	0.226725	0.158548	RNA.regulation of transcription.HB,Homeobox transcription factor family
GRMZM2G165422	1	5244400	5247445	0.581832	6.34315	2.47946	1.63035	2.07226	protein.postranslational modification.kinase.receptor like cytoplasmatic kinase VII
GRMZM2G465680	1	5248292	5249794	0	0	0.0293826	0	0	cell wall.cell wall proteins.LRR
GRMZM5G838828	1	5248331	5249675	0	0	0	0	0	cell wall.cell wall proteins.LRR
GRMZM2G165362	1	5264375	5266337	0	0	0	0	0	not assigned.unknown
GRMZM2G119736	1	5325921	5327918	11.4454	38.4879	22.1083	20.576	22.1738	signalling.receptor kinases.Catharanthus roseus-like RLK1
GRMZM2G552966	1	5336848	5337598	0	0	0.446567	0.1606	0.383605	not assigned.unknown
GRMZM2G119494	1	5345113	5348832	18.4673	2.17614	9.35406	13.3659	6.8489	cell wall.degradation.pectate lyases and polygalacturonases
GRMZM2G119471	1	5347457	5349768	23.3509	28.1711	22.0915	20.9914	17.259	protein.synthesis.ribosomal protein.prokaryotic.chloroplast.50S subunit.L5
GRMZM2G090051	1	5380151	5382574	0.732911	0.711885	0.38285	0.523219	0	secondary metabolism.isoprenoids.carotenoids.carotenoid beta ring hydroxylase
GRMZM2G089976	1	5386770	5394068	14.2845	19.6747	23.1904	21.91	25.3809	not assigned.unknown
GRMZM2G089860	1	5396963	5404397	0	0	0	0	0	lipid metabolism.Phospholipid synthesis
GRMZM2G176604	1	5407597	5411453	0	0	0	0	0	protein.postranslational modification.kinase.receptor like cytoplasmatic kinase V
GRMZM2G176585	1	5412632	5416804	0	0	0	0	0	not assigned.unknown
GRMZM2G176558	1	5434744	5439562	4.24805	7.71295	8.60431	8.75832	9.50334	not assigned.unknown
GRMZM2G176548	1	5441166	5442997	0.365777	0.350601	0.171465	0.0357551	0.189904	not assigned.unknown
GRMZM2G476107	1	5444634	5451321	0	0	0.0313592	0	0	RNA.regulation of transcription.Orphan family
GRMZM2G176521	1	5453302	5456649	0.597428	0.665221	0.811214	0.648078	0.368144	not assigned.unknown
GRMZM2G055737	1	5517358	5518685	0	0.0777185	0.252349	0.275243	0.477384	not assigned.unknown
GRMZM2G055704	1	5530738	5532411	6.83221	5.75441	2.23238	1.11817	1.10622	DNA.repair
GRMZM2G055575	1	5538100	5542785	3.26838	5.45185	2.64703	3.02178	2.19306	protein.postranslational modification
GRMZM2G177508	1	5589064	5590533	0.0707485	0	0	0.052208	0	not assigned.unknown
GRMZM2G325462	1	5628542	5629483	1.86976	3.81989	5.95714	4.39024	3.56973	not assigned.unknown
GRMZM2G025552	1	5631702	5634096	4.93722	4.3923	5.50082	6.30343	4.90202	not assigned.unknown
GRMZM2G025642	1	5635813	5642763	0.055441	0.868302	0.618775	1.35796	1.38533	RNA.regulation of transcription.NAC domain transcription factor family
AC217946.3_FG005	1	5655681	5658417	0	0	0	0	0	not assigned.unknown
GRMZM2G319022	1	5719543	5740638	9.84318	13.2455	14.2429	16.4127	16.8035	RNA.regulation of transcription.putative transcription regulator
GRMZM2G428184	1	5744704	5747988	4.42823	4.10838	4.14809	3.83112	3.59663	RNA.regulation of transcription.bZIP transcription factor family
GRMZM2G129243	1	5747550	5752894	10.1423	5.458	6.23229	6.70197	8.26629	not assigned.unknown
GRMZM2G371137	1	5809797	5814594	2.13306	1.39542	1.04754	1.37583	1.22463	signalling.receptor kinases.leucine rich repeat XI
GRMZM2G040158	1	5820281	5832868	9.83711	10.4793	8.73176	7.64048	6.31272	transport.potassium
GRMZM2G105571	1	5873405	5877213	198.665	237.436	252.505	266.091	237.572	major CHO metabolism.synthesis.starch.transporter
GRMZM2G065718	1	5952986	5954672	3.05271	16.0138	10.2986	9.13534	9.33846	cell wall.cell wall proteins.AGPs.AGP
GRMZM2G180951	1	5987281	6007403	2.55571	2.17715	5.12978	6.324	10.6917	minor CHO metabolism.callose
GRMZM2G057778	1	6018426	6036376	1.43292	1.00951	2.06509	3.18282	5.53893	minor CHO metabolism.callose
GRMZM2G341918	1	6073666	6083779	0.310435	0.286102	0.558253	0.573905	1.16721	minor CHO metabolism.callose
GRMZM2G086707	1	6123907	6125564	0.0354781	0	0	0	0	not assigned.unknown
GRMZM2G448701	1	6155196	6156231	10.7335	1.89051	3.12744	4.69635	4.45697	not assigned.unknown
GRMZM2G448651	1	6156301	6162790	4.19632	2.91562	3.48624	3.32841	3.4491	not assigned.unknown
GRMZM2G143588	1	6170584	6175103	23.9891	12.4566	16.7427	19.6233	21.9976	DNA.synthesis/chromatin structure
GRMZM2G032852	1	6193682	6198903	29.1624	15.2172	9.20697	9.55989	9.82224	signalling.calcium
GRMZM2G321053	1	6198213	6201153	0.863975	0.295322	0.309347	0.0876898	0.287169	not assigned.unknown
GRMZM2G321041	1	6217384	6218408	0.537998	0.122662	0.195719	0	0	protein.degradation.ubiquitin.E3.RING
GRMZM2G032409	1	6220049	6224741	26.8438	25.2544	28.145	26.9217	24.4045	protein.glycosylation
GRMZM2G032219	1	6233826	6237469	0.207604	0.230327	0.163298	0.191557	0.0529129	stress.biotic
GRMZM2G031859	1	6242981	6252588	18.2619	16.6414	15.4269	17.2971	19.4048	cell.division
GRMZM5G826824	1	6353415	6354652	0	0	0	0	0	secondary metabolism.isoprenoids.carotenoids.carotenoid beta ring hydroxylase
GRMZM5G812553	1	6355289	6361707	0	0	0	0	0	lipid metabolism.Phospholipid synthesis
GRMZM2G014366	1	6364464	6368330	0	0	0	0	0	protein.postranslational modification.kinase.receptor like cytoplasmatic kinase VII
GRMZM5G899119	1	6369499	6373659	0	0	0	0	0	not assigned.unknown
GRMZM2G013730	1	6381034	6381450	0	0	0	0	0	not assigned.unknown
GRMZM5G881029	1	6385781	6389497	0	0	0	0	0	not assigned.unknown
GRMZM2G022907	1	6390894	6391309	0	0	0	0	0	not assigned.unknown
GRMZM5G841360	1	6393431	6398875	0	0	0	0	0	RNA.regulation of transcription.Orphan family
GRMZM5G845611	1	6410460	6413123	0.5062	0.714878	1.66553	1.24841	3.69387	PS.calvin cycle.GAP
GRMZM2G008064	1	6422698	6425774	0.491275	0	0	0	0	not assigned.unknown
GRMZM2G008122	1	6430162	6434861	0	0	0	0.005958	0	transport.p- and v-ATPases
GRMZM5G857724	1	6433147	6433516	0	0	0	0	0	transport.p- and v-ATPases
GRMZM5G887276	1	6531689	6536885	1.23447	0.60362	1.04267	0.548037	0.359881	RNA.regulation of transcription.G2-like transcription factor family, GARP
GRMZM2G137312	1	6546907	6550733	88.6469	70.2983	77.7336	66.6	53.2578	mitochondrial electron transport / ATP synthesis.NADH-DH.localisation not clear
GRMZM2G137367	1	6556849	6567830	0	0	0	0	0	RNA.regulation of transcription.Aux/IAA family
GRMZM2G137374	1	6568930	6570605	0	0	0	0	0	RNA.regulation of transcription.bHLH,Basic Helix-Loop-Helix family
GRMZM2G137380	1	6573702	6579904	0	0	0	0	0	misc.cytochrome P450
GRMZM2G092813	1	6782754	6784801	0	0	0.296952	0.0995436	0.105962	lipid metabolism.FA synthesis and FA elongation.acyl coa ligase
GRMZM2G392863	1	6809043	6809867	1.00934	2.68126	2.09504	0.899278	0.28001	not assigned.unknown
GRMZM2G092916	1	6832394	6834338	0	0	0	0.0821979	0	RNA.transcription
GRMZM2G092923	1	6837114	6840429	8.8904	5.17111	4.4512	3.76583	4.15217	nucleotide metabolism.phosphotransfer and pyrophosphatases.adenylate kinase
GRMZM2G392956	1	6841080	6851868	7.71921	5.5914	6.14528	6.56991	7.98248	signalling.calcium
GRMZM2G089056	1	6921002	6925579	0.324701	0.818868	0.672732	0.959922	0.909067	not assigned.unknown
GRMZM2G089092	1	6928505	6931931	8.01142	7.23921	8.92984	10.8365	10.8467	not assigned.unknown
GRMZM2G020548	1	7040785	7046535	4.60037	3.10771	2.9275	3.0099	3.09808	RNA.regulation of transcription.Bromodomain proteins
GRMZM2G409997	1	7062423	7069858	0	0	0	0	0	not assigned.unknown
GRMZM2G109566	1	7076106	7080266	8.02731	2.99946	3.22189	4.18889	3.44653	protein.postranslational modification.kinase.receptor like cytoplasmatic kinase VII
GRMZM2G409976	1	7084568	7086682	0	0.137525	0.258242	0.480182	0.227995	protein.postranslational modification.kinase.receptor like cytoplasmatic kinase VII
GRMZM2G109509	1	7086250	7092180	5.79702	11.3679	9.49954	10.4666	8.55001	RNA.regulation of transcription.NIN-like bZIP-related family
AC191330.3_FG001	1	7113384	7116457	0	0	0	0	0	not assigned.unknown
GRMZM2G090568	1	7160313	7162590	0	0.117637	0	0.151473	0	redox.dismutases and catalases
GRMZM2G090738	1	7164299	7168523	72.1381	73.2555	99.2964	102.615	114.105	protein.synthesis.ribosomal protein.eukaryotic.60S subunit.L5
GRMZM2G057158	1	7192640	7198439	27.5866	15.1363	18.1574	19.3081	19.4239	protein.degradation.ubiquitin.ubiquitin
GRMZM2G040887	1	7243554	7263951	20.5407	19.736	23.3569	24.0818	26.2374	RNA.processing
GRMZM2G132019	1	7296963	7301229	22.7099	21.9704	21.5298	22.8051	22.768	not assigned.unknown
GRMZM2G071349	1	7302138	7302908	1.14201	2.03188	1.00483	1.80714	1.92409	not assigned.unknown
GRMZM2G007441	1	7313311	7314961	0.43834	1.03614	0.404912	0.412612	0.615353	protein.targeting.chloroplast
GRMZM2G096020	1	7341978	7348599	9.10408	36.632	23.9817	20.9578	17.9241	secondary metabolism.phenylpropanoids
GRMZM2G095968	1	7358354	7360673	0.464925	0.672111	0.214789	0.647421	1.05089	cell wall.modification
GRMZM2G399948	1	7389831	7390908	0	0	0	0	0	not assigned.unknown
GRMZM2G099598	1	7396843	7401566	5.96676	13.8971	16.1618	16.8788	18.3097	protein.postranslational modification
GRMZM2G099454	1	7403530	7408184	0.835344	0.333746	1.99959	2.92307	3.55469	stress.biotic
GRMZM2G092719	1	7456719	7458916	57.5744	67.5654	82.386	61.6396	60.4589	protein.synthesis.ribosomal protein.eukaryotic.40S subunit.SA
GRMZM2G059428	1	7488691	7490758	0	1.21671	0.677063	0.194631	0	RNA.regulation of transcription.NAC domain transcription factor family
GRMZM2G003538	1	7550966	7552157	0	0	0	0	0	not assigned.unknown
GRMZM2G110345	1	7560705	7565712	7.70884	7.76502	5.28202	6.35332	5.64407	not assigned.unknown
GRMZM2G410991	1	7566144	7569296	2.25368	105.297	44.2944	28.6385	17.4807	signalling.receptor kinases.DUF 26
GRMZM2G110616	1	7568486	7570697	0	0.503194	0.183833	0.19291	0.0946577	lipid metabolism.FA synthesis and FA elongation.acyl coa ligase
GRMZM2G465806	1	7597566	7601961	0.564874	1.32703	0.736565	0.59233	0.0816291	lipid metabolism.FA synthesis and FA elongation.acyl coa ligase
GRMZM2G048740	1	7686553	7700991	9.84595	7.59169	12.5578	12.1445	10.4295	amino acid metabolism.synthesis.serine-glycine-cysteine group.cysteine.SAT
GRMZM2G093286	1	7714214	7716672	0	0	0	0.0191953	0.199104	misc.cytochrome P450
GRMZM2G119499	1	7824443	7825878	1.02096	0.918283	2.8083	7.00455	7.145	misc.glutathione S transferases
GRMZM2G096269	1	7859736	7861541	1.03692	0.835173	2.43281	4.7587	2.3246	misc.glutathione S transferases
GRMZM2G096247	1	7863548	7864761	0.341797	0.283027	1.26951	5.40654	1.69122	misc.glutathione S transferases
GRMZM2G096153	1	7866606	7868253	21.2214	17.4541	18.8559	23.8319	24.4201	misc.glutathione S transferases
GRMZM2G092592	1	7955263	7955823	0.220969	1.00294	0.875322	0.758848	0.213289	not assigned.unknown
GRMZM2G092481	1	7965592	7969472	4.2501	2.72588	3.02295	4.31219	4.50943	cell.organisation
GRMZM2G173372	1	7996053	7998214	0.298603	0.168272	0.082276	0.0250028	0	RNA.regulation of transcription.bHLH,Basic Helix-Loop-Helix family
GRMZM2G075701	1	8029998	8031796	10.0131	24.5275	22.2844	22.8123	22.2188	hormone metabolism.brassinosteroid.synthesis-degradation.sterols.SMT2
GRMZM2G075870	1	8037340	8039339	0	0	0	0	0	transport.phosphate
GRMZM2G075901	1	8039586	8040405	1.91208	1.27218	1.65917	1.72262	1.61467	not assigned.unknown
GRMZM2G399311	1	8043958	8049083	0.856683	0.710869	0.924848	0.780245	1.2677	RNA.regulation of transcription.SET-domain transcriptional regulator family
GRMZM2G056488	1	8078921	8089614	0.0118014	0	0	0	0	not assigned.unknown
GRMZM2G056377	1	8092362	8095103	12.8255	14.1416	18.6303	18.5492	19.131	not assigned.unknown
GRMZM2G475168	1	8098358	8099146	0.555431	0.60835	1.5412	1.08894	0.743547	not assigned.unknown
GRMZM2G176523	1	8098366	8101975	1.74747	2.1964	1.98211	1.99552	2.21623	not assigned.unknown
GRMZM2G176499	1	8103675	8106330	7.91693	6.93783	7.74817	7.46914	8.25645	stress.abiotic.heat
GRMZM2G475059	1	8112582	8114662	10.046	52.9417	40.3041	31.5262	21.7091	misc.glutathione S transferases
GRMZM2G176397	1	8135963	8147853	37.5161	37.3052	25.9291	25.2718	23.6404	TCA / org. transformation.TCA.aconitase
GRMZM2G587606	1	8188403	8188493	0	0	0	0	0	not assigned.unknown
GRMZM2G474973	1	8205232	8206963	0	0	0	0.0268494	0	protein.synthesis.initiation
GRMZM2G176131	1	8221635	8222451	0.666601	0.297845	0.735634	0.70584	0.492441	cell.organisation
GRMZM2G587569	1	8231685	8231839	0	0	0	0	0	not assigned.unknown
AC155624.2_FG006	1	8264823	8269232	4.46454	6.69621	5.93449	7.24348	6.95375	protein.postranslational modification
GRMZM5G833774	1	8271536	8275361	2.82655	13.8965	9.80205	10.4111	10.2467	protein.postranslational modification
GRMZM5G891266	1	8283444	8289244	4.88725	6.78709	6.52745	8.35978	7.24467	protein.postranslational modification
AC155624.2_FG011	1	8290351	8293428	5.11825	7.17568	5.02154	5.71889	7.39621	not assigned.unknown
GRMZM2G018417	1	8311641	8351849	10.5549	11.8946	14.0007	13.2533	14.5312	transport.sugars
GRMZM2G018410	1	8334641	8337112	0	0	0	0	0	not assigned.unknown
GRMZM2G018579	1	8352065	8353672	3.30488	2.07855	1.764	2.38935	3.93788	not assigned.unknown
GRMZM2G018706	1	8353687	8356340	3.3369	3.29678	4.56363	6.1698	5.98098	transport.unspecified cations
GRMZM2G068265	1	8419265	8422425	0	0	0	0.147159	0	not assigned.unknown
GRMZM2G068336	1	8427099	8428990	0.184275	0	0.0320998	0	0.109468	protein.targeting.mitochondria
GRMZM2G157510	1	8447464	8451013	19.8742	25.6838	20.9312	22.3107	23.752	cell.cycle
GRMZM2G703478	1	8451798	8452254	0	0	0	0	0	not assigned.unknown
GRMZM2G152172	1	8458455	8460510	0	0.052443	0.0326019	0	0	hormone metabolism.brassinosteroid.signal transduction.BZR
GRMZM2G009014	1	8514828	8519625	3.08033	5.9036	5.46761	5.74578	5.92192	not assigned.unknown
GRMZM2G172758	1	8535920	8537767	31.716	6.13326	17.9295	24.696	22.8499	not assigned.unknown
GRMZM2G172751	1	8537786	8541552	0.0492311	0.02301	0	0.0177637	0	not assigned.unknown
AC194863.3_FG007	1	8549322	8551254	0.0228136	0	0	0	0	signalling.G-proteins
AC194863.3_FG006	1	8551950	8553427	0	0	0	0	0	hormone metabolism.abscisic acid.synthesis-degradation.synthesis.9-cis-epoxycarotenoid dioxygenase
GRMZM2G472167	1	8557739	8560823	1.11051	1.57606	0.439768	0.332699	0.662167	transport.peptides and oligopeptides
AC194863.3_FG004	1	8573834	8577024	0	0	0	0	0	not assigned.unknown
GRMZM2G171181	1	8616914	8620091	556.411	416.264	560.505	441.077	438.56	protein.synthesis.ribosomal protein.eukaryotic.60S subunit.L23
GRMZM2G171324	1	8621973	8626677	7.92385	7.15869	6.13721	6.29981	5.63868	not assigned.unknown
GRMZM2G171333	1	8630971	8632081	11.5131	2.78985	2.59972	2.10144	1.92213	not assigned.unknown
GRMZM2G474258	1	8632977	8635760	0.110347	0	0.0774216	0.119446	0	RNA.regulation of transcription.C2C2(Zn) CO-like, Constans-like zinc finger family
GRMZM2G323830	1	8656185	8658213	0	0	0	0.0285179	0	misc.cytochrome P450
GRMZM2G062946	1	8740734	8742850	0	0	0	0	0	misc.cytochrome P450
GRMZM2G057694	1	8787563	8821671	0	0	0	0	0	misc.cytochrome P450
GRMZM2G066805	1	8879224	8881772	0	0	0	0	0	not assigned.unknown
GRMZM2G066860	1	8882639	8885553	3.48237	2.36965	3.34177	3.41951	4.2477	signalling.receptor kinases.misc
GRMZM2G046888	1	8942631	8945089	0.729929	1.18268	1.37971	1.2225	1.14654	RNA.regulation of transcription.MYB domain transcription factor family
GRMZM2G046919	1	8945348	8946887	1.83357	1.87196	2.72708	2.5871	2.36504	not assigned.unknown
GRMZM2G046932	1	8972307	8976833	44.693	24.5801	29.9755	32.4693	35.5875	protein.aa activation.glutamate-tRNA ligase
GRMZM2G047002	1	8978679	8980537	10.6608	8.10485	6.90092	5.30998	3.97131	not assigned.unknown
GRMZM2G450071	1	9045999	9048434	0.556351	0.450481	0.55673	0.408866	0.441419	not assigned.unknown
GRMZM2G149254	1	9049357	9049879	0	0	0	0	0	not assigned.unknown
GRMZM2G149257	1	9050132	9052999	90.163	77.2919	96.8171	75.2013	65.1211	protein.synthesis.ribosomal protein.eukaryotic.60S subunit.L21
GRMZM2G450125	1	9057040	9060022	16.4541	4.19443	4.08148	5.57719	4.50167	major CHO metabolism.degradation.starch.starch cleavage
AC190799.2_FG010	1	9067585	9068314	0	0	0	0	0	hormone metabolism.ethylene.signal transduction
GRMZM2G343767	1	9118010	9119345	0	0	0	0	0	not assigned.unknown
GRMZM2G041899	1	9122819	9125373	0.343315	1.25388	0.435134	0.454651	0.831566	protein.degradation.ubiquitin.E3.RING
GRMZM5G849919	1	9122875	9124362	0.247693	1.61021	0.663556	0.352459	1.20888	protein.degradation.ubiquitin.E3.RING
GRMZM2G355846	1	9188102	9192538	0.213046	3.8035	1.37552	0.877981	1.07404	protein.degradation.ubiquitin.E3.RING
GRMZM2G054111	1	9215737	9217191	0	0	0	0	0	RNA.regulation of transcription.MYB domain transcription factor family
GRMZM5G823004	1	9298928	9302188	4.8136	14.0272	13.9103	18.1191	16.7041	not assigned.unknown
GRMZM5G820122	1	9303131	9306911	53.4956	90.3051	49.7614	47.904	53.1526	transport.ABC transporters and multidrug resistance systems
GRMZM5G860938	1	9358635	9365042	12.6788	10.384	11.6303	12.1685	15.5102	not assigned.unknown
GRMZM5G872399	1	9378736	9379200	0	0	0	0	0	not assigned.unknown
GRMZM2G107686	1	9396237	9398691	0	0.081751	0.102772	0.0159015	0	protein.degradation.subtilases
GRMZM2G107679	1	9424371	9428878	0	0	0	0	0	protein.aa activation.cysteine-tRNA ligase
GRMZM2G107532	1	9433087	9437333	12.1148	11.3352	11.5481	9.86598	11.1321	not assigned.unknown
GRMZM2G407869	1	9440569	9450591	0	0	0	0	0	cell.organisation
GRMZM2G103599	1	9491185	9500155	25.9327	14.4354	13.7876	18.5268	28.2419	cell.organisation
GRMZM2G170567	1	9522788	9541394	27.2217	15.3776	15.834	21.6709	27.3858	cell.organisation
GRMZM2G113174	1	9544231	9573038	8.63929	5.50291	6.09927	7.27772	9.41049	cell.organisation
GRMZM2G113239	1	9563683	9564438	24.8072	25.7233	34.3903	35.4025	31.6461	protein.synthesis.ribosomal protein.prokaryotic.mitochondrion.30S subunit.S19
GRMZM2G415390	1	9580126	9581254	0.450005	0	0.435427	0.123328	0	stress.biotic
GRMZM2G415343	1	9581470	9586948	5.24833	4.5134	5.31265	6.1821	7.01071	not assigned.unknown
GRMZM2G470309	1	9648099	9650113	0	0	0	0	0	misc.UDP glucosyl and glucoronyl transferases
GRMZM5G827810	1	9667957	9669764	0	0	0	0	0	misc.UDP glucosyl and glucoronyl transferases
GRMZM2G435276	1	9673027	9674584	0.154222	0	0.173361	0.239916	0.137026	misc.UDP glucosyl and glucoronyl transferases
GRMZM5G816155	1	9678705	9680949	0	0	0	0	0	cell wall.hemicellulose synthesis
GRMZM5G837318	1	9704588	9748769	0	0	0	0	0	not assigned.unknown
GRMZM2G332548	1	9754388	9757162	0	0	0	0	0	cell wall.hemicellulose synthesis
GRMZM2G009818	1	9805674	9809838	0	0	0.03969	0.159523	0.0335778	signalling.receptor kinases.leucine rich repeat XI
GRMZM2G178571	1	9911960	9922566	1.49361	3.90934	2.78275	3.32714	2.85436	misc.UDP glucosyl and glucoronyl transferases
GRMZM2G062933	1	9955810	9958385	0	0	0	0	0	not assigned.unknown
GRMZM2G062841	1	9989511	9992709	26.5396	25.5347	33.2803	37.3601	36.2374	cell.organisation
GRMZM2G062724	1	10033093	10037438	0	0.395295	0.723469	0.600691	0.96092	protein.degradation.ubiquitin.E3.RING
GRMZM2G062635	1	10045380	10046582	0	0	0	0	0	protein.degradation.autophagy
GRMZM2G038485	1	10088390	10089626	2.21598	3.5115	3.62041	5.03859	6.02625	cell.cycle
GRMZM2G339563	1	10092333	10096672	1.72449	1.79509	1.53445	1.8745	1.54363	cell.cell death.plants
AC186233.3_FG007	1	10193317	10195985	0	0	0	0	0	not assigned.unknown
GRMZM2G087966	1	10203380	10204321	0	0	0	0	0	not assigned.unknown
GRMZM2G087918	1	10222188	10231408	6.65172	5.95298	6.67999	8.70782	8.11846	not assigned.unknown
GRMZM5G873209	1	10311712	10312620	0.496656	0.603114	0.65703	1.07343	0.999727	not assigned.unknown
GRMZM2G117855	1	10360252	10361170	3.89762	2.8017	4.03017	3.8954	3.51642	not assigned.unknown
GRMZM2G418037	1	10361760	10375145	2.04169	6.04351	2.83175	3.52714	4.34433	not assigned.unknown
GRMZM2G439049	1	10381856	10387478	4.85629	13.4646	7.42337	7.3727	9.78391	not assigned.unknown
GRMZM2G086093	1	10397284	10432403	6.18541	17.8721	10.494	11.193	11.309	not assigned.unknown
GRMZM2G142938	1	10486850	10487619	1.82987	4.73208	4.64322	3.18608	4.3216	protein.degradation
GRMZM2G028521	1	10541839	10546402	1.69775	45.6318	45.3617	48.2769	54.1837	not assigned.unknown
GRMZM2G150925	1	10583794	10585796	0.159008	0	0.536527	0.239822	0.866535	not assigned.unknown
GRMZM2G150915	1	10587470	10588999	0.147559	0.682225	0.485639	0.621263	0.577727	not assigned.unknown
GRMZM2G150867	1	10590398	10593290	11.6835	13.5471	12.997	15.7766	16.7433	protein.degradation.ubiquitin.E2
GRMZM2G043799	1	10673928	10679346	0.204211	4.10973	3.24797	2.7929	2.42003	protein.postranslational modification.kinase.receptor like cytoplasmatic kinase IV
GRMZM2G329159	1	10693414	10696796	4.597	3.07962	2.82771	2.97605	3.17435	RNA.regulation of transcription.JUMONJI family
GRMZM2G092483	1	10820297	10821493	0.541667	0.896686	2.67756	3.64807	5.0972	RNA.regulation of transcription.AS2,Lateral Organ Boundaries Gene Family
GRMZM2G092542	1	10826296	10827541	0.871371	0.358368	1.40913	2.97248	1.74207	RNA.regulation of transcription.AS2,Lateral Organ Boundaries Gene Family
GRMZM2G092578	1	10844521	10849281	233.395	126.582	143.466	159.064	168.753	not assigned.unknown
GRMZM2G139834	1	10899453	10901848	0.051206	0	0	0.049891	0	development.unspecified
GRMZM2G358279	1	10960462	10964739	7.1076	4.92817	6.93949	7.70687	7.32138	cell.organisation
GRMZM2G056786	1	10970656	10972234	0	0.118031	0.181729	0.259947	0.123432	protein.degradation.ubiquitin.E3.RING
GRMZM2G056804	1	10977779	10978867	0	0.419789	0.118762	0	0.245428	protein.degradation.ubiquitin.E3.RING
AC198979.4_FG009	1	10989530	10989923	0	0	0	0	0	RNA.regulation of transcription.AP2/EREBP, APETALA2/Ethylene-responsive element binding protein family
GRMZM2G056870	1	10991437	10998924	85.6682	43.5324	48.0173	59.3657	58.1301	protein.degradation.ubiquitin.proteasom
GRMZM2G370985	1	11054944	11058640	1.9382	0.412879	0.422281	0.570569	0.650712	DNA.unspecified
GRMZM2G112728	1	11109399	11113560	0.85314	1.12608	1.06407	1.14103	0.817841	secondary metabolism.isoprenoids.non-mevalonate pathway.geranylgeranyl pyrophosphate synthase
GRMZM2G413315	1	11114483	11114932	0	0	0	0	0	redox.glutaredoxins
GRMZM2G413290	1	11124640	11132607	0	0	0	0	0	not assigned.unknown
GRMZM2G112640	1	11168720	11175605	33.1487	19.2023	19.5267	21.1708	20.2399	protein.targeting.mitochondria
GRMZM2G070087	1	11211041	11213027	0	0	0	0	0	transport.phosphate
GRMZM2G100707	1	11239172	11245581	18.8078	15.4306	14.6912	17.8465	17.3973	not assigned.unknown
GRMZM2G401342	1	11296801	11299651	0	0.0175452	0	0	0	RNA.regulation of transcription.JUMONJI family
AC209858.4_FG004	1	11301151	11301835	23.8905	17.7362	9.94757	14.4287	14.6115	misc.GCN5-related N-acetyltransferase
GRMZM2G703487	1	11358813	11359340	0	0	0	0	0	not assigned.unknown
AC209858.4_FG003	1	11359710	11362566	0	0	0	0	0	RNA.regulation of transcription.SET-domain transcriptional regulator family
AC209858.4_FG002	1	11391254	11397247	19.4075	14.8075	18.3355	16.9256	17.548	development.unspecified
GRMZM2G703490	1	11399962	11402823	36.9522	28.0161	27.487	44.6762	59.1515	cell.division
GRMZM5G863105	1	11414174	11447211	0	0	0	0	0	signalling.G-proteins
GRMZM2G086163	1	11475016	11477144	152.976	2.62715	3.94212	3.1974	3.58102	metal handling.binding, chelation and storage
GRMZM2G086072	1	11481330	11488611	8.95911	6.57645	6.91999	6.93907	7.68288	RNA.regulation of transcription.E2F/DP transcription factor family
GRMZM2G122816	1	11524860	11526732	0.0372136	0.069527	0.0542381	0.0272614	0.0716903	misc.peroxidases
GRMZM2G122787	1	11528521	11534033	5.85014	7.53823	5.47985	6.10863	5.02422	secondary metabolism.phenylpropanoids.lignin biosynthesis.4CL
GRMZM2G315812	1	11578178	11592296	0	0	0.0239115	0	0	protein.postranslational modification
GRMZM2G315806	1	11689364	11692759	3.39349	3.50127	4.38243	4.68659	4.27606	protein.aa activation.pseudouridylate synthase
GRMZM2G018080	1	11694095	11695718	5.04669	7.40812	8.65801	7.32178	8.22258	protein.aa activation.pseudouridylate synthase
GRMZM2G018068	1	11760797	11778347	2.53328	1.53571	1.84652	2.28784	2.839	cell.organisation
AC191040.2_FG002	1	11788149	11789504	0	0.074891	0.162762	0.210238	0	not assigned.unknown
GRMZM2G445783	1	11790333	11793656	7.37284	5.7481	6.81934	7.9858	9.28105	cell.organisation
GRMZM2G173826	1	11850954	11851995	0	0	0.059112	0	0.578933	cell wall.modification
GRMZM2G073373	1	11881677	11883099	0	0	0.118213	0.432539	0.394208	cell wall.modification
GRMZM2G140339	1	11910893	11943975	8.12045	17.8345	15.0168	12.9414	11.3896	not assigned.unknown
GRMZM2G141624	1	11944114	11945293	0.0539295	0	0	0.0407279	0.102991	metal handling.binding, chelation and storage
GRMZM2G141636	1	11946512	11952310	10.8669	18.9721	13.8046	13.9817	13.0578	transport.metal
GRMZM2G027821	1	11982319	11987243	13.7567	9.91017	12.7277	14.9676	15.211	signalling.receptor kinases.DUF 26
GRMZM5G813886	1	11987435	11993737	1.69878	1.74635	2.45099	2.85494	3.36698	transport.ABC transporters and multidrug resistance systems
GRMZM2G000737	1	12089722	12097421	0	0	0	0	0	amino acid metabolism.synthesis.aromatic aa.chorismate.3-deoxy-D-arabino-heptulosonate 7-phosphate synthase
GRMZM2G000749	1	12099072	12107130	12.0385	19.1848	14.1195	16.1517	16.7974	DNA.synthesis/chromatin structure
GRMZM2G300801	1	12140828	12142573	119.925	247.483	201.462	126.139	98.463	amino acid metabolism.synthesis.serine-glycine-cysteine group.serine.phosphoserine aminotransferase
GRMZM2G000823	1	12146188	12150797	28.5114	25.8199	26.0955	29.2401	32.0387	protein.synthesis.initiation
GRMZM2G075958	1	12151603	12153084	0.141782	0.095356	0.0418586	0.104822	0.137627	not assigned.unknown
GRMZM2G076062	1	12165410	12170135	53.6055	85.8318	74.6286	78.1693	82.0097	not assigned.unknown
GRMZM2G377787	1	12175685	12176778	0.203676	2.42559e-197	0.0641035	0.040455	4.55807e-276	protein.degradation.subtilases
GRMZM2G377780	1	12175685	12186031	1.87726	3.49477	3.58359	3.39909	3.05463	protein.degradation.subtilases
GRMZM2G076423	1	12185736	12189286	5.3589	17.2148	12.4122	10.6995	8.60758	protein.postranslational modification.kinase.receptor like cytoplasmatic kinase VII
GRMZM2G397339	1	12202088	12208600	0.0323167	0	0	0	0	not assigned.unknown
GRMZM2G096252	1	12211016	12211622	0	0.22632	0	0	0	not assigned.unknown
GRMZM2G472236	1	12248907	12249912	0.935483	2.25755	1.92245	3.93345	3.62902	development.late embryogenesis abundant
GRMZM2G169747	1	12250363	12252005	3.20535	4.57801	4.30762	4.32752	6.12595	not assigned.unknown
GRMZM2G472266	1	12254262	12255821	46.6237	4.7067	1.48318	2.08904	2.20566	stress.abiotic.heat
GRMZM2G038982	1	12309302	12316794	1.49136	1.70131	1.33391	1.33716	1.57264	protein.postranslational modification
GRMZM2G453148	1	12334278	12337098	0	0	0	0	0	not assigned.unknown
GRMZM2G453139	1	12337465	12338437	0.289849	0	0.0580975	0	0	not assigned.unknown
GRMZM2G453111	1	12343877	12348542	2.50835	1.92101	2.02222	2.70839	3.54974	RNA.processing.RNA helicase
GRMZM2G154211	1	12351735	12357474	0.26499	0.087124	0.106736	0	0	transport.sulphate
GRMZM2G574383	1	12423390	12424043	0.0746865	0	0.10339	0.200565	0.142542	not assigned.unknown
GRMZM2G154119	1	12427850	12430405	2.93337	2.6505	3.5947	3.19303	3.8103	DNA.synthesis/chromatin structure
GRMZM2G154087	1	12433003	12437683	4.25661	4.1546	4.50756	5.11602	4.87699	not assigned.unknown
GRMZM2G453001	1	12437801	12445450	7.83824	4.22146	4.20307	5.04732	6.17468	RNA.regulation of transcription.unclassified
GRMZM2G703497	1	12454141	12454846	0	0	0	0	0	not assigned.unknown
GRMZM2G452996	1	12464297	12466671	0	0	0	0.0402221	0	RNA.regulation of transcription.bHLH,Basic Helix-Loop-Helix family
GRMZM2G154036	1	12481108	12487153	1.067	9.20134	3.58391	1.96882	2.79372	not assigned.unknown
GRMZM2G166445	1	12497532	12499316	1.44871	0.67888	0.683366	0.652826	0.708849	stress.abiotic.unspecified
GRMZM2G165998	1	12514730	12519380	68.5558	72.0171	93.7772	111.16	93.0396	metal handling.regulation
GRMZM2G165972	1	12519909	12522234	1.10109	0.101187	0.0253771	0.0400107	0	stress.abiotic.heat
GRMZM5G880418	1	12578531	12581121	0	0	0	0	0	not assigned.unknown
GRMZM2G480386	1	12660625	12663186	0.099104	0	0	0	0	misc.oxidases - copper, flavone etc.
GRMZM2G056231	1	12822230	12823464	77.6646	32.5157	79.9992	69.2009	63.1948	DNA.synthesis/chromatin structure.histone
GRMZM5G837981	1	12833763	12834168	0	0	0	0	0	not assigned.unknown
GRMZM2G136081	1	12852423	12854268	0.714294	0	0.050166	0.312378	0.263209	not assigned.unknown
GRMZM2G136088	1	12855498	12856242	0	0	0	0	0	not assigned.unknown
GRMZM2G031790	1	12944094	12947312	0.520486	5.8048	2.78474	2.2034	0.953592	lipid metabolism.FA synthesis and FA elongation.beta ketoacyl CoA synthase
GRMZM2G031718	1	12949576	12952951	2.2556	2.50103	2.81465	3.08068	3.00739	not assigned.unknown
GRMZM2G172448	1	12971832	12976508	25.6642	32.0938	28.557	23.5602	22.8345	not assigned.unknown
GRMZM2G172410	1	12976787	12986045	7.75957	3.31912	3.40148	2.79211	2.92745	not assigned.unknown
GRMZM2G172322	1	12987101	12993471	24.3984	22.236	24.1443	22.0797	20.4621	redox.ascorbate and glutathione.glutathione
AC195260.2_FG007	1	13031895	13034701	0	0	0	0	0	not assigned.unknown
AC186417.3_FG004	1	13072884	13074762	0	0	0	0	0	not assigned.unknown
AC186417.3_FG006	1	13087619	13088273	0	0	0	0	0	not assigned.unknown
GRMZM2G181497	1	13131599	13132892	0	0	0	0	0	DNA.synthesis/chromatin structure.histone
GRMZM2G541687	1	13210613	13213266	6.9937	6.30601	7.03645	6.42202	7.29851	not assigned.unknown
GRMZM2G008627	1	13298019	13300351	0	0	0	0	0	misc.beta 1,3 glucan hydrolases
GRMZM2G008696	1	13303867	13305755	0	0	0	0	0	transport.misc
GRMZM2G703500	1	13326088	13326464	0	0	0	0	0	not assigned.unknown
GRMZM2G377311	1	13357631	13372635	12.2865	9.33686	10.857	12.1122	13.3142	cell.cycle
AC187207.3_FG006	1	13368621	13370295	0.106692	0.132295	0.119655	0.0840487	0.188317	not assigned.unknown
GRMZM2G061812	1	13375087	13381307	0	0	0	0	0	transport.ammonium
AC210834.4_FG005	1	13400859	13401093	0	0	0	0	0	not assigned.unknown
AC210834.4_FG006	1	13404982	13405210	0	0	0	0	0	not assigned.unknown
GRMZM2G103292	1	13445370	13453136	0	0	0	0	0	not assigned.unknown
AC210834.4_FG011	1	13453712	13453940	0	0	0	0	0	not assigned.unknown
AC210834.4_FG012	1	13466279	13466513	0	0	0	0	0	not assigned.unknown
AC210834.4_FG013	1	13470891	13471119	0	0	0	0	0	not assigned.unknown
AC210834.4_FG009	1	13505309	13505540	0	0	0	0	0	not assigned.unknown
GRMZM2G169320	1	13536596	13540215	4.96613	5.89981	7.26383	7.15728	7.54648	major CHO metabolism.degradation.sucrose.fructokinase
GRMZM2G169295	1	13550460	13550783	0	0	0	0	0	not assigned.unknown
GRMZM2G169280	1	13587325	13589275	3.05981	2.00802	1.75981	2.06636	2.19924	hormone metabolism.salicylic acid.synthesis-degradation
GRMZM2G470438	1	13593085	13605223	13.432	4.45233	7.20653	8.45085	9.64761	DNA.synthesis/chromatin structure
GRMZM2G004641	1	13641525	13645372	0	1.05126	0.686296	0.515542	0.761971	RNA.regulation of transcription.HB,Homeobox transcription factor family
GRMZM2G417455	1	13683399	13689639	28.7812	20.5266	22.737	28.535	31.7407	misc.gluco-, galacto- and mannosidases
GRMZM2G407396	1	13742878	13745517	1.86716	1.3924	2.22788	1.97377	2.54686	stress.abiotic.drought/salt
GRMZM2G314133	1	13787556	13805454	12.6575	14.9405	13.507	12.0626	13.8192	protein.degradation.ubiquitin
GRMZM2G037912	1	13864632	13866861	0	0	0	0	0	cell.vesicle transport
GRMZM2G327695	1	13910440	13911123	0	0	0	0	0	not assigned.unknown
GRMZM2G027626	1	13910440	13911564	0.077976	0	0	0	0	not assigned.unknown
GRMZM2G123986	1	13991175	13993273	10.8664	6.34518	4.91519	2.43967	1.73576	development.unspecified
GRMZM2G556515	1	13996236	13997167	0	0.0469861	0	0.0188716	0	not assigned.unknown
GRMZM2G124042	1	14031386	14033776	0	0	0	0	0	lipid metabolism.Phospholipid synthesis
GRMZM2G124051	1	14095040	14101632	10.5061	11.6768	10.3476	12.7773	12.4744	RNA.regulation of transcription
GRMZM5G850455	1	14103039	14104361	79.3675	24.7494	22.7705	13.1818	12.578	misc.protease inhibitor/seed storage/lipid transfer protein (LTP) family protein
GRMZM2G124143	1	14105160	14106822	39.2884	36.75	49.9965	39.4348	40.932	protein.synthesis.ribosomal protein.eukaryotic.40S subunit.S28
GRMZM2G424020	1	14113782	14117401	0	0	0	0	0	signalling.calcium
GRMZM2G115131	1	14165938	14169755	1.62862	2.682	4.57659	4.60356	4.46394	not assigned.unknown
GRMZM2G315601	1	14258332	14259045	1.78066	0	0	0	0	not assigned.unknown
GRMZM2G046086	1	14288358	14288941	0.194253	0	0	0	0	not assigned.unknown
GRMZM2G140302	1	14301649	14302205	0.307736	0	0	0	0	not assigned.unknown
GRMZM2G417835	1	14384993	14386612	0.230289	0	0	0	0	not assigned.unknown
GRMZM2G112793	1	14406149	14409113	39.6061	23.0427	25.5917	36.3803	43.9277	protein.postranslational modification
GRMZM2G412674	1	14409461	14413333	2.52838	2.24683	2.11045	2.41283	4.129	protein.degradation.ubiquitin.E3.SCF.FBOX
GRMZM2G063287	1	14449793	14451164	10.7882	30.5068	18.7454	16.4542	10.2845	not assigned.unknown
GRMZM2G362960	1	14452577	14454015	0	0	0	0.118193	0	not assigned.unknown
GRMZM2G362942	1	14486213	14489795	2.10651	3.24981	3.10302	3.37669	3.68332	not assigned.unknown
GRMZM2G389769	1	14496753	14498353	0	0	0	0.0388751	0	redox.thioredoxin
GRMZM2G091822	1	14506334	14508661	0.291507	0.055936	0	0.0595195	0	misc.cytochrome P450
GRMZM2G091916	1	14509270	14511175	9.48767	2.1423	4.45912	5.56501	5.89738	RNA.regulation of transcription.SET-domain transcriptional regulator family
GRMZM2G091921	1	14548247	14551029	35.9808	26.6234	36.9851	32.8041	38.9159	protein.synthesis.ribosomal protein.prokaryotic.unknown organellar.50S subunit.L32
GRMZM2G026807	1	14624230	14639380	3.04764	9.96175	6.01883	5.75176	5.46061	PS.calvin cycle.RPE
GRMZM2G136113	1	14674719	14683555	7.72322	3.13291	3.43311	4.27989	4.29961	hormone metabolism.auxin.induced-regulated-responsive-activated
GRMZM2G464818	1	14779951	14781468	0.778926	0.804018	1.17104	0.850353	0.830717	not assigned.unknown
GRMZM5G857303	1	14803264	14804370	5.61232	3.38438	6.33545	7.24015	8.43412	cell wall.cellulose synthesis
GRMZM2G162725	1	14804661	14809417	8.80373	7.97248	8.39225	7.8911	8.23307	cell.vesicle transport
GRMZM2G162749	1	14850870	14853754	0.197601	1.05297	1.1123	1.49494	0.934204	RNA.regulation of transcription.C2C2(Zn) DOF zinc finger family
GRMZM2G162764	1	14858515	14863230	2.72891	1.30854	1.46007	1.92182	1.50186	DNA.synthesis/chromatin structure
GRMZM2G162776	1	14894389	14899485	11.709	14.8096	13.5541	13.0244	12.9769	tetrapyrrole synthesis.unspecified
GRMZM2G162800	1	14922353	14927646	3.08973	3.29666	2.21073	2.72345	2.66773	protein.degradation
GRMZM2G162814	1	14940656	14943335	18.9222	40.8708	26.9761	24.3287	21.1861	not assigned.unknown
GRMZM2G139963	1	14958683	14961640	0.223874	0.0818085	0.146656	0.111894	0.0731297	RNA.regulation of transcription.HB,Homeobox transcription factor family
GRMZM2G034283	1	15068244	15069580	0.0888905	0	0	0	0	redox.glutaredoxins
GRMZM2G034302	1	15069802	15075192	4.17675	17.8254	21.0684	33.559	15.1258	transport.sugars.sucrose
GRMZM5G851734	1	15102342	15103778	0	0	0	0	0	not assigned.unknown
GRMZM2G035128	1	15105139	15106282	0	0	0	0.0281345	0.146559	not assigned.unknown
GRMZM2G035156	1	15133982	15136082	0	0	0	0	0	RNA.regulation of transcription.bHLH,Basic Helix-Loop-Helix family
GRMZM2G035243	1	15168788	15171560	3.30624	35.362	27.795	30.2631	31.8356	protein.degradation.ubiquitin.E3.SCF.FBOX
GRMZM2G333777	1	15183623	15185404	0	0	0	0	0	not assigned.unknown
GRMZM5G849989	1	15183808	15185394	0	0	0	0	0	not assigned.unknown
GRMZM2G333798	1	15207312	15208625	0.150794	0.0454444	0.0280862	1.9994e-07	3.92963e-07	not assigned.unknown
GRMZM5G853974	1	15207702	15208625	0.130576	0	0	0.0618492	0.106628	not assigned.unknown
GRMZM2G159456	1	15268454	15269892	2.41946	16.6862	37.4807	78.2394	73.1661	RNA.regulation of transcription.bHLH,Basic Helix-Loop-Helix family
GRMZM2G124353	1	15353245	15356638	37.9306	212.236	102.01	103.628	89.2206	amino acid metabolism.synthesis.central amino acid metabolism.alanine.alanine-glyoxylate aminotransferase
GRMZM2G075459	1	15414786	15415199	152.885	8.17762	20.0073	16.3353	17.6361	not assigned.unknown
GRMZM2G022363	1	15474139	15478436	0	0.110767	0.0672842	0.0901248	0.294297	not assigned.unknown
GRMZM2G406601	1	15491757	15493149	0	3.68769	2.27949	1.17203	2.37232	signalling.receptor kinases.DUF 26
GRMZM2G303361	1	15499296	15499810	0	0.592611	1.6963	2.91277	2.11485	not assigned.unknown
GRMZM2G021498	1	15511501	15516460	5.54465	1.62303	3.14092	9.79295	13.7844	protein.degradation.ubiquitin.E3.RING
GRMZM2G000199	1	15525262	15525610	0	0	0	0	0	not assigned.unknown
GRMZM2G378130	1	15611205	15613584	0	0	0	0	0	not assigned.unknown
GRMZM2G142557	1	15727313	15736121	43.7077	25.1878	28.9849	35.499	39.0648	RNA.regulation of transcription.unclassified
GRMZM2G142609	1	15736470	15739482	7.00723	1.09456	3.30429	4.12867	3.65121	not assigned.unknown
GRMZM2G119852	1	15773795	15778609	23.4123	31.7253	29.9924	25.9874	24.8352	nucleotide metabolism.synthesis.purine.adenylosuccinate synthase
GRMZM2G419901	1	15773926	15774892	0	0	0	0	0	RNA.regulation of transcription.AP2/EREBP, APETALA2/Ethylene-responsive element binding protein family
GRMZM2G119933	1	15779185	15785411	4.41638	3.74524	5.01921	5.01643	5.75719	RNA.processing
GRMZM2G419938	1	15786438	15787328	5.39592	0.953224	1.92837	2.27598	2.96291	not assigned.unknown
GRMZM2G000686	1	15806191	15809456	90.0523	8.46562	22.3938	41.2489	35.3382	RNA.regulation of transcription.CCAAT box binding factor family, HAP2
GRMZM2G000741	1	15906928	15909214	19.5225	1.75866	2.06978	2.27513	2.96446	transport.metabolite transporters at the mitochondrial membrane
GRMZM2G156486	1	15990465	15997559	12.1949	14.8149	12.5405	13.5468	12.3447	misc.nitrilases, *nitrile lyases, berberine bridge enzymes, reticuline oxidases, troponine reductases
GRMZM2G178852	1	16046805	16048140	0.240512	0.274456	0.267054	0.254101	0.293716	not assigned.unknown
GRMZM2G703504	1	16064171	16068753	0	0	0	0	0	not assigned.unknown
GRMZM2G399072	1	16118861	16123269	36.0524	15.3489	12.1217	8.51291	4.88792	RNA.regulation of transcription.AP2/EREBP, APETALA2/Ethylene-responsive element binding protein family
GRMZM2G012102	1	16177025	16178797	4.24735	1.28224	1.09814	1.49517	1.39125	not assigned.unknown
GRMZM2G012216	1	16199939	16210076	3.45301	2.81443	3.56898	4.85816	5.53508	RNA.regulation of transcription.PHD finger transcription factor
AC226243.1_FG003	1	16332685	16333330	8.23477	0.647958	2.46852	3.9442	5.92258	not assigned.unknown
GRMZM5G855347	1	16332685	16338873	7.27287	7.66254	6.51349	8.50682	8.37328	transport.metal
GRMZM2G064663	1	16347571	16349061	1.17599	0.545657	0.551188	0.672148	1.06376	not assigned.unknown
GRMZM2G064732	1	16349085	16357022	32.001	25.3707	29.6307	28.8501	29.5404	signalling.G-proteins
GRMZM2G080524	1	16370351	16372880	0.214895	2.12859	2.37943	2.34476	1.98463	not assigned.unknown
GRMZM2G080586	1	16374771	16378386	4.92277	0.506293	1.0701	1.14204	1.88002	not assigned.unknown
GRMZM2G016443	1	16436082	16436786	0	0	0	0	0	stress.abiotic.unspecified
GRMZM2G175164	1	16468413	16473940	0.04565	0.42903	0.715387	0.65195	0.176186	protein.postranslational modification.kinase.receptor like cytoplasmatic kinase VII
GRMZM2G017616	1	16574645	16581541	8.30138	8.63811	6.9074	7.57251	6.75737	hormone metabolism.jasmonate.synthesis-degradation.lipoxygenase
GRMZM2G319057	1	16587189	16588096	0	0.143648	0.155535	0	0	not assigned.unknown
GRMZM2G017254	1	16595442	16603430	9.68628	15.6103	14.2562	14.3763	15.6386	DNA.synthesis/chromatin structure
GRMZM2G016511	1	16603598	16606666	96.564	69.5391	80.2637	94.4891	95.2652	protein.degradation.ubiquitin.proteasom
AC196394.3_FG002	1	16626948	16628169	0.693394	0.137558	0.431022	0.442047	0.206343	not assigned.unknown
GRMZM2G045979	1	16694487	16698692	0.328824	0.0756024	0.183497	0.200838	0.2333	not assigned.unknown
GRMZM2G343157	1	16776988	16778136	0.10359	0	0.158716	0.0665195	0	not assigned.unknown
GRMZM5G838098	1	16783281	16784714	0.316947	38.8647	7.34242	4.71676	3.31726	not assigned.unknown
AC177911.4_FG005	1	16790123	16790687	0	0	0	0	0	not assigned.unknown
GRMZM2G445634	1	16792358	16793281	9.75546	26.0441	6.59933	4.23199	4.60531	RNA.regulation of transcription.C2C2(Zn) CO-like, Constans-like zinc finger family
GRMZM2G445630	1	16796625	16797380	0.236471	0.240371	0.129526	0.142715	0	not assigned.unknown
GRMZM2G147920	1	16798863	16801067	2.31404	2.56463	2.98967	2.23677	2.7227	not assigned.unknown
GRMZM2G147910	1	16802186	16803301	0.307325	0.443371	0.63787	0.77133	0.585053	not assigned.unknown
GRMZM2G445602	1	16822674	16826498	15.0664	30.1638	17.5671	16.2506	17.8633	lipid metabolism.FA synthesis and FA elongation.beta ketoacyl CoA synthase
GRMZM2G445588	1	16826758	16830080	0	0	0	0	0	not assigned.unknown
GRMZM2G148855	1	16952620	16973487	1.84112	2.39656	1.02031	0.846599	0.875512	not assigned.unknown
GRMZM2G000427	1	17015717	17018487	0	0	0.20629	0	0	misc.oxidases - copper, flavone etc.
GRMZM2G390358	1	17133362	17135642	0	0	0	0	0	protein.degradation.subtilases
GRMZM2G061591	1	17181471	17182720	0	0	0	0	0	DNA.synthesis/chromatin structure.retrotransposon/transposase.hat-like transposase
GRMZM2G097434	1	17241147	17260824	5.15893	2.6026	2.86094	3.49541	4.06186	signalling.phosphinositides
GRMZM2G145308	1	17325365	17335709	0	0	0	0	0	protein.synthesis.ribosomal protein.eukaryotic.40S subunit.SA
GRMZM2G115105	1	17383725	17395138	0.442758	1.3392	1.26912	1.57218	2.03122	transport.misc
GRMZM2G115182	1	17408929	17412458	37.005	37.2469	42.5482	47.0525	48.2906	protein.synthesis.initiation
GRMZM2G129674	1	17462083	17463751	140.102	24.3788	36.263	34.3928	40.9752	RNA.regulation of transcription.AP2/EREBP, APETALA2/Ethylene-responsive element binding protein family
GRMZM2G018984	1	17493459	17495464	0.304264	0.14895	0.122903	0.325622	0.490134	RNA.regulation of transcription.AP2/EREBP, APETALA2/Ethylene-responsive element binding protein family
AC206951.3_FG014	1	17511586	17512069	0	0	0	0	0	not assigned.unknown
AC206951.3_FG016	1	17519642	17520458	0	0.373173	0.155568	0.588488	0	RNA.regulation of transcription.AP2/EREBP, APETALA2/Ethylene-responsive element binding protein family
AC206951.3_FG017	1	17526390	17527311	19.6248	1.76976	0.3368	1.18947	1.17827	RNA.regulation of transcription.AP2/EREBP, APETALA2/Ethylene-responsive element binding protein family
GRMZM2G015234	1	17617846	17621006	0	0	0	0	0	not assigned.unknown
GRMZM2G496991	1	17624742	17625481	0	0	0	0	0	development.unspecified
GRMZM2G153393	1	17640824	17656415	25.5601	38.9677	27.0431	27.6461	31.9008	protein.postranslational modification.kinase.receptor like cytoplasmatic kinase VII
GRMZM2G457118	1	17650372	17651838	0.36493	0.325232	0.169978	0.0645817	0.166006	not assigned.unknown
GRMZM2G410515	1	17660940	17667054	6.6544	5.03534	4.99997	5.19889	5.63918	secondary metabolism.isoprenoids.carotenoids.phytoene dehydrogenase
GRMZM5G815358	1	17668482	17670551	0.419183	0.409209	0.403207	0.453255	0.649658	not assigned.unknown
GRMZM2G410623	1	17672747	17680408	0.497849	0.733388	1.10153	1.06743	1.26992	not assigned.unknown
GRMZM2G109431	1	17694592	17698633	0.0483743	0	0.0283123	0.225425	0.410852	cell wall.hemicellulose synthesis.glucuronoxylan
GRMZM2G109480	1	17699634	17701620	120.832	17.4738	49.3897	66.9068	62.819	RNA.regulation of transcription.B3 transcription factor family
GRMZM2G109586	1	17702709	17709912	0	0	0	0	0	DNA.unspecified
GRMZM2G109589	1	17713847	17716644	6.06062	9.87037	10.1784	10.5176	12.0628	secondary metabolism.flavonoids.dihydroflavonols
GRMZM2G410700	1	17717469	17718999	0	0	0	0	0	misc.cytochrome P450
GRMZM2G410704	1	17721994	17725220	0	0	0	0	0	major CHO metabolism.degradation.sucrose.Susy
GRMZM2G113351	1	17734992	17742969	3.56304	2.46554	2.29729	3.1259	3.62076	not assigned.unknown
GRMZM2G113401	1	17745584	17746821	7.89822	7.82831	8.8939	7.21033	7.23581	not assigned.unknown
AC211261.3_FG017	1	17750485	17753239	0	0	0	0	0	not assigned.unknown
GRMZM2G061806	1	17782918	17784536	0	1.03169	3.46375	3.53066	2.28754	secondary metabolism.phenylpropanoids
GRMZM2G056469	1	17829268	17830963	0	17.6902	5.16613	1.62016	0.108891	secondary metabolism.N misc.alkaloid-like
GRMZM2G114918	1	17843397	17845121	0	14.2662	7.07634	3.50049	0.730695	secondary metabolism.phenylpropanoids
GRMZM2G093125	1	17855664	17857563	0.091168	11.5589	2.38801	1.13606	0.0892755	secondary metabolism.N misc.alkaloid-like
GRMZM2G093197	1	17881514	17883260	5.6477	3.91982	5.10201	6.76314	7.37503	tetrapyrrole synthesis.uroporphyrinogen III synthase
AC209626.2_FG013	1	17884403	17885382	5.35323	2.95443	4.62391	7.26346	5.43423	tetrapyrrole synthesis.uroporphyrinogen III synthase
GRMZM2G059020	1	17933388	17954778	0.0193303	0	0	0	0	RNA.processing.RNA helicase
GRMZM2G358311	1	17959175	17964798	5.93007	7.42144	8.51556	8.9597	10.1807	not assigned.unknown
GRMZM2G059102	1	17965513	17987077	0.507707	3.29185	1.99704	2.62805	6.3253	RNA.regulation of transcription.MADS box transcription factor family
GRMZM2G065317	1	17990834	17992174	0	0	0	0	0	not assigned.unknown
GRMZM2G023575	1	18128749	18134691	14.5016	15.8587	15.3423	16.6485	15.1331	not assigned.unknown
GRMZM2G023983	1	18137077	18139832	2.82296	2.60711	2.92285	3.00193	2.72919	DNA.synthesis/chromatin structure
AC177850.2_FG003	1	18142213	18144233	0	0	0	0	0	not assigned.unknown
GRMZM2G024099	1	18188715	18190533	51.0849	14.1495	17.1748	22.6358	10.192	RNA.regulation of transcription.unclassified
GRMZM2G025078	1	18191143	18200031	19.3599	13.1087	16.6135	18.4515	19.3246	metal handling.binding, chelation and storage
AC177850.2_FG005	1	18199711	18200221	9.69812	6.01604	11.0958	11.3754	9.24782	not assigned.unknown
GRMZM5G821686	1	18202396	18202769	3.60398	4.41406	5.46554	4.90437	5.86637	not assigned.unknown
GRMZM2G385605	1	18273992	18294566	5.93804	5.15683	5.63044	6.15179	7.63437	not assigned.unknown
GRMZM2G106017	1	18433096	18437566	10.2232	8.74044	10.5577	14.3927	15.3692	RNA.regulation of transcription.putative transcription regulator
GRMZM2G053627	1	18583638	18585824	8.56711	0.264321	0.628047	0.304324	0.14221	not assigned.unknown
GRMZM2G398848	1	18629571	18632467	2.1524	0.974872	2.02622	1.70032	1.87731	hormone metabolism.auxin.signal transduction
GRMZM2G009326	1	18697096	18699820	39.0212	12.8092	18.398	16.8802	15.1787	hormone metabolism.abscisic acid.induced-regulated-responsive-activated
GRMZM2G117556	1	18832241	18832517	0	0	0	0	0	not assigned.unknown
GRMZM2G117491	1	18834852	18836692	0	0.276035	0.0960355	0.0263407	0.0676524	transport.nucleotides
GRMZM2G005043	1	18890738	18891930	0	0.266016	0.89536	0.209507	0.181814	transport.nucleotides
GRMZM2G031177	1	18974219	18981103	9.71424	134.683	153.865	108.485	81.6552	transport.misc
GRMZM2G148706	1	18984503	18985995	0.212541	0.29278	0.184092	0.373734	0.130362	protein.degradation.ubiquitin.E3.RING
GRMZM2G148726	1	18988900	18991030	1.36751	1.7547	2.96396	2.37046	0.838967	not assigned.unknown
GRMZM2G006626	1	19097735	19099499	0	0	0	0	0	not assigned.unknown
GRMZM2G006631	1	19099990	19102005	0.923266	0.495472	0.154729	0.838604	0.173802	RNA.regulation of transcription.bHLH,Basic Helix-Loop-Helix family
GRMZM2G006676	1	19104048	19104908	27.7426	15.2519	15.1772	15.2188	15.0507	not assigned.unknown
AC177946.2_FG004	1	19104323	19104800	9.67255	6.78533	5.11164	6.95705	8.44722	not assigned.unknown
GRMZM2G132367	1	19250906	19253207	1.46415	18.3372	16.2283	18.6354	17.2382	RNA.regulation of transcription.HB,Homeobox transcription factor family
GRMZM2G075712	1	19261253	19262398	0	1.53794	0.436153	0.652554	0.152552	not assigned.unknown
GRMZM2G095915	1	19294872	19296444	0	0	0	0	0	not assigned.unknown
GRMZM2G154007	1	19327054	19329850	0.177779	33.5462	55.9324	58.3107	51.9631	misc.alcohol dehydrogenases
GRMZM2G397055	1	19346058	19356228	0.0369196	0.272014	0.188984	0.334569	0.807638	fermentation.ADH
GRMZM2G420357	1	19475468	19476633	3.74566	6.32027	4.30851	4.00458	4.16573	not assigned.unknown
GRMZM2G039129	1	19489548	19492878	0	0	0	0	0	misc.UDP glucosyl and glucoronyl transferases
GRMZM2G398603	1	19519635	19523113	0.472338	0.172084	0.154104	0.202539	0	not assigned.unknown
GRMZM2G097283	1	19557388	19560305	0.754524	0.948158	0.541516	0.954223	0.334615	secondary metabolism.isoprenoids
GRMZM2G122488	1	19609596	19611354	0	0	0	0	0	misc.glutathione S transferases
GRMZM2G469002	1	19616049	19617893	0	0	0	0	0	not assigned.unknown
GRMZM2G164527	1	19634808	19637285	12.7634	12.7555	14.4679	13.3588	11.2602	signalling.G-proteins
GRMZM2G464393	1	19639638	19643199	2.92987	2.60571	0.742989	0.560544	0.391847	protein.postranslational modification
GRMZM2G113821	1	19692990	19697407	7.8401	10.2872	10.0905	11.3698	11.2176	protein.degradation.ubiquitin.ubiquitin protease
GRMZM2G113775	1	19698948	19703374	7.02034	7.86015	7.41384	8.36482	8.51674	not assigned.unknown
GRMZM2G055018	1	19773274	19777255	0	0	0	0	0	RNA.processing
GRMZM2G447551	1	19789490	19814550	5.02145	6.83166	2.99427	4.54454	4.33991	RNA.regulation of transcription.AtSR Transcription Factor family
GRMZM2G147481	1	19817411	19820448	2.69654	2.68622	2.03785	2.4001	2.32184	transport.metabolite transporters at the mitochondrial membrane
GRMZM2G015801	1	19900715	19900907	0	0	0	0	0	not assigned.unknown
GRMZM2G015571	1	19901210	19911946	5.35783	4.75402	4.5034	4.19466	4.18722	transport.metabolite transporters at the mitochondrial membrane
GRMZM2G006781	1	19944115	19949161	8.05848	10.1804	9.63618	10.1087	8.50421	minor CHO metabolism.others
GRMZM5G848285	1	19961729	19962008	0	0	0	0	0	not assigned.unknown
AC166636.1_FG007	1	19972337	19973182	3.86412	1.13897	0.786442	1.40695	1.4827	not assigned.unknown
AC166636.1_FG008	1	19980657	19983477	0.164558	1.00488	0.417194	0.409768	0.480734	signalling.G-proteins
AC166636.1_FG009	1	19984787	19991144	1.32767	0.818224	0.508636	0.549335	0.716849	not assigned.unknown
GRMZM2G445296	1	20036373	20037201	0	0	0	0.261247	0	not assigned.unknown
GRMZM5G874665	1	20038691	20044821	0	0	0	0	0	signalling.calcium
GRMZM2G003466	1	20094962	20096296	0.132762	0	0.0384842	0.0498451	0	RNA.regulation of transcription.AP2/EREBP, APETALA2/Ethylene-responsive element binding protein family
GRMZM2G003520	1	20106406	20107201	0	0	0.0370494	0.0160471	0	DNA.synthesis/chromatin structure
GRMZM2G028136	1	20107301	20110627	6.03435	4.40398	6.19035	7.42711	9.67017	DNA.synthesis/chromatin structure
GRMZM2G028247	1	20113474	20116107	0	0	0.0473883	0	0	protein.degradation.serine protease
GRMZM2G432566	1	20213130	20219312	12.6078	11.7291	10.863	13.0018	14.2207	protein.degradation.ubiquitin.E3.RING
GRMZM2G002002	1	20282071	20292395	6.78204	7.37118	6.74166	7.01837	8.83688	not assigned.unknown
GRMZM2G134367	1	20418929	20420739	8.16494	40.2435	24.832	22.9366	23.0686	not assigned.unknown
GRMZM2G155086	1	20527225	20530032	6.14995	2.2368	5.29846	6.93893	6.30994	not assigned.unknown
GRMZM2G145544	1	20600660	20600816	0	0	0	0	0	not assigned.unknown
GRMZM5G808775	1	20634881	20639906	51.7839	45.5005	52.3609	46.9434	44.7839	not assigned.unknown
GRMZM2G013855	1	20694940	20698635	0	0.0419873	0.0268788	0	0	not assigned.unknown
GRMZM2G120631	1	20699429	20700232	0	0	0	0	0	not assigned.unknown
GRMZM2G360495	1	20725549	20726408	0	0	0	0.0735645	0	not assigned.unknown
GRMZM2G029000	1	20900686	20901539	0.287821	0	0.0493634	0.097626	0.33268	not assigned.unknown
GRMZM2G029055	1	20902294	20915630	7.68798	5.89579	5.00687	4.90651	4.89587	protein.aa activation.methionine-tRNA ligase
GRMZM2G111191	1	20990138	20995107	26.6358	7.11984	18.1602	31.6466	30.0227	RNA.regulation of transcription.unclassified
GRMZM2G111214	1	20996717	20999948	8.53854	13.4684	12.9538	14.4974	15.2501	cell.vesicle transport
GRMZM2G411079	1	21068147	21073758	0	0	0	0	0	protein.degradation.cysteine protease
GRMZM2G411084	1	21082680	21083661	7.70264	3.60412	5.25655	4.70971	2.81618	cell.organisation
GRMZM2G064841	1	21196692	21221560	10.1322	11.952	11.0279	11.0395	8.43974	cell wall.precursor synthesis
GRMZM2G464510	1	21248685	21250409	1.09714	1.82836	2.33471	2.00992	2.26945	not assigned.unknown
GRMZM2G464515	1	21250624	21251334	1.4286	0.796231	0.961812	1.34221	1.77993	not assigned.unknown
GRMZM2G581425	1	21253321	21253905	0	0	0	0	0	not assigned.unknown
GRMZM5G896834	1	21377568	21383466	14.2846	12.4606	12.0929	12.1352	13.0907	development.unspecified
GRMZM5G833323	1	21387523	21389602	0	0	0	0	0	not assigned.unknown
GRMZM2G004259	1	21456898	21461749	35.0307	29.0159	29.4456	26.938	25.5139	RNA.regulation of transcription.unclassified
GRMZM2G004397	1	21465382	21468805	4.3022	7.7607	6.51727	6.89607	7.38191	not assigned.unknown
GRMZM2G004422	1	21469309	21471441	3.77615	4.84235	3.71044	4.69382	5.29752	protein.degradation.ubiquitin.E3.RING
GRMZM2G004523	1	21471913	21474815	0	1.54138	4.78983	5.21039	7.65047	signalling.light
GRMZM2G307084	1	21482553	21492369	0	0	0	0	0	not assigned.unknown
GRMZM2G086604	1	21525228	21543573	6.70718	3.42101	5.02562	7.00418	7.3736	not assigned.unknown
GRMZM2G162535	1	21567963	21568863	1.16087	0	0.0763085	0	0	not assigned.unknown
AC200038.4_FG011	1	21603260	21604413	0	0	0	0	0	hormone metabolism.ethylene.signal transduction
GRMZM2G703514	1	21605167	21611868	0	0	0	0	0	hormone metabolism.ethylene.signal transduction
GRMZM2G461907	1	21635876	21636663	0	0	0	0	0	hormone metabolism.ethylene.signal transduction
GRMZM2G461905	1	21637345	21641317	0	0	0	0	0	hormone metabolism.ethylene.signal transduction
GRMZM2G415251	1	21678944	21680766	0	0	0	0	0	hormone metabolism.ethylene.signal transduction
GRMZM2G114234	1	21683012	21685949	3.69867	1.91123	1.63087	1.13501	0.941279	not assigned.unknown
GRMZM2G114232	1	21686808	21688756	0.901522	1.20788	2.39769	1.75473	1.16032	not assigned.unknown
GRMZM2G114190	1	21702391	21710565	11.0931	8.63569	7.9499	7.60201	9.29279	not assigned.unknown
GRMZM2G114184	1	21720855	21722289	0.532842	0.224963	0.697158	0.521028	0.77503	misc.GCN5-related N-acetyltransferase
GRMZM2G114055	1	21757361	21776523	26.1589	24.7537	49.9864	85.1941	111.363	signalling.light
GRMZM2G110847	1	21781393	21788911	0	0	0	0	0	redox.ascorbate and glutathione
GRMZM2G411216	1	21902400	21907209	0	0	0	0	0	not assigned.unknown
GRMZM2G388915	1	21983736	21994162	2.87286	2.01084	2.11716	1.99736	2.43492	DNA.repair
GRMZM2G346750	1	22068826	22070196	0	0	0.0373764	0.0485433	0	RNA.regulation of transcription.bHLH,Basic Helix-Loop-Helix family
GRMZM5G895573	1	22152250	22155368	0.691329	0.144063	0.386805	0.172468	0.866224	not assigned.unknown
GRMZM5G880508	1	22246903	22253428	13.0061	13.237	11.8557	12.104	13.4448	not assigned.unknown
GRMZM5G872264	1	22255043	22260130	0.151918	0.391622	0.190765	0.318165	0.156958	not assigned.unknown
GRMZM2G107395	1	22283209	22284981	0	0	0	0.197263	0	signalling.14-3-3 proteins
GRMZM2G107440	1	22285187	22285864	0	0	0	0	0	not assigned.unknown
GRMZM2G007130	1	22373475	22376079	0.468297	0.489922	0.263541	0.240876	0.251681	cell.cycle
GRMZM2G006977	1	22379292	22385166	2.03713	14.8271	5.90612	5.82239	6.87639	signalling.calcium
GRMZM2G077127	1	22437816	22440310	2.06086	7.46094	3.24017	4.07336	4.14422	not assigned.unknown
GRMZM2G457178	1	22498643	22510140	4.38616	6.82895	7.04469	6.91885	9.07068	not assigned.unknown
GRMZM2G457201	1	22509372	22512968	10.9553	9.42741	10.5172	11.7625	14.3255	cell.cycle
GRMZM2G119104	1	22584638	22596607	10.5795	6.30308	6.982	7.56256	7.67243	not assigned.unknown
AC177837.3_FG002	1	22598347	22599226	0	0	0	0	0	not assigned.unknown
GRMZM2G055025	1	22629309	22633408	37.4992	29.5729	30.8473	27.2831	23.4128	transport.sugars
GRMZM2G055101	1	22639251	22643698	0	0.232861	0.0228288	0.0864863	0	cell wall.degradation.mannan-xylose-arabinose-fucose
GRMZM2G055172	1	22644341	22647723	11.2289	13.0076	11.5403	14.1731	15.0201	not assigned.unknown
GRMZM2G055217	1	22647427	22651244	3.05463	12.062	8.11077	8.9676	12.1663	not assigned.unknown
GRMZM2G055282	1	22655574	22658303	1.21884	1.3681	1.5852	1.5701	2.01623	not assigned.unknown
GRMZM2G007486	1	22736087	22739715	12.2005	11.4619	10.8931	12.9148	16.7639	cell.cycle.peptidylprolyl isomerase
GRMZM2G307529	1	22740003	22742501	0	0.117547	0	0.0192317	0	not assigned.unknown
GRMZM2G007347	1	22743862	22748613	2.88739	6.16817	3.44651	2.80132	1.86411	not assigned.unknown
GRMZM2G007188	1	22773201	22776455	14.1675	11.7395	12.7158	14.0257	15.014	protein.targeting.secretory pathway.unspecified
GRMZM2G015067	1	22866775	22874253	13.4846	8.12357	9.28745	8.72108	7.21434	mitochondrial electron transport / ATP synthesis.cytochrome c oxidase
GRMZM2G015219	1	22888693	22893398	1.47887	2.68833	2.47818	3.5838	4.86712	signalling.calcium
GRMZM2G312226	1	22893594	22894905	0	0.050955	0.0488297	0.0204232	0	not assigned.unknown
GRMZM5G863656	1	22937895	22938573	476.983	509.147	571.727	538.993	615.209	protein.synthesis.ribosomal protein.eukaryotic.40S subunit.S3A
GRMZM2G013457	1	22938595	22940499	306.764	321.423	343.593	377.586	445.192	protein.synthesis.ribosomal protein.eukaryotic.40S subunit.S3A
GRMZM2G140674	1	22977372	22978822	1.11163	5.14418	1.25945	2.14517	1.17693	not assigned.unknown
GRMZM2G440363	1	22980028	22986648	0	0	0	0	0	RNA.regulation of transcription.bHLH,Basic Helix-Loop-Helix family
GRMZM2G380789	1	23046862	23048308	0.181505	3.30231	1.61645	1.10542	2.53981	not assigned.unknown
GRMZM2G127635	1	23110429	23112083	1.29858	0.161628	0.534218	0.879291	1.54901	not assigned.unknown
GRMZM2G035217	1	23191761	23193810	4.58875	1.7974	2.94926	4.26613	5.12887	not assigned.unknown
GRMZM2G005844	1	23216682	23224896	2.45418	3.17908	3.41685	3.79727	5.14536	RNA.regulation of transcription.putative transcription regulator
GRMZM2G005624	1	23241090	23244476	2.73353	12.4419	6.9817	7.86543	9.98071	RNA.regulation of transcription.HB,Homeobox transcription factor family
GRMZM2G005435	1	23242721	23250032	15.7728	7.73631	7.75749	12.525	16.3915	hormone metabolism.ethylene.signal transduction
GRMZM2G304818	1	23251952	23253665	0	0	0	0	0	not assigned.unknown
GRMZM2G304809	1	23299817	23300324	0.160151	0	0.126419	0	0	not assigned.unknown
AC186653.4_FG005	1	23342659	23343165	0	0	0	0	0	not assigned.unknown
GRMZM2G121706	1	23423943	23425221	1.52612	0.649906	0.151494	0.563215	0.957798	not assigned.unknown
GRMZM2G002498	1	23490723	23493959	0	0	0	0	0	protein.synthesis.ribosomal protein.eukaryotic.40S subunit.S23
GRMZM2G471253	1	23554709	23556192	0	0.114915	0.242646	0.281768	0	not assigned.unknown
GRMZM2G171073	1	23563516	23567058	5.65245	9.38666	6.67643	6.30303	7.37839	RNA.regulation of transcription.C2H2 zinc finger family
AC205725.3_FG010	1	23582643	23586128	13.0858	19.6149	14.9621	15.2196	17.4341	not assigned.unknown
GRMZM2G153769	1	23605043	23615788	28.5935	22.471	20.4173	19.9141	20.9867	signalling.light.COP9 signalosome
GRMZM2G153920	1	23616443	23618347	0	2.72606	1.55946	1.38088	1.06459	transport.sugars
GRMZM2G163557	1	23832548	23833218	0	0	0	0	0	not assigned.unknown
GRMZM2G301885	1	23923032	23925308	4.10725	0	0.333369	0.34663	0.507831	transport.sugars
GRMZM2G002492	1	23937121	23941732	5.06288	3.58058	4.78208	4.14484	3.8216	not assigned.unknown
GRMZM2G047513	1	23962962	23967526	7.62201	5.07059	5.58734	6.44799	6.68634	protein.synthesis.ribosomal protein.prokaryotic.chloroplast.30S subunit.S10
GRMZM2G013430	1	24050822	24052281	13.2522	4.69462	3.42731	2.48792	2.32853	amino acid metabolism.synthesis.serine-glycine-cysteine group.cysteine.SAT
GRMZM2G440543	1	24207340	24208364	3.6869	0.543887	1.28468	2.7999	4.51385	not assigned.unknown
GRMZM2G139852	1	24225116	24229054	76.318	21.1152	25.536	21.0803	16.6749	not assigned.unknown
GRMZM2G103873	1	24308389	24309188	0.779834	0.646888	1.11525	0.0747375	0.387938	not assigned.unknown
GRMZM2G159632	1	24404289	24408869	17.3497	4.02711	5.75767	4.90331	6.39262	transport.sulphate
GRMZM2G042171	1	24582983	24588491	8.36092	11.5884	9.15326	7.15085	5.18465	transport.sulphate
GRMZM2G119150	1	24599396	24603787	0	0.17158	0	0	0	amino acid metabolism.synthesis.aromatic aa.phenylalanine and tyrosine
GRMZM2G003506	1	24674836	24677482	0	10.0464	4.22633	2.80657	3.34683	hormone metabolism.auxin.induced-regulated-responsive-activated
GRMZM2G331652	1	24734480	24737194	2.37198	1.4217	1.8153	2.10463	2.86629	not assigned.unknown
GRMZM2G331638	1	24742644	24744395	0.0591115	0.055225	0.167178	0.53317	0	hormone metabolism.auxin.induced-regulated-responsive-activated
GRMZM2G071374	1	24778396	24781286	0	0	0	0	0	stress.abiotic.cold
GRMZM2G071343	1	24781227	24786321	0	0	0	0	0	polyamine metabolism.degradation.polyamin oxidase
GRMZM5G812298	1	24793937	24794202	1.38	0	1.16264	1.48204	0	not assigned.unknown
GRMZM2G071292	1	24798681	24801411	1.33552	1.88851	1.57723	1.74729	0.888772	stress.abiotic.cold
GRMZM2G071217	1	24801899	24805494	0	0	0	0	0	polyamine metabolism.degradation.polyamin oxidase
GRMZM2G153814	1	24805619	24806963	0	0	0	0	0	stress.abiotic.cold
GRMZM2G153799	1	24807415	24811279	0	0	0	0	0	polyamine metabolism.degradation.polyamin oxidase
GRMZM2G032423	1	24931335	24942030	20.5383	18.1117	18.3133	17.7231	19.5474	cell wall.cell wall proteins.HRGP
GRMZM2G023364	1	25101391	25102254	0.053284	0	0.0265078	0.034304	0	not assigned.unknown
GRMZM2G326869	1	25104485	25108224	0	0	0	0	0	not assigned.unknown
GRMZM2G376074	1	25150274	25171105	32.0964	23.6525	25.6546	31.5909	37.0482	protein.degradation.ubiquitin.ubiquitin protease
GRMZM2G077045	1	25171942	25180175	0	0	0	0	0	development.unspecified
GRMZM2G451028	1	25262375	25263272	0	0	0	0	0	not assigned.unknown
GRMZM2G155242	1	25284138	25288349	226.643	27.4796	30.0356	39.0261	37.6788	minor CHO metabolism.myo-inositol.InsP Synthases
GRMZM2G070716	1	25370614	25372781	12.5523	19.1198	19.4854	22.3839	20.323	not assigned.unknown
GRMZM2G070442	1	25376410	25379567	19.1077	10.2311	8.84445	7.38425	7.08108	not assigned.unknown
GRMZM2G069765	1	25381003	25387870	124.387	63.8165	83.4098	82.0565	94.6155	protein.folding
GRMZM2G523621	1	25389594	25390374	0	0	0	0	0	not assigned.unknown
GRMZM2G107774	1	25393811	25396337	0.0584358	0.0556117	0.0375694	0.122185	0.251311	RNA.regulation of transcription.unclassified
GRMZM2G107805	1	25397356	25400229	1.88808	1.74944	2.01863	2.12087	2.26389	not assigned.unknown
GRMZM2G107815	1	25410356	25414879	6.83784	13.1266	12.3597	13.3034	11.3505	not assigned.unknown
GRMZM2G107854	1	25415480	25422492	7.05363	10.2339	8.07911	7.46689	8.62712	misc.UDP glucosyl and glucoronyl transferases
GRMZM2G107872	1	25424996	25429223	20.3699	33.5038	24.7914	27.4872	25.0523	stress.biotic
GRMZM5G890241	1	25440179	25452422	5.31043	9.36049	7.21017	8.00362	6.34978	not assigned.unknown
GRMZM2G160224	1	25616488	25619070	0	0	0	0	0	not assigned.unknown
GRMZM2G091563	1	25625763	25630712	22.8357	26.648	24.8263	27.3513	27.0086	protein.targeting.mitochondria
GRMZM2G091543	1	25631766	25634781	20.9571	3.6961	7.43844	11.867	12.2597	not assigned.unknown
GRMZM2G391403	1	25635555	25635912	0	0	0	0	0	not assigned.unknown
GRMZM2G091511	1	25637751	25640835	18.3687	8.28083	14.4971	17.8689	18.2236	cell.vesicle transport
GRMZM5G870116	1	25691847	25692236	0	0	0	0	0	not assigned.unknown
GRMZM2G015804	1	25704470	25711793	6.23386	1.49396	0.768159	0.524757	0.613432	misc.gluco-, galacto- and mannosidases
GRMZM2G130987	1	25741893	25746678	127.269	298.68	200.099	208.48	188.723	protein.targeting.secretory pathway.unspecified
GRMZM2G103059	1	25810183	25814934	0	0	0.471521	0	1.21879	protein.synthesis.ribosomal protein.eukaryotic.60S subunit.L44
GRMZM2G103079	1	25820683	25828147	7.98906	8.41405	7.47959	9.79085	9.7358	not assigned.unknown
GRMZM2G395121	1	25876002	25883331	2.52318	2.51612	2.85813	4.01332	4.45207	RNA.regulation of transcription.unclassified
GRMZM2G094444	1	25884386	25889238	9.45788	9.31104	10.8523	11.6339	12.7707	transport.metabolite transporters at the mitochondrial membrane
GRMZM2G069458	1	26037374	26039660	74.0857	42.53	46.8658	53.3876	52.9326	mitochondrial electron transport / ATP synthesis.F1-ATPase
GRMZM2G038165	1	26119729	26127936	0	0	0	0	0	signalling.receptor kinases.leucine rich repeat VIII-1
GRMZM2G038252	1	26128330	26132305	0	0	0	0	0	RNA.regulation of transcription.HB,Homeobox transcription factor family
GRMZM2G009638	1	26149585	26151146	111.348	79.3177	90.6817	88.7669	79.6962	mitochondrial electron transport / ATP synthesis.F1-ATPase
GRMZM2G079823	1	26197450	26203843	20.6429	18.0864	19.4965	20.6529	22.6936	not assigned.unknown
GRMZM2G098714	1	26326639	26330061	5.38509	2.9292	6.88343	6.505	6.2955	DNA.synthesis/chromatin structure
GRMZM2G098667	1	26333983	26338524	6.6473	6.34649	8.17676	8.84815	9.28809	lipid metabolism.glycolipid synthesis.DGDG synthase
GRMZM2G472693	1	26427722	26432914	10.5109	10.5422	10.613	12.4224	14.4877	not assigned.unknown
GRMZM2G173067	1	26434315	26438845	4.15861	10.1579	7.77298	7.24476	7.35769	protein.glycosylation
GRMZM2G088309	1	26575977	26581139	1.74662	2.05584	0.736581	0.388332	0.554511	RNA.regulation of transcription.C2C2(Zn) YABBY family
GRMZM2G100519	1	26601398	26618846	0	0	0	0	0	not assigned.unknown
GRMZM2G099522	1	26670936	26680638	3.9846	2.00924	1.94126	2.2159	1.97484	RNA.regulation of transcription.MADS box transcription factor family
GRMZM2G099628	1	26684240	26696594	36.8706	36.4935	43.5192	45.9729	52.0799	protein.aa activation.methionine-tRNA ligase
GRMZM2G099767	1	26700379	26705232	0	0	0	0	0	cell.organisation
GRMZM2G365544	1	26765245	26770266	0	0	0	0	0	cell wall.hemicellulose synthesis.glucuronoxylan
GRMZM2G165622	1	26818271	26821649	5.1379	5.19238	5.43898	6.65393	7.96464	amino acid metabolism.synthesis.serine-glycine-cysteine group.cysteine.OASTL
GRMZM2G128744	1	26821749	26824099	13.862	12.4903	13.5949	14.1075	15.5762	amino acid metabolism.synthesis.serine-glycine-cysteine group.cysteine.OASTL
GRMZM2G128665	1	26825188	26827533	1.52792	1.23162	1.65739	1.29406	1.47534	DNA.synthesis/chromatin structure
GRMZM2G178894	1	26911780	26913484	0.121863	0	0	0	0.1183	RNA.regulation of transcription.C2H2 zinc finger family
GRMZM2G163043	1	27070661	27072367	1.98813	1.86832	2.62596	2.43228	2.88757	not assigned.unknown
GRMZM2G163116	1	27082521	27084043	0.0691335	0	0.0407833	0.229016	0.536903	not assigned.unknown
GRMZM2G163129	1	27094497	27098727	19.1249	24.4442	23.0358	21.769	19.8531	major CHO metabolism.degradation.starch.starch cleavage
GRMZM2G163154	1	27099021	27102890	0.379119	0.336626	0.415273	0.388448	0.0596373	transport.misc
AC208897.3_FG003	1	27116185	27121004	0.578348	0.33989	0.557413	0.631118	0.912533	cell.organisation
AC208897.3_FG004	1	27122108	27127600	0.475251	54.274	48.0442	40.8811	25.2239	transport.sugars
GRMZM5G879116	1	27171719	27174928	29.1609	37.2097	37.0823	57.2695	69.1089	transport.misc
GRMZM5G891739	1	27178032	27184068	10.6017	9.55904	11.3947	12.2198	13.5701	redox.dismutases and catalases
GRMZM5G842306	1	27185100	27189201	0	0	0	0.0527245	0.131049	transport.misc
GRMZM2G134251	1	27303823	27306170	7.64464	15.7745	13.28	12.9581	9.38054	not assigned.unknown
GRMZM2G157580	1	27379185	27384566	14.9889	9.80407	11.7139	14.4819	16.5268	not assigned.unknown
GRMZM2G407287	1	27388377	27398728	20.5425	19.772	23.8058	20.6155	20.5463	RNA.regulation of transcription.CCAAT box binding factor family, DR1
AC197545.3_FG002	1	27401503	27406941	14.1347	11.65	11.8404	12.428	14.9455	RNA.regulation of transcription.CCAAT box binding factor family, DR1
GRMZM2G164965	1	27501319	27503257	12.1129	8.1962	12.5469	13.7169	12.2487	protein.synthesis.ribosomal protein.prokaryotic.chloroplast.50S subunit.L15
GRMZM2G164974	1	27506253	27508489	0.392861	8.16597	4.10808	2.58887	1.48353	lipid metabolism.FA synthesis and FA elongation.beta ketoacyl CoA synthase
GRMZM2G111324	1	27626301	27631083	37.4534	23.9782	37.4811	50.8357	52.333	misc.beta 1,3 glucan hydrolases.glucan endo-1,3-beta-glucosidase
GRMZM2G411668	1	27637193	27639996	0.0535271	0.151428	0.06675	0.0729877	0.0490511	signalling.receptor kinases.S-locus glycoprotein like
GRMZM2G411653	1	27639161	27648749	10.4863	2.68824	3.1554	3.00065	3.03277	not assigned.unknown
GRMZM2G039968	1	27771122	27774022	0	0	0.0869865	0	0	not assigned.unknown
GRMZM2G040052	1	27775717	27778296	0.851364	0.454118	0.988895	0.564918	0.525174	not assigned.unknown
GRMZM2G040121	1	27799308	27804433	0.275149	1.84728	4.48508	3.81933	7.27763	development.unspecified
GRMZM2G342685	1	27861272	27868552	0.642525	0.0497769	0.0545168	0.0279916	0.153322	development.unspecified
GRMZM2G040561	1	27894899	27915908	6.10328	5.18956	5.73191	5.8777	5.83245	stress.abiotic.heat
GRMZM2G040728	1	27916676	27918465	0.0483147	0.844413	0.198398	0.1425	0	misc.cytochrome P450
GRMZM2G050514	1	27977782	27981439	0.315677	225.012	214.481	170.463	135.545	N-metabolism.ammonia metabolism.glutamine synthase
GRMZM2G128613	1	28069503	28078372	11.0876	9.00811	8.93023	10.0973	10.1059	not assigned.unknown
GRMZM2G100242	1	28201158	28213384	40.1739	38.8436	43.4022	44.9493	46.5941	protein.targeting.nucleus
GRMZM2G024435	1	28290759	28293553	0.529105	1.12034	1.3396	1.21349	1.11908	not assigned.unknown
GRMZM2G140991	1	28376317	28378676	2.22321	1.66	2.12863	2.56919	2.62768	not assigned.unknown
GRMZM2G140549	1	28381773	28386048	0.927575	0.962002	1.08236	0.565295	1.20641	not assigned.unknown
GRMZM2G099797	1	28417262	28422210	8.84719	9.56384	9.25061	10.5427	12.5944	RNA.regulation of transcription.ARR
GRMZM2G397754	1	28423197	28424903	0	0	0	0.0268376	0	transport.misc
GRMZM2G703531	1	28445752	28446048	0	0	0	0	0	not assigned.unknown
GRMZM2G099860	1	28446185	28450646	37.2531	47.1843	38.139	41.8282	36.3914	minor CHO metabolism.trehalose.potential TPS/TPP
GRMZM2G118485	1	28522254	28529670	4.4413	3.50436	3.14588	3.44857	3.42119	stress.abiotic.heat
GRMZM2G118529	1	28533298	28534629	0	0	0	0	0	not assigned.unknown
GRMZM2G417905	1	28542679	28544129	0	0	0	0	0	protein.degradation.cysteine protease
GRMZM2G025123	1	28596564	28606486	4.36406	4.48011	4.93605	6.66659	9.30278	protein.targeting.chloroplast
GRMZM2G344388	1	28609367	28610826	1.68519	0	0.151133	0.096091	0	signalling.MAP kinases
GRMZM2G344416	1	28632288	28639453	0.22207	0.264406	0.285948	0.305362	0.298056	cell.cycle
GRMZM2G040828	1	28641980	28643490	2.38406	2.20395	2.32069	2.76067	1.82631	not assigned.unknown
GRMZM2G036257	1	28764779	28766432	0	0	0	0	0	misc.cytochrome P450
GRMZM2G103579	1	28793712	28799945	22.6689	16.1468	16.1635	19.9026	23.1331	not assigned.unknown
GRMZM2G433579	1	28861652	28867635	2.08732	2.47967	1.75131	2.2676	1.93439	signalling.receptor kinases.wall associated kinase
GRMZM2G002178	1	28925826	28928044	10.1651	15.3231	14.3322	13.8993	5.98811	hormone metabolism.jasmonate.synthesis-degradation.allene oxidase synthase
GRMZM2G051406	1	28955797	28956425	0	0	0	0	0	not assigned.unknown
GRMZM2G469304	1	28961030	28964979	8.12982	2.55356	4.66378	6.50217	4.94368	not assigned.unknown
GRMZM2G153611	1	28966883	28976750	4.29327	3.66317	3.96533	4.10755	4.16063	protein.degradation.ubiquitin.E3.RING
GRMZM2G180023	1	29030948	29032892	0	0	0	0.0261958	0	protein.postranslational modification.kinase.receptor like cytoplasmatic kinase VII
GRMZM2G180044	1	29035534	29036849	0	0	0	0	0	not assigned.unknown
GRMZM2G480698	1	29037123	29038690	0	0	0	0	0	cell wall.cell wall proteins.LRR
GRMZM2G447504	1	29102975	29105269	0	0	0	0	0	protein.postranslational modification
GRMZM2G161780	1	29151673	29157313	12.0636	12.8744	11.7854	11.6538	11.6445	not assigned.unknown
GRMZM2G476914	1	29196147	29198817	4.39227	3.0656	2.76406	3.13837	2.62785	protein.degradation.ubiquitin.E3.RING
GRMZM2G180478	1	29242886	29248567	0.633933	0.776189	0.730441	0.976394	1.46732	not assigned.unknown
GRMZM2G180458	1	29254236	29256101	14.4797	16.6404	12.9685	14.9574	13.4846	RNA.regulation of transcription.bHLH,Basic Helix-Loop-Helix family
GRMZM2G180452	1	29259498	29263235	3.22269	5.55651	3.63582	2.67441	1.91464	RNA.regulation of transcription.bHLH,Basic Helix-Loop-Helix family
GRMZM2G012126	1	29354791	29360968	4.04793	2.86027	3.56299	4.13821	3.28359	not assigned.unknown
GRMZM2G091456	1	29399684	29404550	22.0609	15.0032	14.5672	13.2947	10.3233	hormone metabolism.brassinosteroid.synthesis-degradation.sterols.other
GRMZM5G826760	1	29465062	29465363	0	0	0	0	0	not assigned.unknown
AC190934.3_FG003	1	29493131	29493674	0	0	0	0	0	not assigned.unknown
GRMZM2G153536	1	29512427	29515645	1.25735	189.541	53.102	37.6586	21.9225	amino acid metabolism.synthesis.branched chain group.common.branched-chain amino acid aminotransferase
GRMZM2G126808	1	29541232	29543641	0.321583	0.38541	0.496798	0.73536	1.09532	RNA.regulation of transcription.HB,Homeobox transcription factor family
GRMZM2G122543	1	29682996	29686636	5.34049	4.19885	1.21746	0.779164	0.657218	not assigned.unknown
AC186009.3_FG001	1	29697500	29698458	0	0	0	0	0	not assigned.unknown
GRMZM2G088843	1	29741297	29743471	5.10693	3.99802	3.46725	3.95263	3.34022	not assigned.unknown
GRMZM2G135877	1	29787211	29789337	0.103975	3.26043	1.66242	2.34904	1.74118	transport.misc
GRMZM2G317317	1	29966150	29970745	0	0	0.108222	0.104935	0.0902583	RNA.regulation of transcription.bHLH,Basic Helix-Loop-Helix family
GRMZM2G548849	1	30030507	30031154	0	0	0	0	0	not assigned.unknown
GRMZM2G110131	1	30034642	30036647	0	0	0	0	0	not assigned.unknown
GRMZM5G896413	1	30042424	30043077	0	0	0	0	0	RNA.regulation of transcription.bHLH,Basic Helix-Loop-Helix family
GRMZM2G034737	1	30055943	30056530	0	0	0	0	0	RNA.regulation of transcription.bHLH,Basic Helix-Loop-Helix family
GRMZM2G043584	1	30256018	30259972	3.53008	17.4903	26.2622	43.191	44.6581	signalling.receptor kinases.leucine rich repeat XI
GRMZM2G043569	1	30278422	30279326	0	0.241948	0.0435423	0.057438	0.146731	not assigned.unknown
GRMZM2G043542	1	30287162	30291034	0	0	0	0.0215508	0	protein.degradation.ubiquitin.ubiquitin protease
GRMZM2G344996	1	30292737	30293177	0	0	0	0	0	not assigned.unknown
GRMZM2G043470	1	30297522	30302047	0.831157	0.496337	0.945832	1.43038	0.961401	protein.postranslational modification.kinase.receptor like cytoplasmatic kinase V
GRMZM2G364145	1	30345656	30348160	6.69974	10.9718	8.64263	9.83193	13.6184	not assigned.unknown
GRMZM2G364178	1	30346097	30348160	26.1809	32.0245	35.4483	37.9074	45.9584	not assigned.unknown
GRMZM2G163711	1	30385559	30385913	0	0	0	0	0	RNA.regulation of transcription.putative transcription regulator
GRMZM2G031560	1	30398682	30402444	0	0	0	0	0	not assigned.unknown
GRMZM2G065635	1	30533899	30540267	0.704808	4.26335	1.62957	1.57043	1.66276	hormone metabolism.brassinosteroid.synthesis-degradation.BRs.DWF4
GRMZM2G554644	1	30621906	30622282	4.4255	2.50529	2.28689	3.6438	4.06666	not assigned.unknown
GRMZM2G133573	1	30687217	30687882	5.88722	5.71263	5.06124	4.08434	4.40501	not assigned.unknown
GRMZM2G311165	1	30744805	30751792	0.223492	7.89875	4.37651	2.35754	2.28747	amino acid metabolism.synthesis.branched chain group.common
GRMZM2G012758	1	30750798	30753653	0.519231	6.38123	3.24443	2.64015	2.46706	misc.beta 1,3 glucan hydrolases
GRMZM2G012501	1	30753586	30762772	30.4066	24.0316	24.6122	30.0172	30.4559	cell.vesicle transport
GRMZM5G844419	1	30784997	30792218	0	0	0	0	0	DNA.unspecified
GRMZM2G525605	1	30801490	30801977	0	0	0	0	0	not assigned.unknown
GRMZM2G072292	1	30802535	30805331	0	0	0.0180836	0	0	signalling.receptor kinases.proline extensin like
GRMZM2G072041	1	30887008	30890663	4.03159	2.9731	4.30266	3.80361	4.12206	not assigned.unknown
GRMZM2G072088	1	30904863	30915086	6.48939	5.89079	4.9838	5.54021	5.16049	not assigned.unknown
GRMZM5G889013	1	31011708	31012128	0	0	0	0	0	not assigned.unknown
GRMZM2G149038	1	31032583	31034191	0	0	0	0	0	not assigned.unknown
AC196789.3_FG001	1	31048532	31050042	0	0	0	0	0	not assigned.unknown
GRMZM2G118497	1	31055319	31060153	11.2375	10.9369	8.82189	9.01192	8.55554	transport.metal
GRMZM2G118495	1	31064876	31065943	0	0	0	0	0	protein.postranslational modification.kinase.receptor like cytoplasmatic kinase VIII
GRMZM2G116292	1	31068643	31206122	445.124	314.448	449.906	398.48	375.842	protein.degradation.ubiquitin.ubiquitin
GRMZM2G116823	1	31206889	31208507	0	0	0	0	0	misc.peroxidases
GRMZM2G116846	1	31242216	31244585	0	0.082629	0.0362625	0.0691787	0	misc.peroxidases
GRMZM2G116902	1	31249225	31251080	0	0	0	0	0.104709	misc.peroxidases
GRMZM2G101841	1	31343728	31345291	0	0	0	0	0	minor CHO metabolism.trehalose.potential TPS/TPP
GRMZM2G096877	1	31374396	31378813	21.8787	17.1958	16.1792	17.0889	17.6779	not assigned.unknown
GRMZM2G079889	1	31426971	31432084	2.06221	5.45148	4.29535	5.06622	4.61614	transport.peptides and oligopeptides
GRMZM2G167138	1	31485075	31497325	1.46204	3.29817	2.13489	3.02826	2.56129	transport.peptides and oligopeptides
GRMZM2G167151	1	31501063	31501897	0	0	0	0	0	not assigned.unknown
GRMZM2G467695	1	31535317	31536195	0	0	0	0.24154	0.20632	cell.division
GRMZM2G147603	1	31578023	31598791	17.7064	8.92989	14.1879	14.9917	17.5701	cell.division
GRMZM2G061096	1	31738932	31743850	33.7583	57.0324	50.2662	52.3963	46.8081	not assigned.unknown
GRMZM2G060952	1	31744678	31747784	49.0523	38.6342	47.7904	59.5007	59.5032	minor CHO metabolism.others
GRMZM2G465595	1	31764157	31768066	0.971506	0.0795665	0.592749	0.774614	0.808498	RNA.regulation of transcription.C2H2 zinc finger family
GRMZM2G100714	1	31857242	31862762	3.83413	0.53785	0.885113	0.872903	1.1136	cell.organisation
GRMZM2G100629	1	31865255	31870595	9.73783	1.41454	2.09781	2.43598	2.80744	not assigned.unknown
GRMZM2G031102	1	31896750	31897513	0	0	0	0	0	misc.protease inhibitor/seed storage/lipid transfer protein (LTP) family protein
GRMZM2G152360	1	31972387	31976896	1.41925	1.13972	1.32932	1.01632	1.19412	cell.cycle
GRMZM2G152390	1	31997373	32001173	0	0	0	0	0	DNA.synthesis/chromatin structure
GRMZM2G453342	1	32001775	32002812	0	0	0	0	0	transport.cyclic nucleotide or calcium regulated channels
GRMZM2G152447	1	32021587	32024355	2.87739	0.0282805	0.255406	0.207937	0.236947	misc.acid and other phosphatases
GRMZM2G152477	1	32051837	32054795	0.283927	0.523958	1.45954	2.40345	2.67083	misc.acid and other phosphatases
GRMZM2G152549	1	32081719	32087464	28.3494	31.3534	28.5898	29.9393	31.1058	not assigned.unknown
GRMZM2G152663	1	32090673	32094044	15.6861	12.1965	12.8104	13.5976	16.1052	not assigned.unknown
GRMZM2G157197	1	32153436	32157170	0.785695	1.61176	1.25784	1.43743	1.38827	RNA.regulation of transcription.C2H2 zinc finger family
GRMZM2G157177	1	32158871	32167717	5.7776	5.17337	5.00136	5.33336	5.43004	RNA.regulation of transcription.bZIP transcription factor family
GRMZM2G157157	1	32197281	32203359	34.9828	27.9378	33.5008	34.0746	33.4662	protein.targeting.chloroplast
GRMZM2G055052	1	32227143	32228885	0.37177	0.928119	0.545779	0.267003	0.0877942	RNA.regulation of transcription.PHOR1
GRMZM2G099528	1	32308315	32321893	74.426	60.4551	56.1969	65.8978	72.8022	not assigned.unknown
GRMZM5G884325	1	32321850	32328441	107.751	66.9626	90.1137	100.575	105.401	RNA.processing
GRMZM2G085427	1	32369308	32377111	10.8864	9.24836	7.72283	10.3205	13.1504	RNA.regulation of transcription.MYB domain transcription factor family
GRMZM2G104255	1	32401930	32403356	16.1719	14.0517	14.4314	15.7487	15.8902	RNA.regulation of transcription.MYB domain transcription factor family
GRMZM5G868062	1	32525169	32532554	134.275	63.6878	100.762	97.407	106.031	protein.synthesis.ribosomal protein.eukaryotic.60S subunit.L7A
GRMZM5G849530	1	32539831	32543610	6.82526	8.48931	8.99282	8.43144	9.21101	not assigned.unknown
GRMZM5G818431	1	32577837	32582178	0.0917157	0.36558	0.121665	0.548972	0.369529	protein.postranslational modification.kinase.receptor like cytoplasmatic kinase VI
AC231441.1_FG004	1	32664885	32665985	0.12781	0	0	0	0	not assigned.unknown
AC155390.2_FG002	1	32667227	32669225	1.46217	1.75419	1.59342	1.93706	2.05495	not assigned.unknown
GRMZM2G360234	1	32756096	32757729	0	0.0416559	0	0	0.0868123	not assigned.unknown
GRMZM2G059260	1	32806578	32808873	0	0	0	0	0	protein.targeting.secretory pathway.unspecified
GRMZM2G147942	1	32836003	32838941	6.40947	2.55783	5.76719	8.41446	8.44389	protein.degradation.subtilases
GRMZM2G077942	1	32867954	32871278	36.1051	49.3881	67.7638	70.7281	74.077	cell.organisation
GRMZM2G165921	1	32989160	32990423	0	0	0	0	0	not assigned.unknown
GRMZM2G165926	1	32992224	32999501	56.5488	40.9258	43.1882	56.6713	57.3661	protein.degradation.ubiquitin
GRMZM2G108138	1	33111216	33118409	2.58854	4.87822	2.63582	3.32637	3.83681	lipid metabolism.FA synthesis and FA elongation.acyl-CoA binding protein
GRMZM2G108032	1	33121697	33125126	65.9869	2.07803	11.5672	11.8993	7.80993	not assigned.unknown
GRMZM2G346861	1	33214734	33217244	0	0	0.238476	0.0240564	0.148085	stress.biotic
GRMZM2G159110	1	33267308	33270615	8.25746	5.04786	5.63875	6.53679	9.02276	stress.biotic
GRMZM2G149481	1	33317542	33321538	16.4545	53.242	99.3517	136.441	147.741	transport.amino acids
AC177947.2_FG003	1	33355136	33355748	0.099918	0.230759	0.101427	0.0327911	0.170348	not assigned.unknown
GRMZM2G448368	1	33408582	33409730	1.46051	0.214882	0.327534	0.535499	1.18053	stress.abiotic.heat
GRMZM2G149624	1	33414926	33416120	0	0	0	0	0	cell wall.cell wall proteins.proline rich proteins
GRMZM2G149636	1	33422636	33424854	0.518493	7.39675	2.26145	1.53363	2.56121	lipid metabolism.FA synthesis and FA elongation.beta ketoacyl CoA synthase
GRMZM2G149646	1	33456801	33458639	0.082634	0	0.0236742	0.0314017	0.0804717	not assigned.unknown
GRMZM2G149647	1	33459255	33460463	157.478	0.246335	0.363865	0.390267	0.251121	stress.abiotic.heat
GRMZM2G042253	1	33470701	33474591	0.0247995	0.0684231	0.059983	0.128754	0.143343	protein.folding
GRMZM2G172537	1	33524538	33527414	12.4525	18.228	18.678	16.6397	13.9876	misc.beta 1,3 glucan hydrolases
GRMZM2G519417	1	33583385	33583532	0	0	0	0	0	not assigned.unknown
GRMZM2G165944	1	33717962	33725898	22.3872	24.798	21.4771	26.3849	36.7559	not assigned.unknown
GRMZM2G110913	1	33796914	33799183	1.12963	2.8238	3.76724	3.66391	8.33592	RNA.regulation of transcription.AS2,Lateral Organ Boundaries Gene Family
GRMZM2G410603	1	33822925	33824400	0	0	0	0	0	not assigned.unknown
GRMZM2G110023	1	33825378	33831090	3.68138	5.00063	4.01351	4.57194	4.03797	protein.targeting.unknown
GRMZM2G110004	1	33831812	33834240	6.14545	3.35973	3.35908	4.189	4.2616	not assigned.unknown
GRMZM2G035552	1	33878530	33881481	1.58858	4.60548	4.66976	3.83167	2.35521	not assigned.unknown
GRMZM2G035461	1	33883144	33890486	5.42349	10.2918	8.54646	8.22877	7.59831	protein.degradation.autophagy
GRMZM2G321033	1	33952765	33956487	0.51826	2.9791	2.41832	2.90888	1.36451	misc.cytochrome P450
GRMZM2G703543	1	34105954	34106272	0	0	0	0	0	not assigned.unknown
AC212209.2_FG010	1	34114185	34115112	0	0	0	0	0	not assigned.unknown
GRMZM2G019689	1	34153293	34155652	1.88228	2.17976	2.22944	2.53744	2.56706	RNA.regulation of transcription.MYB domain transcription factor family
GRMZM2G179907	1	34203176	34204986	9.01327	1.52899	1.79549	1.30002	1.60573	not assigned.unknown
GRMZM2G170532	1	34205518	34209569	6.38467	6.5637	7.57007	8.2754	9.17192	protein.synthesis.release
GRMZM2G170382	1	34252929	34256994	23.9843	24.4106	25.9974	26.1944	25.9565	transport.unspecified anions
GRMZM2G170336	1	34312024	34322470	98.2599	81.2946	90.4225	83.1549	80.7176	cell wall.precursor synthesis.GAE
GRMZM2G358899	1	34369696	34370397	0	0	0	0	0	not assigned.unknown
GRMZM2G102483	1	34386069	34400554	0.0316036	0.180627	0.0633265	0.122407	0.221413	signalling.calcium
GRMZM2G102347	1	34405243	34408863	21.6401	10.6066	17.4493	24.1118	26.3629	hormone metabolism.abscisic acid.synthesis-degradation
AC214841.3_FG009	1	34515262	34515772	0	0	0	0	0	not assigned.unknown
GRMZM2G089812	1	34594745	34596756	0	0	0	0	0	RNA.regulation of transcription.CCAAT box binding factor family, HAP5
GRMZM2G472473	1	34618106	34618540	2.85752	2.17441	2.77772	3.09447	4.59012	not assigned.unknown
GRMZM2G171736	1	34621917	34624942	0	0.0949425	0.064086	0.053362	0.135764	signalling.light
GRMZM2G058910	1	34653686	34661237	29.6078	27.4138	25.1256	25.889	22.4611	transport.p- and v-ATPases
GRMZM2G359879	1	34660615	34663923	0.0335115	0	1.07665e-23	0	0	signalling.calcium
GRMZM2G058870	1	34664607	34673432	31.5371	20.6035	19.596	22.9823	26.9515	signalling.G-proteins
GRMZM2G355450	1	34715607	34717855	9.03293	6.21316	6.65102	7.962	7.66344	protein.postranslational modification.kinase.receptor like cytoplasmatic kinase X
GRMZM2G087275	1	34821544	34826523	6.1085	6.79265	4.53547	4.37549	4.13513	lipid metabolism.exotics (steroids, squalene etc).sphingolipids
GRMZM2G097788	1	34895449	34896384	0.104918	0	0.062927	0.0402403	0	RNA.regulation of transcription.MYB-related transcription factor family
GRMZM2G019260	1	34936119	34946016	39.1367	25.3917	22.4027	24.3865	24.723	secondary metabolism.isoprenoids.mevalonate pathway.phosphomevalonate kinase
GRMZM2G019567	1	34955986	34957951	1.70686	0.909737	1.48432	2.31519	2.24204	protein.postranslational modification
GRMZM5G808271	1	34964562	34965382	0	0	0	0	0	not assigned.unknown
GRMZM2G138103	1	34969589	34970683	26.763	39.6757	29.8341	25.1183	25.6308	not assigned.unknown
GRMZM2G377647	1	34994621	34996281	0	0.249793	0.171306	0.808525	1.36399	not assigned.unknown
GRMZM2G174236	1	35042626	35055436	18.3417	14.3443	20.1227	21.2425	18.3597	not assigned.unknown
GRMZM2G136513	1	35132531	35136898	5.51038	12.4527	5.47023	3.4976	3.72624	stress.biotic
AC205100.3_FG001	1	35141958	35147250	0	0	0	0	0	glycolysis.cytosolic branch.pyrophosphate-fructose-6-P phosphotransferase
GRMZM2G332705	1	35148625	35149819	0	0	0	0	0	secondary metabolism.phenylpropanoids
GRMZM2G030223	1	35214344	35216784	4.44794	4.00281	5.41179	8.20193	8.73365	development.storage proteins
GRMZM2G030422	1	35239929	35250929	36.9558	27.9581	27.8013	34.7611	39.429	stress.biotic
GRMZM2G025726	1	35330058	35331468	0	0	0.0169859	0.0489818	0.0594203	not assigned.unknown
GRMZM2G164562	1	35455267	35465683	38.3087	160.332	80.044	58.0121	47.6572	amino acid metabolism.synthesis.aromatic aa.chorismate.chorismate synthase
GRMZM5G899202	1	35490524	35492523	0	0	0	0	0	not assigned.unknown
GRMZM5G860152	1	35496720	35500398	6.44646	8.08609	7.15024	8.22001	6.58099	protein.degradation.ubiquitin.E3.RING
GRMZM2G127213	1	35575711	35576125	0.706661	0.168245	0.112692	0.513605	1.02882	signalling.light
GRMZM2G127123	1	35577458	35584230	1.40047	4.90391	7.72166	9.89156	7.94829	misc.gluco-, galacto- and mannosidases.beta-galactosidase
GRMZM2G050825	1	35654553	35661876	0.982105	0.742601	0.681006	0.767678	0.607809	not assigned.unknown
GRMZM2G001663	1	35734146	35739117	0.753263	2.7549	1.49382	1.76909	1.40705	signalling.light
GRMZM2G001696	1	35739883	35744291	0.349023	3.98019	1.15017	2.33563	3.15774	gluconeogenese/ glyoxylate cycle.PEPCK
GRMZM2G001814	1	35762787	35765122	1.78497	1.2856	0.885967	1.44433	1.33094	lipid metabolism.Phospholipid synthesis.phosphatidylserine decarboxylase
GRMZM2G341309	1	35768409	35771730	0	1.06541	3.55736	2.56128	1.49034	not assigned.unknown
GRMZM5G815823	1	35808485	35814130	0	0	0	0	0	not assigned.unknown
GRMZM2G474407	1	35832771	35833538	0.244567	0.117982	0	0.515571	0.476751	not assigned.unknown
AC177941.3_FG006	1	35848135	35848949	0	0	0	0	0	not assigned.unknown
GRMZM2G174615	1	35887737	35888916	0	9.84896	3.80864	2.73256	1.72864	not assigned.unknown
GRMZM2G174589	1	35919767	35937067	17.6249	12.5245	14.5851	11.9013	12.2002	amino acid metabolism.synthesis.histidine.N-5-phosphoribosyl-formimino-5-aminoimidazole-4-carboxamide ribonucleotide isomerase
AC177941.3_FG001	1	35960129	35962613	0.0289561	0	0	0	0	not assigned.unknown
GRMZM5G872118	1	35987857	35992888	21.9105	17.9923	21.9024	23.3707	21.9676	not assigned.unknown
GRMZM2G338691	1	36152969	36155243	0.114646	0.769027	0.197793	0.224805	0.322336	misc.myrosinases-lectin-jacalin
AC214040.3_FG009	1	36155685	36157670	0.18273	0.120211	0.168839	0.2548	0.375598	misc.myrosinases-lectin-jacalin
GRMZM2G338702	1	36157377	36161378	18.1754	19.7003	20.9981	21.6037	22.0642	not assigned.unknown
GRMZM2G360429	1	36213702	36214252	18.9815	17.1072	23.0879	21.8674	15.4816	not assigned.unknown
GRMZM2G060138	1	36215448	36217177	0.480819	1.48584	0.573889	0.801789	0.91632	not assigned.unknown
GRMZM2G060148	1	36220060	36222793	2.00612	0.594337	0.98518	1.00611	0.996081	not assigned.unknown
GRMZM2G123595	1	36289838	36290422	0	0	0	0	0	not assigned.unknown
GRMZM2G063733	1	36345667	36347747	7.35463	4.52431	2.62164	1.78689	1.29867	Biodegradation of Xenobiotics
GRMZM2G352678	1	36419514	36420602	13.4535	0	0.139924	0.392371	0	misc.plastocyanin-like
GRMZM2G052728	1	36434464	36444054	0	0.0134485	0	0	0	RNA.regulation of transcription.AtSR Transcription Factor family
GRMZM2G372398	1	36497244	36514437	9.3286	11.8112	9.54517	10.7511	9.76906	not assigned.unknown
GRMZM5G884432	1	36565033	36569148	4.74322	5.52088	5.00783	4.18369	3.03352	not assigned.unknown
GRMZM5G840610	1	36569337	36570374	3.66326	3.79527	1.76888	3.26455	3.0663	not assigned.unknown
AC209675.3_FG001	1	36693698	36693953	0	0	0	0	0	not assigned.unknown
GRMZM2G150827	1	36799945	36802271	0.156259	0.139638	0.0464635	0.00747665	0	misc.dynamin
GRMZM2G072492	1	36830814	36832864	0.149007	0.0438815	0.02647	0.0433518	0.0458839	misc.dynamin
AC217351.3_FG010	1	36837011	36837761	0	0	0	0	0	not assigned.unknown
GRMZM2G072456	1	36851269	36853587	0	0	0	0	0	RNA.regulation of transcription.putative transcription regulator
GRMZM2G372509	1	36873969	36876153	0	0	0	0	0	not assigned.unknown
GRMZM2G372502	1	36892087	36894624	0	0	0	0.0221827	0	minor CHO metabolism.galactose.alpha-galactosidases
GRMZM2G372495	1	36897540	36899006	2.8402	1.10161	0	0.51129	2.60131	not assigned.unknown
GRMZM2G072376	1	36916663	36917486	0.275085	1.54957	2.21566	2.36069	0.981948	not assigned.unknown
GRMZM2G072342	1	36917762	36919163	0	0	0.425369	0.396172	0.114317	RNA.regulation of transcription.bHLH,Basic Helix-Loop-Helix family
GRMZM2G105362	1	36972995	36974974	0.107752	0.396	0.246426	0.254675	0.727831	lipid metabolism.lipid degradation.lysophospholipases.phospholipase A2
GRMZM5G878205	1	36989792	36989921	0	0	0	0	0	not assigned.unknown
GRMZM2G339344	1	37093348	37096936	0	0	0	0	0	not assigned.unknown
GRMZM2G703555	1	37107099	37112311	38.7822	32.9166	35.755	41.4027	36.9284	stress.abiotic.heat
GRMZM5G883632	1	37132156	37134132	1.26396	0.932919	0.556993	0.296008	0.386123	not assigned.unknown
GRMZM2G408305	1	37202145	37215962	18.9902	15.7921	16.7786	16.1972	18.4568	protein.targeting.nucleus
GRMZM2G073591	1	37314956	37319041	5.48226	6.43772	11.1022	12.4605	14.2519	signalling.phosphinositides.phosphatidylinositol-4-phosphate 5-kinase
GRMZM2G143655	1	37407445	37412529	13.4371	17.5705	21.3975	21.2719	22.807	not assigned.unknown
GRMZM2G066120	1	37466205	37471599	2.77269	4.07646	3.18687	3.19529	3.1719	protein.postranslational modification
AC215240.3_FG003	1	37533128	37533608	0	0	0	0	0	not assigned.unknown
GRMZM2G048703	1	37540904	37551916	64.8477	59.4736	62.0606	68.654	70.9616	protein.synthesis.initiation
GRMZM2G014419	1	37664544	37665997	32.7454	20.456	16.1306	16.1552	13.1794	not assigned.unknown
GRMZM2G014323	1	37667523	37685753	0	0	0	0	0	protein.postranslational modification
AC226346.2_FG004	1	37705405	37706381	0	0	0	0	0	not assigned.unknown
GRMZM2G015281	1	37716916	37717648	0	0	0.098395	0.118132	0	RNA.regulation of transcription.AP2/EREBP, APETALA2/Ethylene-responsive element binding protein family
GRMZM2G055263	1	37804755	37806453	0.113817	0	0.202616	0.232607	0.219853	RNA.regulation of transcription.GRAS transcription factor family
GRMZM2G418575	1	37838674	37840955	0	0	0	0	0	not assigned.unknown
GRMZM2G118208	1	37841936	37850322	13.7348	16.8843	15.7704	14.5495	13.1248	transport.metabolite transporters at the mitochondrial membrane
GRMZM2G100620	1	37871144	37874606	46.8607	32.6185	39.2966	41.8165	41.5287	not assigned.unknown
GRMZM2G151582	1	37942749	37946337	16.6254	22.0915	22.2179	21.3701	17.7397	not assigned.unknown
GRMZM2G151576	1	37997640	38007833	19.995	12.604	12.5813	15.9658	15.6153	protein.degradation.ubiquitin.E3.RING
GRMZM2G151564	1	38008532	38011706	7.91871	9.10996	5.47563	6.52538	7.3714	signalling.calcium
GRMZM2G151521	1	38053958	38061419	3.45552	4.09949	3.43723	3.47227	3.53423	lipid metabolism.exotics (steroids, squalene etc).sphingolipids
GRMZM2G161452	1	38120359	38124242	6.14927	10.0715	7.26831	8.05061	7.98733	signalling.receptor kinases.leucine rich repeat VIII-2
GRMZM2G161337	1	38124979	38130704	33.4567	32.2983	29.3135	33.4779	31.7	amino acid metabolism.synthesis.aromatic aa.tryptophan.anthranilate synthase
GRMZM2G093305	1	38186967	38189062	0.23803	1.11179	1.38638	1.16081	1.00421	RNA.regulation of transcription.C2H2 zinc finger family
GRMZM2G093217	1	38191740	38205252	12.0661	4.72833	7.17311	8.01943	8.05822	protein.degradation.AAA type
GRMZM2G049190	1	38243674	38249171	4.16502	3.04726	3.02002	3.94933	4.561	lipid metabolism.glycolipid synthesis.sulfolipid synthase
GRMZM2G049041	1	38249829	38252655	3.55442	7.89771	6.41304	6.19768	6.45431	not assigned.unknown
GRMZM2G397002	1	38309565	38310330	0	0.182866	0	0	0	protein.synthesis.ribosomal protein.unknown.small subunit.S25
GRMZM2G540403	1	38311411	38323325	21.0824	30.9627	25.6964	29.4722	29.5495	protein.synthesis.ribosomal protein.prokaryotic.chloroplast.50S subunit.L4
GRMZM2G079112	1	38443626	38446781	9.17076	9.18845	12.4121	12.9431	12.6366	protein.degradation.ubiquitin.E3.SCF.FBOX
GRMZM2G012319	1	38536340	38548191	22.0382	18.0815	20.8929	22.8255	24.9682	not assigned.unknown
GRMZM2G012566	1	38547956	38550734	0.0934244	0	0.0869905	0.0624288	0.220407	not assigned.unknown
AC217897.3_FG010	1	38548793	38549201	0.212428	0	1.28597e-59	0.258688	2.39356e-77	not assigned.unknown
GRMZM2G128444	1	38609563	38613820	9.04355	6.10417	8.13344	11.9734	12.2665	not assigned.unknown
GRMZM2G128206	1	38616856	38624277	41.74	37.5255	41.6499	49.1775	57.4583	development.unspecified
GRMZM2G426271	1	38625397	38628102	3.6074	2.2505	2.10182	2.5928	4.16177	not assigned.unknown
GRMZM2G128156	1	38626036	38626904	3.80674	2.34703	4.40564	3.58355	8.16824	protein.degradation.ubiquitin.E3.SCF.FBOX
GRMZM2G481529	1	38632793	38636740	2.1147	0.734152	1.25278	1.09038	1.62948	glycolysis.cytosolic branch.enolase
AC208204.3_FG006	1	38637064	38637541	782.534	102.918	26.582	36.2225	29.0823	stress.abiotic.heat
GRMZM2G046679	1	38719125	38720722	0.307362	0.695723	0.348762	0.480817	1.13318	glycolysis.cytosolic branch.enolase
GRMZM2G046382	1	38719938	38720992	298.615	25.6106	9.1268	13.862	12.2931	stress.abiotic.heat
GRMZM2G046274	1	38725744	38739788	4.63188	3.49838	2.78998	3.5183	3.50323	cell.vesicle transport
GRMZM5G886952	1	38786726	38795353	21.8869	18.4949	18.3199	19.6402	20.3417	signalling.receptor kinases.leucine rich repeat XI
GRMZM2G306679	1	38847218	38848169	166.526	0.523047	0.178111	0.0252044	0.130509	stress.abiotic.heat
GRMZM2G306732	1	38848594	38850785	0	0	0	0.0204158	0.0706378	PS.calvin cycle.FBPase
AC204035.3_FG003	1	38852181	38852820	0	0	0	0	0	not assigned.unknown
GRMZM2G007055	1	38869487	38872644	0	2.75019	1.66874	1.21097	0.749295	not assigned.unknown
GRMZM2G306806	1	38874507	38880083	8.41057	18.1658	9.07336	12.4238	15.0188	not assigned.unknown
GRMZM2G160198	1	39036063	39039903	0.410594	0.431961	0.713251	0.498604	0.915554	not assigned.unknown
GRMZM2G160237	1	39043377	39051301	30.8976	30.4605	36.1195	49.9523	57.5737	protein.postranslational modification
GRMZM2G160324	1	39052435	39057937	6.48189	5.2833	5.64405	6.69746	6.66663	cell.organisation
GRMZM2G160428	1	39059858	39066480	8.92542	13.9242	8.39021	11.013	11.058	protein.postranslational modification
GRMZM2G160452	1	39067580	39073248	7.80608	9.60778	10.3897	12.0857	13.8579	lipid metabolism.glycolipid synthesis.DGDG synthase
GRMZM2G160506	1	39110589	39113895	53.5366	29.0203	27.7148	38.6702	46.6107	cell wall.precursor synthesis.NDP sugar pyrophosphorylase.GDP mannose
GRMZM2G010855	1	39139490	39141597	105.362	17.8137	6.09927	5.54824	5.5933	protein.postranslational modification
GRMZM2G141799	1	39213216	39219522	25.7837	37.7826	32.5429	39.3131	36.8866	misc.nitrilases, *nitrile lyases, berberine bridge enzymes, reticuline oxidases, troponine reductases
GRMZM2G061202	1	39243253	39248781	5.45359	0.742678	0.481602	0.517622	1.45549	not assigned.unknown
GRMZM2G119168	1	39332348	39333847	0.716074	3.90449	1.57999	1.85242	1.71928	RNA.regulation of transcription.putative transcription regulator
GRMZM2G356459	1	39396384	39398924	0	0	0	0	0	stress.abiotic.heat
GRMZM2G057646	1	39402470	39410090	43.1377	34.4072	34.742	37.9211	43.0738	RNA.processing.splicing
GRMZM2G441511	1	39443354	39451266	0	0	0	0	0	signalling.calcium
GRMZM2G320960	1	39601249	39602562	1.22022	1.81073	0.50452	0.878777	0.207611	not assigned.unknown
GRMZM2G391908	1	39648987	39649251	0	0	0	0	0	not assigned.unknown
GRMZM2G100086	1	39675557	39678308	0	0	0	0	0	RNA.transcription
GRMZM2G001918	1	39732002	39737097	32.1701	22.068	26.9599	24.4851	27.2667	protein.targeting.chloroplast
GRMZM5G804658	1	39738037	39743446	14.5875	2.72632	1.79734	1.37905	1.1831	not assigned.unknown
GRMZM5G836424	1	39738413	39739817	3.45448e-130	1.15931e-35	1.54734e-28	2.70733e-13	2.53031e-69	not assigned.unknown
GRMZM5G828820	1	39747672	39749019	21.8695	5.96697	4.62105	5.5217	3.64101	protein.degradation.ubiquitin.E3.RING
GRMZM2G026911	1	39756845	39758525	0	0	0	0.0280909	0.284298	RNA.regulation of transcription.unclassified
GRMZM2G026959	1	39785434	39786527	0	0	0	0	0	not assigned.unknown
GRMZM2G703559	1	39796398	39796698	0	0	0	0	0	not assigned.unknown
GRMZM2G337425	1	39802493	39808559	8.39716	5.07175	7.02405	8.26273	9.39822	protein.degradation.ubiquitin.E3.RING
GRMZM2G109831	1	39843563	39844876	5.67463	12.3582	8.85126	10.8158	11.9594	not assigned.unknown
GRMZM2G109885	1	39848178	39855614	22.8993	26.0022	30.7732	33.2098	38.2368	RNA.regulation of transcription.unclassified
GRMZM2G408887	1	39872835	39874104	0	0	0	0	0	RNA.regulation of transcription.unclassified
GRMZM2G110413	1	39890932	39891608	1.17578	2.13844	2.14954	1.85068	2.40079	not assigned.unknown
GRMZM2G078164	1	39904164	39905212	0.990268	7.15001	5.17662	5.16113	4.06557	not assigned.unknown
GRMZM2G305526	1	39928337	39931744	0	0	0	0	0	secondary metabolism.simple phenols
GRMZM2G179432	1	40058238	40060508	0.585049	10.7501	14.8561	20.8347	20.4718	not assigned.unknown
GRMZM2G049159	1	40139022	40143020	17.265	7.68	8.32063	8.75902	11.3626	RNA.regulation of transcription.GRAS transcription factor family
GRMZM2G350001	1	40187907	40194235	0.0286242	0.166403	0.127605	0.0683334	0	not assigned.unknown
GRMZM2G174644	1	40222142	40226699	46.2124	49.5168	39.6349	42.2009	40.9216	cell.vesicle transport
GRMZM2G110309	1	40352196	40357695	7.72199	4.17769	2.6119	2.34806	2.52712	DNA.synthesis/chromatin structure
GRMZM2G087600	1	40415189	40421518	33.5765	26.4284	31.4513	38.7995	47.019	not assigned.unknown
GRMZM2G087459	1	40421674	40424815	16.355	6.7706	7.51727	9.4952	13.2819	protein.postranslational modification.kinase.receptor like cytoplasmatic kinase VII
GRMZM2G112925	1	40511638	40514803	0.990492	0.297729	0.30571	0.359462	0.303137	protein.postranslational modification
GRMZM2G113002	1	40567846	40571079	6.51124	2.255	3.73006	3.50825	4.94447	cell.organisation
GRMZM2G043030	1	40644593	40649751	10.3372	10.2468	10.9536	11.2357	12.5063	RNA.regulation of transcription.unclassified
GRMZM2G160906	1	40725929	40729127	8.17077	7.31705	6.4593	7.39419	8.4764	not assigned.unknown
GRMZM5G801409	1	40803770	40807003	20.3606	14.6732	17.2995	14.7822	15.536	protein.synthesis.ribosomal protein.eukaryotic.60S subunit.L3
GRMZM5G891990	1	40808207	40813039	16.3655	4.22521	5.09723	8.76365	10.1342	protein.degradation.ubiquitin.E3.RING
AC233935.1_FG005	1	40912997	40914398	0.19307	0.057533	0	0.0919865	0.11791	RNA.regulation of transcription.C2C2(Zn) DOF zinc finger family
GRMZM5G894709	1	40963713	40967129	0	0	0	0	0	not assigned.unknown
AC213668.4_FG008	1	41085032	41086870	0	0	0	0	0	not assigned.unknown
GRMZM2G428391	1	41101053	41103817	47.1414	4.60865	3.82278	3.22819	2.01736	stress.abiotic.heat
GRMZM2G428410	1	41103803	41106791	24.1945	30.3114	31.7672	31.3168	29.1904	not assigned.unknown
AC213668.4_FG007	1	41210254	41210641	0	0	0	0	0	not assigned.unknown
GRMZM2G145275	1	41217231	41221207	3.63134	1.16068	0.950793	0.62283	1.69465	stress.abiotic.heat
GRMZM2G096261	1	41237114	41238937	33.2691	23.5538	29.6626	31.4746	29.115	not assigned.unknown
GRMZM2G096231	1	41239205	41240733	0.180877	0.160579	0.51141	0.454714	0.552049	misc.UDP glucosyl and glucoronyl transferases
GRMZM2G048482	1	41275718	41278822	17.4	36.0027	28.5517	27.5573	25.93	stress.abiotic
GRMZM2G441827	1	41284837	41321257	0.0629135	0.138587	0.177714	0.165296	0	RNA.regulation of transcription.SBP,Squamosa promoter binding protein family
GRMZM2G172574	1	41376930	41378234	0.687248	6.11705	8.65993	15.532	16.8527	Biodegradation of Xenobiotics.lactoylglutathione lyase
GRMZM2G043857	1	41427932	41431457	0.858356	16.0912	4.99585	3.46174	4.04606	cell.organisation
GRMZM2G043878	1	41436542	41437697	0	44.0555	17.771	11.2052	10.2118	signalling.receptor kinases.DUF 26
GRMZM2G043976	1	41441329	41442027	0	0	0	0	0	not assigned.unknown
GRMZM2G044027	1	41468888	41473581	61.1712	134.988	93.9562	93.0368	82.6484	cell wall.precursor synthesis.UXS
GRMZM2G044281	1	41480269	41483936	12.7615	12.4987	9.68635	13.4771	18.5052	cell wall.precursor synthesis.UDP-glucose 4,6-dehydratase
GRMZM2G345330	1	41480281	41483601	0.658	0.261148	0.323936	0.302939	0.427281	cell wall.precursor synthesis.UDP-glucose 4,6-dehydratase
GRMZM2G157329	1	41535739	41540223	17.94	16.0924	19.8775	20.71	20.1119	RNA.RNA binding
GRMZM5G843781	1	41725058	41726236	0	0	0	0	0	not assigned.unknown
GRMZM2G119886	1	41759284	41762638	23.7518	39.8583	32.6847	34.254	35.4718	RNA.regulation of transcription.unclassified
GRMZM2G077797	1	41850831	41852741	1.26377	1.35366	1.21912	1.12489	1.22863	RNA.RNA binding
GRMZM2G078052	1	41854156	41863804	7.68839	9.50549	8.76057	9.60096	11.7059	RNA.regulation of transcription.PHD finger transcription factor
GRMZM2G044237	1	41956653	41966584	40.3445	50.4436	49.3384	55.8234	58.3372	amino acid metabolism.synthesis.glutamate family.arginine.acetylglutamate kinase
GRMZM2G343778	1	41967961	41971527	0	0	0	0	0	not assigned.unknown
GRMZM2G150729	1	42011013	42013283	0.702422	31.7896	18.3605	9.03397	9.65625	hormone metabolism.ethylene.induced-regulated-responsive-activated
GRMZM2G150697	1	42020107	42021268	27.8243	29.5132	27.5887	26.5378	27.0325	not assigned.unknown
GRMZM2G048154	1	42121562	42122262	0	3.57376	2.07212	3.06959	3.41911	RNA.regulation of transcription.C2H2 zinc finger family
GRMZM2G171232	1	42164530	42166924	16.9187	15.8693	15.5576	16.5613	18.0217	protein.degradation.ubiquitin.E3.RING
GRMZM2G471904	1	42169708	42185861	12.2054	4.68161	6.22129	8.48371	10.1958	PS.lightreaction.photosystem II.PSII polypeptide subunits
GRMZM2G401769	1	42186628	42192907	4.31434	5.10492	3.40261	3.87084	5.17244	transport.ABC transporters and multidrug resistance systems
GRMZM2G096424	1	42289909	42307891	18.5268	18.9307	19.8117	18.3822	16.855	protein.synthesis.ribosomal protein.prokaryotic.unknown organellar.30S subunit.S18
GRMZM2G026910	1	42476812	42477961	0.869034	0.714873	2.08363	3.35485	1.46989	not assigned.unknown
GRMZM2G026654	1	42487646	42491363	2.42767	4.09194	3.58476	3.68403	4.23557	not assigned.unknown
GRMZM2G338333	1	42514664	42517691	3.3484	9.92395	5.13105	6.44045	7.14196	cell.organisation
GRMZM2G042107	1	42519508	42522612	0	0.26038	0.234312	0.184963	0	cell.organisation
AC226231.2_FG002	1	42725356	42726381	0	0	0	0	0.324967	not assigned.unknown
GRMZM2G703561	1	42749646	42750771	0	0.110506	0	0	0	not assigned.unknown
GRMZM2G017103	1	42776102	42776662	0	0.118934	0	0	0	not assigned.unknown
GRMZM2G396674	1	42807193	42808721	0.337182	0.409492	0.188965	0.189978	0.123159	not assigned.unknown
GRMZM2G141704	1	42845339	42850982	58.3045	117.141	90.1114	64.9786	48.2757	transport.calcium
GRMZM2G442277	1	42845850	42848783	2.70866e-17	8.07154e-31	2.60174e-23	7.22395e-28	5.06577e-45	signalling.receptor kinases.Catharanthus roseus-like RLK1
GRMZM2G428096	1	42851133	42852518	57.6751	89.9207	54.5772	57.8351	56.9519	transport.calcium
AC202101.3_FG002	1	42872323	42873262	0	0	0	0	0	not assigned.unknown
GRMZM2G136268	1	42921400	42926733	3.47175	2.70261	2.89956	3.54849	3.93357	not assigned.unknown
GRMZM2G054332	1	43054781	43057900	0.0263915	0	0.0600709	0.145377	0.688142	transport.ABC transporters and multidrug resistance systems
GRMZM2G352883	1	43059253	43061315	12.8527	16.4137	16.0188	15.0376	14.4389	not assigned.unknown
GRMZM5G873286	1	43062090	43064652	8.50189	8.06076	7.09315	7.99826	8.74463	not assigned.unknown
GRMZM2G041989	1	43084553	43089338	5.87067	8.37923	8.05645	9.52694	10.8087	not assigned.unknown
GRMZM2G338131	1	43105535	43107806	0.0346351	0.862607	0.641871	0.550848	0.0588715	misc.glutathione S transferases
GRMZM2G043291	1	43109843	43112305	21.2779	16.7969	9.64727	8.45738	3.96074	misc.glutathione S transferases
GRMZM2G042639	1	43120332	43122426	22.2344	898.529	956.201	620.659	401.571	misc.glutathione S transferases
GRMZM2G042543	1	43125683	43128855	0	0	0	0	0	misc.cytochrome P450
GRMZM2G042032	1	43133286	43136676	67.2323	40.9552	45.502	48.1596	50.4401	not assigned.unknown
GRMZM2G338037	1	43136708	43139853	10.1503	1.6114	4.87579	5.44591	4.2585	not assigned.unknown
GRMZM2G041955	1	43147984	43150905	1.30917	1.18797	1.48749	1.3515	1.38154	RNA.regulation of transcription.MYB domain transcription factor family
GRMZM2G109967	1	43229322	43236661	11.8481	13.1159	13.9005	13.2196	12.6382	lipid metabolism.Phospholipid synthesis.phosphatidate cytidylyltransferase
GRMZM2G154883	1	43344062	43358846	8.29782	8.63012	9.54627	9.48351	9.9799	signalling.G-proteins
AC217300.3_FG004	1	43392598	43398272	0.0302913	0	0.101171	0.0108319	0	protein.postranslational modification.kinase.receptor like cytoplasmatic kinase VII
AC217300.3_FG005	1	43420854	43421523	4.19881	4.39391	3.48863	3.19062	1.80016	protein.synthesis.ribosomal protein.prokaryotic.chloroplast.50S subunit.L10
GRMZM2G052479	1	43493248	43504265	13.5541	9.29623	11.4418	10.6744	10.884	not assigned.unknown
GRMZM2G052581	1	43505288	43508277	14.0426	12.6733	11.7212	11.9187	10.1245	DNA.synthesis/chromatin structure
AC202041.4_FG003	1	43507855	43508938	0	0.0871605	0	1.41054e-17	0	not assigned.unknown
GRMZM2G030880	1	43547141	43555047	4.85904	9.54819	9.49595	9.82751	9.12979	protein.synthesis.misc ribosomal protein
GRMZM2G137839	1	43678295	43681497	633.543	252.113	149.768	123.044	149.959	redox.ascorbate and glutathione.ascorbate
GRMZM5G876973	1	43682051	43684192	0.113112	0	0	0	0	cell.vesicle transport
GRMZM2G017792	1	43685603	43688500	2.19369	3.68058	1.90165	1.60992	1.08426	signalling.MAP kinases
GRMZM2G141273	1	43750381	43758181	12.4559	18.1213	17.1342	16.4727	15.186	amino acid metabolism.synthesis.aromatic aa.phenylalanine.arogenate dehydratase / prephenate dehydratase
GRMZM2G443265	1	43760835	43764158	11.9777	53.7899	31.0389	29.3143	23.993	transport.metabolite transporters at the envelope membrane
GRMZM2G141386	1	43764763	43767544	3.97641	3.94417	6.19292	5.60991	5.59637	RNA.RNA binding
GRMZM2G179411	1	43971020	43974939	10.146	8.39166	8.35046	10.3838	16.7036	RNA.regulation of transcription.putative transcription regulator
GRMZM2G179462	1	43981859	43982653	0	0	0	0	0	stress.abiotic.drought/salt
GRMZM2G319781	1	44027291	44029718	0	0.48158	0.797444	0.217661	0.259751	not assigned.unknown
GRMZM2G021095	1	44161417	44162532	0	0.09355	0	0.110798	0	RNA.regulation of transcription.AS2,Lateral Organ Boundaries Gene Family
GRMZM2G001079	1	44176428	44180394	0	2.09185	0.740521	0.482375	1.67065	protein.glycosylation
GRMZM2G443655	1	44186788	44187344	0.473946	0.272225	0.864021	0.822256	1.17792	not assigned.unknown
GRMZM2G073628	1	44191573	44193231	2.79343	7.43602	6.18534	6.53276	6.49971	redox.thioredoxin
GRMZM2G158197	1	44326721	44331993	11.3429	10.2696	8.33892	8.74039	7.85802	not assigned.unknown
GRMZM2G158261	1	44335129	44339635	19.3486	19.0157	26.5081	27.3334	31.5732	protein.aa activation.pseudouridylate synthase
GRMZM2G065552	1	44339859	44340751	9.61669	12.2061	16.226	16.4036	20.2397	protein.aa activation.pseudouridylate synthase
GRMZM2G107731	1	44344085	44349439	18.8829	16.6087	19.8499	22.5192	23.1217	not assigned.unknown
GRMZM2G107838	1	44349621	44352638	8.29828	20.1141	14.602	13.4839	12.3109	misc.acid and other phosphatases
GRMZM2G107867	1	44367364	44373917	11.7069	32.1812	23.6786	19.5713	20.4379	protein.postranslational modification
GRMZM2G173251	1	44528826	44529892	14.7383	19.062	18.9384	16.4517	13.8913	TCA / org. transformation.other organic acid transformaitons.IDH
GRMZM2G024159	1	44531397	44542728	17.9461	16.7995	16.3658	13.9057	14.392	not assigned.unknown
GRMZM2G024440	1	44543520	44544030	0	0	0	0	0	not assigned.unknown
GRMZM5G876389	1	44652204	44653570	1.25904	0.744088	0.599299	0.425416	0.0634176	not assigned.unknown
GRMZM5G847302	1	44674257	44675623	0.856934	0.715197	0.42764	0.310895	0.378358	not assigned.unknown
GRMZM2G074401	1	44800824	44803738	6.38094	18.8674	7.91951	8.39694	6.13913	lipid metabolism.FA desaturation.omega 3 desaturase
GRMZM2G305267	1	44867315	44868146	0.446362	0.120725	0.546355	0.190636	0	not assigned.unknown
GRMZM5G850850	1	44947009	44947491	0	0	0	0	0	not assigned.unknown
AC212219.3_FG005	1	44955002	44960551	0.0544725	4.67985	2.29334	1.44554	0.422682	secondary metabolism.flavonoids.anthocyanins
GRMZM2G114354	1	44996487	45005676	0.199136	0.056527	0.169675	0.259572	0.341686	signalling.phosphinositides.phosphoinositide phospholipase C
GRMZM2G380955	1	45090020	45093078	0	0	0	0	0.0936023	not assigned.unknown
AC208436.3_FG007	1	45099019	45105645	4.89408	2.62523	2.82393	3.57221	4.62881	RNA.regulation of transcription.PHD finger transcription factor
GRMZM2G053669	1	45114257	45118291	1.07588	117.301	34.0651	34.7061	19.8678	amino acid metabolism.synthesis.aspartate family.asparagine
AC208201.3_FG003	1	45337977	45340551	0	0	0	0	0.0956908	not assigned.unknown
AC208201.3_FG002	1	45366146	45367585	24.369	7.1037	8.39679	9.23174	9.31445	protein.postranslational modification
AC208201.3_FG001	1	45400060	45402643	6.40789	9.89526	8.36356	8.42171	7.02428	transport.metabolite transporters at the mitochondrial membrane
GRMZM2G459824	1	45425092	45426565	0.177483	0	0.225972	0.900978	0.444781	protein.postranslational modification
GRMZM2G094388	1	45438913	45441619	100.478	92.5139	113.448	119.376	103.028	signalling.G-proteins
GRMZM2G087079	1	45505193	45506420	0.465017	0.374469	0.401984	0.0767389	0.263914	protein.synthesis.ribosomal protein.unknown.unknown
GRMZM2G087161	1	45506616	45510218	5.73889	3.12005	4.50749	5.11505	6.79858	RNA.regulation of transcription.bHLH,Basic Helix-Loop-Helix family
GRMZM2G385021	1	45510989	45511749	0.085618	0.0812375	0.076458	0.06521	0.497923	not assigned.unknown
GRMZM2G087186	1	45512801	45515978	408.059	106.343	136.049	132.191	149.59	fermentation.PDC
GRMZM5G850640	1	45633024	45636266	0.303303	0.158962	0.222724	0.436951	0.675722	not assigned.unknown
GRMZM5G824405	1	45637087	45664775	16.3582	11.2709	11.7232	15.5615	15.3679	glycolysis.cytosolic branch.fructose-2,6-bisphosphatase (Fru2,6BisPase)
GRMZM2G313272	1	45693793	45699494	0	0	0	0	0	amino acid metabolism.synthesis.aspartate family.asparagine
AC196161.3_FG002	1	45740133	45740709	0	0	0	0	0	not assigned.unknown
GRMZM2G452695	1	45741643	45743277	0.58455	0.516543	0.569164	0.607731	0.957746	not assigned.unknown
AC196161.3_FG004	1	45749750	45750281	0	0	0	0	0	not assigned.unknown
GRMZM2G135456	1	45767891	45771609	0.0607185	0	0.0844887	0.0455553	0.209966	not assigned.unknown
GRMZM2G135359	1	45772225	45775457	2.34052	1.75708	2.17097	2.34991	2.86582	protein.postranslational modification.kinase.receptor like cytoplasmatic kinase I
GRMZM2G135337	1	45778436	45784829	4.93571	3.22654	4.54631	6.25742	6.35854	protein.degradation.ubiquitin.E1
GRMZM2G006085	1	45905298	45918921	36.0835	20.5095	23.8323	27.3522	21.3738	mitochondrial electron transport / ATP synthesis.NADH-DH.localisation not clear
GRMZM2G006370	1	45920335	45923687	4.58633	3.54895	3.06988	3.8217	3.61226	protein.postranslational modification
GRMZM2G307992	1	45928393	45938029	16.81	27.9302	28.2367	24.8499	16.6648	not assigned.unknown
GRMZM2G308034	1	45938196	45940618	3.28614	0	0	0	0	RNA.regulation of transcription.MYB domain transcription factor family
GRMZM2G006981	1	45941206	45942947	15.8057	4.51311	6.26006	7.69424	8.9591	not assigned.unknown
GRMZM2G007080	1	45943566	45946514	20.5984	15.7942	19.6822	18.8803	17.492	protein.targeting.mitochondria
GRMZM2G007206	1	45948843	45950156	5.42183	13.4876	9.34581	9.56907	10.8241	not assigned.unknown
GRMZM2G058138	1	46061767	46066293	51.3786	38.1106	42.9284	40.9449	36.4738	protein.synthesis.initiation
GRMZM2G110000	1	46073394	46079578	3.07851	1.01172	1.63871	1.84719	1.93249	protein.postranslational modification
GRMZM2G032182	1	46119594	46122942	12.6496	13.8006	10.0995	11.5477	16.2947	transport.metabolite transporters at the mitochondrial membrane
GRMZM2G032047	1	46124871	46126322	0.269856	6.47433	5.76282	4.42814	2.76935	not assigned.unknown
GRMZM2G030016	1	46126596	46129448	441.827	385.542	484.687	463.361	504.239	protein.synthesis.ribosomal protein.eukaryotic.40S subunit.S7
GRMZM2G029543	1	46134882	46138910	143.274	37.4836	50.813	44.8671	38.6848	lipid metabolism.FA synthesis and FA elongation.Acetyl CoA Transacylase
GRMZM2G373621	1	46211857	46221969	0	0	0	0	0	DNA.unspecified
GRMZM2G144224	1	46232263	46233515	0.472149	1.37355	0.668945	0.741483	1.17301	stress.abiotic.unspecified
GRMZM2G066274	1	46405876	46408841	14.7725	8.47192	9.53139	11.2153	12.7703	signalling.receptor kinases.leucine rich repeat III
GRMZM5G814718	1	46411400	46414414	0	0	0.0867515	0.054951	0	secondary metabolism.simple phenols
GRMZM2G365240	1	46418034	46418601	0	0	0	0	0	not assigned.unknown
GRMZM2G417082	1	46455869	46458427	1.30636	1.05122	2.1513	2.52105	2.63621	not assigned.unknown
GRMZM2G104373	1	46542946	46546531	31.9115	35.704	37.8271	42.8359	42.5685	protein.degradation.ubiquitin.proteasom
GRMZM2G104464	1	46549932	46555517	8.46671	8.24219	8.89521	8.62571	9.29097	not assigned.unknown
GRMZM2G104534	1	46576197	46582130	0.0342838	0.0165758	0.0362756	0.0746384	0.0264732	cell.organisation
GRMZM2G153450	1	46622334	46627171	18.0285	14.3066	15.9082	19.1054	18.1287	RNA.processing.splicing
GRMZM2G153531	1	46631752	46635229	0	0	0	0	0	not assigned.unknown
GRMZM2G455809	1	46678941	46680363	0.0897615	18.8011	3.98307	3.4538	3.28804	misc.short chain dehydrogenase/reductase (SDR)
GRMZM2G455828	1	46687521	46689522	397.094	419.609	546.904	423.072	396.711	protein.synthesis.ribosomal protein.eukaryotic.40S subunit.S28
GRMZM2G010909	1	46736923	46738122	6.81795	9.6283	15.6779	16.2913	11.4687	signalling.receptor kinases.misc
GRMZM2G010545	1	46840485	46844013	0.0545654	4.21113	2.32687	1.97544	0.822599	not assigned.unknown
GRMZM2G313934	1	46840621	46842381	0.23131	0.796107	0.354938	0.405874	1.53403	not assigned.unknown
GRMZM2G010328	1	46852657	46861936	26.885	32.8071	31.6039	33.2978	34.3478	amino acid metabolism.synthesis.aromatic aa.phenylalanine and tyrosine
GRMZM2G129302	1	46863230	46865595	1.12179	0.894373	1.06865	0.900283	1.12164	misc.UDP glucosyl and glucoronyl transferases
GRMZM2G113364	1	46925778	46930203	3.46476	5.91035	5.91212	6.19901	6.64375	RNA.regulation of transcription.unclassified
GRMZM2G095043	1	47130521	47135737	24.4	18.6389	21.5823	20.8473	24.5181	not assigned.unknown
GRMZM2G112538	1	47149320	47150335	0.384944	582.812	573.239	369.909	97.0259	stress.biotic
GRMZM2G112524	1	47172054	47173159	1.3777	478.129	396.851	251.006	69.1149	stress.biotic
GRMZM2G112488	1	47177905	47178782	0	9.97687	5.72186	2.96866	0.51391	stress.biotic
GRMZM2G412784	1	47179355	47184552	0	0	0	0	0	not assigned.unknown
GRMZM2G321753	1	47291534	47321106	14.5086	14.8329	13.8928	14.7292	14.996	protein.degradation.cysteine protease
GRMZM2G321870	1	47321326	47323363	0.0505015	0	0.0213979	0.22368	0.0968805	cell wall.pectin*esterases.PME
GRMZM2G016734	1	47325048	47326647	10.2647	4.31112	5.55172	6.56775	6.71558	stress.abiotic.heat
GRMZM2G017044	1	47331196	47332878	0	0	0	0	0	protein.degradation.ubiquitin.E3.SCF.FBOX
GRMZM2G169173	1	47369335	47370999	0	0	0	0	0	protein.degradation.ubiquitin.E3.SCF.FBOX
GRMZM2G169167	1	47387486	47389244	0.204597	0.168316	0.229203	0.201479	0.159005	protein.degradation.ubiquitin.E3.SCF.FBOX
GRMZM2G300692	1	47454599	47457339	1.37474	3.67677	2.5896	2.281	1.78318	misc.UDP glucosyl and glucoronyl transferases
GRMZM2G000632	1	47474644	47480040	3.08971	3.92454	3.37723	3.44598	3.30263	cell wall.precursor synthesis.MUR4
GRMZM2G377215	1	47504494	47507003	11.6735	21.0498	16.1188	13.9981	12.9028	cell wall.cellulose synthesis.COBRA
GRMZM2G076537	1	47509292	47517202	24.5544	19.3037	22.7486	22.1729	22.2841	DNA.unspecified
GRMZM2G427438	1	47593035	47595015	0.070635	0	0	0	0	RNA.regulation of transcription.C3H zinc finger family
GRMZM2G427418	1	47597258	47600865	0.103292	0.094563	0.241441	0.351279	0.197302	signalling.calcium
GRMZM2G122965	1	47699082	47705236	2.78979	0.616828	1.8679	3.33669	3.92409	cell.organisation
GRMZM2G036086	1	47810316	47811419	3.43351	4.26103	4.65012	4.34644	2.33617	not assigned.unknown
GRMZM5G807260	1	47827839	47828946	0.670775	0.246424	0.479961	0.486523	1.46361	not assigned.unknown
GRMZM2G162356	1	47900336	47901226	11.9405	6.73853	10.9787	10.151	9.3699	protein.degradation.ubiquitin.E3.SCF.RBX
GRMZM5G819965	1	47906015	47907112	9.7691	0.186617	0.700295	0.442461	0.379606	not assigned.unknown
GRMZM2G311465	1	47986775	47988982	0.0397532	1.13011	1.35441	0.978159	1.17184	not assigned.unknown
GRMZM2G017536	1	47989434	47993634	17.0511	5.6033	8.14203	9.94718	10.5478	not assigned.unknown
GRMZM2G017400	1	47993963	47995437	3.6111	1.89046	1.47286	1.33319	2.16104	not assigned.unknown
GRMZM2G129872	1	48006726	48007861	0	0	0	0	0	RNA.regulation of transcription.MYB domain transcription factor family
GRMZM2G016020	1	48010041	48010786	0	0	0	0	0	RNA.regulation of transcription.MYB domain transcription factor family
GRMZM2G335358	1	48019624	48020672	0	0	0	0	0	RNA.regulation of transcription.MYB domain transcription factor family
GRMZM2G057027	1	48092120	48097632	0	0	0	0	0	RNA.regulation of transcription.MYB domain transcription factor family
GRMZM2G064597	1	48107458	48108272	0	0	0	0	0	RNA.regulation of transcription.MYB domain transcription factor family
GRMZM2G084799	1	48117496	48128047	0	0	0	0	0	RNA.regulation of transcription.MYB domain transcription factor family
GRMZM2G111990	1	48139883	48141013	0	0	0	0	0	RNA.regulation of transcription.MYB domain transcription factor family
GRMZM2G112263	1	48158037	48158425	0	0	0	0	0	RNA.regulation of transcription.MYB domain transcription factor family
GRMZM2G066352	1	48232795	48238899	0	0	0	0	0	amino acid metabolism.synthesis.aromatic aa.phenylalanine and tyrosine
GRMZM2G452170	1	48359566	48360346	0	0.127681	0	0	0	not assigned.unknown
GRMZM2G021433	1	48419489	48421030	0	0	0	0	0	not assigned.unknown
GRMZM2G317487	1	48527240	48530179	3.62979	1.7087	2.87207	2.72595	4.04523	not assigned.unknown
GRMZM2G022945	1	48531012	48534628	6.43452	3.48572	6.42816	6.31589	6.44615	not assigned.unknown
GRMZM2G010000	1	48553015	48556046	0.842565	3.25894	3.28247	4.90752	5.69719	stress.abiotic.heat
GRMZM2G013957	1	48657508	48660814	0.93728	0.743594	1.18816	0.716418	0.0892229	not assigned.unknown
GRMZM2G013783	1	48684986	48690042	9.12222	14.2832	9.7691	8.81621	8.52384	lipid metabolism.FA synthesis and FA elongation.acyl coa ligase
GRMZM2G475971	1	48763440	48764344	0	1.10939	0	0.253518	0	not assigned.unknown
AC219108.3_FG001	1	48775963	48776345	0	0	0	0	0	not assigned.unknown
GRMZM2G084389	1	48876693	48878195	2.33574	19.4714	26.2902	26.1287	18.7583	protein.targeting.mitochondria
GRMZM2G383790	1	48889908	48891276	0.295648	0.653755	1.97592	1.49799	2.2223	misc.UDP glucosyl and glucoronyl transferases
GRMZM2G003984	1	48953686	48999879	0.907535	0.303973	0.467604	0.663153	1.26431	protein.degradation.serine protease
GRMZM2G439819	1	49065182	49075664	0.579874	0.794199	0.515138	0.414307	0.345083	RNA.regulation of transcription.putative transcription regulator
GRMZM2G038015	1	49090943	49091860	0.50014	0.974392	2.5148	2.92844	3.33237	not assigned.unknown
GRMZM2G301823	1	49130533	49131302	3.97898	7.59225	8.53266	9.22562	10.0202	PS.calvin cycle
GRMZM2G179155	1	49192806	49195929	10.3825	19.5508	14.6465	15.3175	14.4543	not assigned.unknown
GRMZM2G140432	1	49207906	49216831	12.9395	15.5438	14.3942	15.92	15.9267	not assigned.unknown
GRMZM2G140427	1	49218605	49219526	0	0	0	0	0	not assigned.unknown
GRMZM5G854284	1	49220651	49221495	21.0079	29.3672	32.104	30.0221	32.2465	not assigned.unknown
GRMZM2G440330	1	49223948	49224629	0	0	0	0	0	not assigned.unknown
GRMZM5G807294	1	49278947	49279565	0	0	0	0	0	not assigned.unknown
GRMZM2G030036	1	49287308	49289760	0	0	0	0.544335	1.48694	metal handling.binding, chelation and storage
GRMZM2G124785	1	49320818	49323269	0	0	0	0.734049	2.78081	metal handling.binding, chelation and storage
GRMZM2G092442	1	49392371	49394474	2.63966	0.11817	0.150612	0.157344	0.104615	not assigned.unknown
GRMZM2G043484	1	49406198	49416182	4.10967	2.43334	2.29279	2.45066	2.85575	RNA.regulation of transcription.Polycomb Group (PcG)
GRMZM5G824629	1	49614812	49617825	25.9705	25.4062	19.0649	24.6407	24.2647	protein.degradation.ubiquitin.E2
GRMZM2G056373	1	49620251	49621863	24.6911	18.5083	21.6027	24.7324	22.7605	protein.degradation.serine protease
GRMZM2G011483	1	49650494	49659218	54.3152	30.9357	17.9362	25.5065	42.6244	not assigned.unknown
GRMZM2G121871	1	49722481	49726934	7.37265	7.21495	5.7519	6.61341	7.29643	RNA.processing.RNA helicase
GRMZM2G422295	1	49736191	49736969	1.05464	0.270946	0.234346	1.68151	0.728927	not assigned.unknown
GRMZM2G121957	1	49739213	49741076	0.414948	0	0.137269	0.146956	0	not assigned.unknown
GRMZM2G121960	1	49772907	49794735	4.9383	2.79919	3.13762	3.01265	3.62087	RNA.processing
AC225345.3_FG009	1	49797005	49797959	0	0.109762	0	0.0217461	0	not assigned.unknown
GRMZM2G013853	1	49812676	49813221	3.82993	1.87312	1.94061	1.93711	4.0507	not assigned.unknown
GRMZM2G013639	1	49814503	49819093	16.2185	26.8226	21.5964	18.664	16.5634	not assigned.unknown
GRMZM2G069568	1	49936223	49938978	0	0	0	0	0	not assigned.unknown
GRMZM2G124532	1	50025636	50036980	7.64225	8.97167	6.71041	7.71725	8.80411	signalling.light
GRMZM2G394203	1	50087975	50089098	0	2.46352	10.2653	11.6522	19.4199	not assigned.unknown
GRMZM2G394212	1	50096053	50099240	37.6266	28.1446	30.2724	28.0166	29.3246	misc.oxidases - copper, flavone etc.
GRMZM2G394237	1	50105838	50107404	0.516589	0.427014	0.393954	0.227629	0.387805	not assigned.unknown
GRMZM2G033491	1	50252956	50255269	15.0667	12.1982	11.7026	17.0481	16.696	amino acid metabolism.degradation.aspartate family.lysine
GRMZM2G135968	1	50328666	50340181	11.653	14.2513	14.6125	16.9625	15.3773	not assigned.unknown
GRMZM2G089720	1	50420160	50421666	0.074647	0.442542	0.286041	0.251111	0.144764	not assigned.unknown
GRMZM5G878582	1	50438179	50439466	0.851692	1.06034	1.32872	0.792544	1.21769	not assigned.unknown
GRMZM2G329040	1	50628407	50653355	2.89752	1.6525	1.51376	2.03503	2.67833	not assigned.unknown
GRMZM2G703565	1	50661957	50669948	0.0334834	0.0314161	0.0677341	0.0873592	0.130028	not assigned.unknown
GRMZM2G008490	1	50678626	50682435	7.27526	5.46041	6.08312	7.06375	8.74208	not assigned.unknown
AC208571.4_FG001	1	50700349	50712129	8.24243	4.75455	6.41034	8.01773	8.44518	development.unspecified
GRMZM5G851485	1	50864165	50865478	5.02973	6.61059	5.21652	7.26795	5.98791	not assigned.unknown
GRMZM2G550861	1	51010320	51011073	0	0.0896285	0.083552	0.142188	0	not assigned.unknown
GRMZM2G018941	1	51013924	51015964	108.523	127.424	127.37	132.419	121.314	mitochondrial electron transport / ATP synthesis.NADH-DH.localisation not clear
GRMZM2G317160	1	51016687	51022814	0.597692	0.163506	0.417126	0.292439	0.542678	RNA.regulation of transcription.AP2/EREBP, APETALA2/Ethylene-responsive element binding protein family
GRMZM5G835810	1	51042935	51049357	3.31405	5.23458	4.67636	5.19938	5.36379	RNA.processing
GRMZM5G895991	1	51157162	51161617	12.4588	12.4876	13.3466	13.6784	12.9653	nucleotide metabolism.synthesis.purine.SAICAR lyase
GRMZM2G030794	1	51170075	51171018	1.89188	2.116	1.92687	2.16128	1.88491	not assigned.unknown
GRMZM2G385931	1	51285615	51289996	35.3944	29.536	30.7195	29.8649	33.2254	RNA.processing.RNA helicase
GRMZM2G084783	1	51291270	51292601	7.74773	11.1	10.1973	9.74586	6.96264	protein.assembly and cofactor ligation
GRMZM2G084821	1	51293367	51295043	0.954079	2.25283	3.46687	5.64321	5.21017	not assigned.unknown
GRMZM5G833991	1	51294186	51294944	0.410877	0.247222	0.949373	2.91463e-36	1.25162	not assigned.unknown
GRMZM2G084940	1	51318992	51329214	4.30366	2.88405	2.97119	3.20823	3.6206	major CHO metabolism.degradation.sucrose.invertases.neutral
GRMZM2G070849	1	51397953	51400225	3.56036	19.5267	7.53012	5.83519	5.46653	RNA.regulation of transcription.MYB domain transcription factor family
GRMZM2G165919	1	51534144	51536353	0.168616	0.323686	0.100929	0.381224	0.117823	minor CHO metabolism.raffinose family.galactinol synthases.putative
GRMZM2G476593	1	51751357	51755405	1.71206	1.04653	2.00768	2.43494	2.61425	RNA.processing
GRMZM2G174284	1	51756172	51762147	10.7674	15.8156	14.8181	14.4227	12.1719	RNA.regulation of transcription.bZIP transcription factor family
GRMZM2G318652	1	51894856	51895988	0	0.184889	0.074457	0.0600425	0	not assigned.unknown
GRMZM2G327206	1	51998019	51998877	6.85342	1.67516	0.265232	0.379022	0	not assigned.unknown
GRMZM2G327199	1	52005384	52006238	3.43803	1.35685	0.188118	0.143509	0	not assigned.unknown
GRMZM2G138814	1	52075522	52085564	10.426	8.71022	8.70634	9.74317	8.98795	protein.postranslational modification
GRMZM2G160466	1	52090371	52092668	2.60293	1.21551	3.33705	4.73272	5.81406	not assigned.unknown
GRMZM2G152891	1	52095394	52099196	306.837	181.781	165.687	171.666	156.189	signalling.calcium
GRMZM2G174896	1	52150726	52155845	29.2636	14.9549	6.01858	7.59958	6.59341	protein.postranslational modification
GRMZM2G175019	1	52195050	52195975	0	0.112102	0	0.0318015	0.652622	not assigned.unknown
GRMZM2G175038	1	52196242	52198818	5.56024	10.4031	9.77749	11.3477	9.21179	transport.Major Intrinsic Proteins.SIP
GRMZM2G180889	1	52221089	52222580	1.38328	8.42351	6.98353	5.89798	4.80108	not assigned.unknown
GRMZM2G128644	1	52252487	52253871	0	0.0537905	0.141362	0.260243	0.458479	not assigned.unknown
GRMZM2G314064	1	52346350	52349772	2.51239	11.2933	15.4954	17.9635	14.7986	RNA.regulation of transcription.HB,Homeobox transcription factor family
GRMZM2G009060	1	52394842	52397225	0.419092	2.35205	1.76426	2.37838	2.40657	RNA.regulation of transcription.G2-like transcription factor family, GARP
GRMZM2G309363	1	52455585	52456483	0	0	0	0	0	glycolysis.cytosolic branch.pyruvate kinase (PK)
GRMZM2G009253	1	52457031	52463361	26.1841	15.6748	18.5752	19.6132	23.822	not assigned.unknown
GRMZM2G009690	1	52464439	52467816	1.38817	1.77888	1.419	1.34351	0.903808	misc.UDP glucosyl and glucoronyl transferases
GRMZM2G421779	1	52516455	52521875	0	0	0	0	0	not assigned.unknown
GRMZM2G033519	1	52529799	52541632	0.293542	0.47388	0.448584	0.446631	0.542356	stress.biotic
GRMZM2G033570	1	52564281	52568326	6.63323	44.45	25.6536	25.1861	24.5818	RNA.regulation of transcription.EIN3-like(EIL) transcription factor family
GRMZM2G174680	1	52625969	52627201	0	0	0	0	0	misc.protease inhibitor/seed storage/lipid transfer protein (LTP) family protein
GRMZM2G174696	1	52635446	52643451	25.3847	20.339	24.5766	22.9282	23.3681	protein.targeting.mitochondria
GRMZM5G881180	1	52721488	52721959	0	0.424106	0.168047	0.280164	0.713445	stress.biotic
GRMZM2G144997	1	52761559	52762660	147.62	10.9878	4.42343	2.87226	5.24938	stress.abiotic.heat
GRMZM2G145008	1	52764294	52769331	2.26801	0.237351	0.354692	0.500823	0.865505	RNA.regulation of transcription.unclassified
GRMZM2G145024	1	52771687	52775458	14.6148	26.5718	18.9728	19.5502	21.1276	not assigned.unknown
GRMZM2G145065	1	52779422	52783306	1.43552	1.75674	1.74238	2.09	2.60091	not assigned.unknown
GRMZM2G018678	1	52797848	52807101	0.488563	0.772639	0.940822	1.19057	1.89417	not assigned.unknown
GRMZM2G018728	1	52807626	52810251	55.5041	46.5058	46.0469	53.6489	59.488	protein.postranslational modification
GRMZM2G030272	1	52919937	52921358	8.62964	11.797	6.85902	7.28008	7.88577	RNA.regulation of transcription.WRKY domain transcription factor family
GRMZM2G122740	1	53009546	53015942	0	0	0	0	0	not assigned.unknown
GRMZM2G122734	1	53039847	53041738	0	0	0	0	0	not assigned.unknown
GRMZM2G407825	1	53150787	53155766	2.72297	10.6217	5.87136	3.68983	3.08165	transport.p- and v-ATPases
GRMZM2G107481	1	53158322	53164921	0	2.2647	0.913393	0.783452	0.445713	transport.p- and v-ATPases
GRMZM2G107463	1	53173859	53178656	16.7827	15.4855	13.6923	16.0563	14.7621	protein.degradation.ubiquitin.E3.RING
GRMZM2G102365	1	53270103	53272645	30.4147	6.61083	4.9988	7.1532	6.73013	redox.thioredoxin
GRMZM2G042615	1	53340164	53346116	6.36396	6.24539	6.50351	6.22547	7.84494	RNA.RNA binding
GRMZM2G031001	1	53421631	53423835	5.00769	8.57662	9.13639	12.9053	11.9352	RNA.regulation of transcription.NAC domain transcription factor family
GRMZM2G020940	1	53621182	53623074	889.443	1548.51	1168.15	1203.65	1282.68	not assigned.unknown
GRMZM2G011598	1	53633787	53636032	1.50945	0	0	0.0438561	0.115715	RNA.regulation of transcription.NAC domain transcription factor family
GRMZM5G880803	1	53712514	53712831	0	0	0	0	0	not assigned.unknown
GRMZM2G010149	1	53713608	53715064	5.42912	4.21212	3.87083	4.07011	3.32486	RNA.regulation of transcription.putative transcription regulator
GRMZM2G010657	1	53822732	53830790	13.53	7.4428	7.02052	8.43351	10.7544	cell.organisation
GRMZM2G559436	1	53833928	53842624	12.9532	8.85107	8.61816	10.8488	10.4937	cell.organisation
GRMZM2G110406	1	53843358	53850771	25.0846	16.1571	15.8072	18.914	20.3452	not assigned.unknown
GRMZM2G473036	1	53899044	53899776	0	0	0	0	0	secondary metabolism.phenylpropanoids
GRMZM2G423851	1	53946770	53950477	2.29331	2.6453	3.33171	3.82079	3.02667	hormone metabolism.auxin.induced-regulated-responsive-activated
GRMZM2G124209	1	53993817	54008860	5.68938	8.30631	6.45174	5.67631	5.61812	nucleotide metabolism.degradation
GRMZM2G003424	1	54125015	54129283	45.0965	38.9745	31.7643	38.1218	40.5626	RNA.regulation of transcription.unclassified
GRMZM2G003379	1	54185943	54190298	14.311	8.69322	8.7067	11.5679	12.1834	cell wall.cellulose synthesis
GRMZM2G326335	1	54265664	54267886	0	0	0	0	0	secondary metabolism.phenylpropanoids.lignin biosynthesis.PAL
GRMZM2G023884	1	54268583	54271815	5.11714	8.36227	7.62599	8.07435	7.72437	misc.UDP glucosyl and glucoronyl transferases
GRMZM2G023715	1	54275640	54281143	1.10264	0.620247	2.2413	4.32752	3.49866	signalling.receptor kinases.leucine rich repeat VIII-1
GRMZM2G006404	1	54331305	54334007	0.108357	0.200234	0.0979592	0.324155	0.24049	signalling.calcium
AC204931.3_FG004	1	54339213	54340577	0	0	0	0	0	not assigned.unknown
GRMZM2G006477	1	54343606	54350368	10.524	10.8025	10.0317	10.279	8.14698	RNA.regulation of transcription.G2-like transcription factor family, GARP
GRMZM2G012807	1	54454251	54454899	0	0	0	0	0	not assigned.unknown
AC204931.3_FG002	1	54455937	54456665	0	0	0	0	0	not assigned.unknown
GRMZM2G008501	1	54463587	54469320	4.61279	2.37052	2.97819	3.8558	3.75663	misc.UDP glucosyl and glucoronyl transferases
GRMZM2G050077	1	54533482	54536342	0.422088	0.930406	1.33472	1.81886	1.10062	glycolysis.cytosolic branch.phosphoglycerate mutase
GRMZM2G141094	1	54566582	54572995	0	0	0	0.0215364	0	misc.UDP glucosyl and glucoronyl transferases
GRMZM2G010196	1	54598726	54601782	8.01933	5.81797	3.56323	3.70278	3.46247	not assigned.unknown
GRMZM2G312661	1	54602420	54605364	0.379157	9.65807	4.14035	2.68535	2.94792	signalling.calcium
GRMZM2G106283	1	54728612	54730066	12.711	16.4201	12.7812	13.4726	13.642	not assigned.unknown
GRMZM2G106408	1	54730530	54737067	1.51592	10.6457	6.74384	4.44489	3.80446	misc.cytochrome P450
GRMZM2G317033	1	54820265	54820916	1.1725	1.44536	0.703493	1.42053	0.964116	not assigned.unknown
AC209460.3_FG002	1	54826153	54827321	14.5304	18.0796	13.1666	14.048	15.9869	transport.ABC transporters and multidrug resistance systems
GRMZM2G032936	1	54843017	54851106	14.2197	24.4325	20.507	18.7346	15.993	transport.ABC transporters and multidrug resistance systems
GRMZM2G032912	1	54925278	54927744	0.0400957	0	0.0412034	0.105471	0	RNA.regulation of transcription.Bromodomain proteins
GRMZM2G031825	1	54927759	54932392	30.114	26.7671	27.0256	38.0832	36.1832	amino acid metabolism.degradation.aspartate family.threonine
GRMZM2G017223	1	55067566	55069268	0	0.076645	0	0.0646428	0.11151	misc.acid and other phosphatases
GRMZM2G320325	1	55070837	55075644	8.49583	14.7881	14.254	12.0023	9.31515	protein.assembly and cofactor ligation
GRMZM2G016480	1	55080200	55086489	21.1239	13.9161	24.2346	24.6067	22.6745	signalling.receptor kinases.leucine rich repeat III
GRMZM2G019991	1	55146391	55151071	9.6324	6.47711	7.17672	8.21646	7.79009	not assigned.unknown
GRMZM2G369884	1	55163393	55164226	0	0	0	0	0	not assigned.unknown
AC211001.3_FG002	1	55170919	55171375	0	0	0	0	0	not assigned.unknown
GRMZM2G109121	1	55288851	55297235	47.1583	49.1132	47.4316	49.5041	55.0115	RNA.transcription
GRMZM2G399320	1	55378368	55386299	32.7255	23.0378	26.2199	28.0081	36.7862	not assigned.unknown
GRMZM2G100288	1	55388284	55391652	19.3522	19.7153	18.595	20.8291	25.6254	signalling.receptor kinases.Catharanthus roseus-like RLK1
GRMZM2G056462	1	55442661	55452658	54.5939	31.8154	39.4724	39.8685	44.4409	protein.synthesis.initiation
GRMZM2G056424	1	55454557	55455428	0.315588	3.33215	1.19542	0.40004	0.2025	PS.lightreaction.photosystem II.PSII polypeptide subunits
GRMZM2G056355	1	55455943	55457347	5.56709	15.8877	20.029	18.5121	18.1107	protein.postranslational modification
GRMZM2G075262	1	55501248	55504868	0.637022	5.26099	2.67199	2.27941	2.90215	not assigned.unknown
GRMZM2G075245	1	55505244	55505976	2.2242	3.07825	0.739269	1.02554	1.04907	not assigned.unknown
GRMZM2G072892	1	55570306	55575442	19.136	10.4559	9.04665	9.9738	9.79466	not assigned.unknown
GRMZM2G043456	1	55738075	55741547	14.4582	14.3986	16.1499	14.7432	15.1509	RNA.transcription
GRMZM2G028132	1	55752463	55761122	7.73733	7.49987	6.51749	6.66789	9.42158	RNA.transcription
GRMZM2G703575	1	55816120	55816806	0	0	0	0	0	not assigned.unknown
GRMZM2G049211	1	56020500	56032735	8.7681	14.3212	11.6669	13.0781	14.7669	protein.targeting.secretory pathway.vacuole
GRMZM2G136270	1	56038257	56038733	12.1769	24.0915	22.4365	20.4828	18.6758	not assigned.unknown
GRMZM2G119850	1	56073142	56077145	14.3069	14.813	23.1885	32.8269	38.1375	signalling.receptor kinases.leucine rich repeat XI
GRMZM2G353195	1	56158435	56160570	0.680284	0.88952	0.642172	1.91373	2.01764	not assigned.unknown
GRMZM2G054916	1	56160676	56162858	0.052517	0	0.0485939	0.115719	0.101088	development.storage proteins
GRMZM2G062391	1	56215992	56221441	9.35844	5.66431	4.96474	5.86003	6.78736	RNA.regulation of transcription.bZIP transcription factor family
GRMZM2G062425	1	56223519	56226018	57.7259	60.1087	62.6084	76.4429	67.978	not assigned.unknown
GRMZM2G063657	1	56283125	56290244	9.54314	31.3548	13.9974	13.2368	13.9649	RNA.processing
GRMZM2G075988	1	56306535	56307813	0.289619	1.01672	0.404411	0.225095	0.167214	not assigned.unknown
GRMZM2G076056	1	56311864	56313512	0	0	0	0	0	not assigned.unknown
GRMZM2G315279	1	56315984	56316889	0	0	0	0	0	not assigned.unknown
GRMZM2G413154	1	56351953	56352392	0	0	0	0	0	not assigned.unknown
GRMZM2G173387	1	56439498	56446199	28.8798	8.40985	16.8591	21.1461	14.7346	transport.potassium
GRMZM2G044074	1	56558220	56562800	2.83585	3.9811	3.38091	3.76358	3.07124	tetrapyrrole synthesis.uroporphyrinogen decarboxylase
GRMZM2G044038	1	56564394	56567128	3.69508	6.21245	6.70154	9.35566	10.7424	protein.postranslational modification
GRMZM2G043948	1	56569007	56573612	8.61724	6.16277	6.53985	6.58048	7.20372	protein.aa activation
GRMZM2G043493	1	56575209	56577035	70.3692	0.745817	3.15677	1.63563	0.755739	not assigned.unknown
GRMZM2G030571	1	56674096	56676982	8.47271	0.424501	0.129851	0.0151828	0	amino acid metabolism.synthesis.central amino acid metabolism.alanine.alanine-glyoxylate aminotransferase
GRMZM2G010823	1	56746483	56752553	21.0037	26.9623	21.3974	20.8221	18.8628	TCA / org. transformation.TCA.fumarase
GRMZM2G011025	1	56753110	56755002	0	0	0	0	0	redox.ascorbate and glutathione.glutathione
GRMZM2G311182	1	56756359	56761192	1.93602	1.86154	0.800396	1.18485	1.13597	major CHO metabolism.degradation.sucrose.Susy
AC204306.3_FG007	1	56756490	56756985	0	0	0.183771	0.0186321	0	not assigned.unknown
GRMZM2G011240	1	56761362	56764462	2.41747	1.97904	0.56493	1.00905	0.143516	major CHO metabolism.degradation.sucrose.Susy
GRMZM2G013299	1	56781489	56782882	0	0	0	0.0994684	0.340206	redox.ascorbate and glutathione.glutathione
GRMZM2G318767	1	56784100	56785004	0	0	0	0	0	not assigned.unknown
GRMZM2G318780	1	56785050	56792250	3.95055	5.5243	1.93672	2.62674	2.59236	major CHO metabolism.degradation.sucrose.Susy
AC215638.3_FG007	1	56884764	56890206	0	0	0.076238	0.0633	0	not assigned.unknown
GRMZM2G069618	1	56892741	56895106	7.14924	11.2132	9.16971	9.81398	10.615	not assigned.unknown
GRMZM2G353147	1	56944971	56983764	6.30463	3.12223	3.27021	3.27609	3.36549	signalling.calcium
GRMZM2G013588	1	57096642	57102772	3.10262	1.51387	2.89553	3.14152	4.05276	not assigned.unknown
GRMZM2G107597	1	57246485	57249614	0	0.081224	0.0886897	0.046418	0	development.unspecified
GRMZM2G015226	1	57278320	57279368	0	0	0	0	0	not assigned.unknown
GRMZM2G073969	1	57288051	57288781	0	0	0	0	0	not assigned.unknown
GRMZM2G073755	1	57296567	57299288	51.9078	27.9509	31.8628	41.156	38.6326	development.unspecified
AC206840.3_FG002	1	57349175	57349496	36.8504	43.6267	51.1552	39.7067	34.4903	not assigned.unknown
GRMZM5G838433	1	57355273	57356321	0	0	0	0	0	not assigned.unknown
GRMZM2G158676	1	57458589	57463611	21.1332	22.4697	25.3756	19.8595	21.6333	RNA.processing.splicing
GRMZM2G158662	1	57479255	57483149	21.1311	27.9969	26.4053	22.635	19.2336	signalling.light
GRMZM2G018229	1	57553334	57559348	35.499	27.1341	32.3115	24.4573	25.2824	protein.synthesis.misc ribosomal protein.BRIX
GRMZM2G322917	1	57561577	57562334	4.11247	1.13183	1.55056	1.67626	1.74941	not assigned.unknown
GRMZM2G019027	1	57567260	57568293	0	0	0	0	0	secondary metabolism.N misc.alkaloid-like
AC214145.2_FG002	1	57636074	57639460	0	0	0	0	0	not assigned.unknown
GRMZM5G828060	1	57667344	57668373	0	0	0	0	0	secondary metabolism.N misc.alkaloid-like
GRMZM2G552469	1	57680977	57682246	0.0922815	0	0	0	0	not assigned.unknown
GRMZM2G417219	1	57684961	57688874	0	0	0	0	0	not assigned.unknown
GRMZM2G439988	1	57741798	57743531	0	0	0	0	0	secondary metabolism.N misc.alkaloid-like
GRMZM2G421429	1	57832915	57833953	0	0	0	0	0	secondary metabolism.N misc.alkaloid-like
GRMZM5G849959	1	57835788	57840955	9.67681	11.1374	11.5556	12.2148	12.0616	protein.degradation.cysteine protease
GRMZM2G064814	1	57891911	57892792	0	0.156601	0	0	0	not assigned.unknown
GRMZM2G042074	1	58048570	58059807	38.2313	55.7602	42.466	41.2933	44.075	protein.degradation.AAA type
GRMZM2G030072	1	58294902	58304059	17.1848	15.6775	17.0635	17.9836	15.4714	protein.degradation.serine protease
GRMZM2G133978	1	58362271	58363015	0.556195	0.332683	0.742475	1.09827	1.36478	signalling.misc
GRMZM2G133986	1	58363476	58368308	11.6038	8.2042	11.4206	13.0875	16.0552	cell.cycle
GRMZM2G134109	1	58368523	58370825	347.136	295.592	321.024	252.546	230.342	protein.synthesis.ribosomal protein.eukaryotic.40S subunit.S21
GRMZM2G075290	1	58418769	58420264	0	0	0	0	0	stress.abiotic.drought/salt
GRMZM2G075502	1	58472622	58474707	0.218247	3.08112	3.3643	2.601	2.36115	metal handling.binding, chelation and storage
GRMZM2G155680	1	58577164	58580062	0	0	0	0	0	amino acid metabolism.degradation.aspartate family.lysine
AC209438.4_FG002	1	58610124	58610701	0	0	0	0	0	not assigned.unknown
GRMZM5G893926	1	58646279	58647579	0	0	0	0	0	not assigned.unknown
GRMZM2G177532	1	58706535	58720916	3.86349	4.12866	2.66997	3.02926	3.33744	transport.metal
GRMZM2G097843	1	58736569	58741621	2.2683	2.66493	2.33406	2.74514	2.80037	not assigned.unknown
GRMZM2G083689	1	59061225	59087208	66.3597	41.907	41.8852	55.9948	66.8942	protein.synthesis.initiation
GRMZM2G552278	1	59128577	59132762	1.47997	1.27931	1.2027	1.62899	1.54452	not assigned.unknown
AC205888.4_FG004	1	59137859	59141285	0.235273	0.0942854	0.128177	0.0917402	0.136498	not assigned.unknown
GRMZM2G117228	1	59145694	59148624	1.08123	1.15151	0.952694	1.06171	1.60365	not assigned.unknown
GRMZM2G133322	1	59180801	59184089	0	0	0	0	0	development.unspecified
GRMZM2G400352	1	59305238	59370055	0	0	0	0	0	development.storage proteins
GRMZM5G896731	1	59462360	59467763	6.12629	4.60313	5.3649	5.69297	6.21953	protein.synthesis.misc ribosomal protein
AC205502.4_FG004	1	59467406	59469906	0.0328632	1.88756e-253	0.143419	0.0971394	7.66019e-70	secondary metabolism.isoprenoids.terpenoids
GRMZM5G882821	1	59505500	59508805	0.334298	0.564967	1.58864	1.24742	0.857101	lipid metabolism.lipid degradation.lipases
GRMZM2G052034	1	59576754	59579916	0.791566	0.717515	0.797435	1.50076	2.09812	protein.degradation.ubiquitin.E3.RING
GRMZM2G052148	1	59581459	59591624	32.4317	17.4059	21.5341	28.3738	34.2107	protein.targeting.nucleus
GRMZM2G052206	1	59592612	59598623	5.53888	19.4693	8.9629	9.99423	9.97038	protein.postranslational modification
GRMZM2G124576	1	59670858	59675001	70.6866	73.4373	82.5954	83.8388	104.193	RNA.regulation of transcription.putative transcription regulator
GRMZM2G425079	1	59675915	59723537	0	0	0	0	0	not assigned.unknown
GRMZM2G356155	1	59728826	59731407	0	0	0	0	0	not assigned.unknown
GRMZM2G134671	1	59764837	59769739	2.93612	8.16378	9.21965	9.07557	10.3946	RNA.regulation of transcription.C2C2(Zn) CO-like, Constans-like zinc finger family
GRMZM2G063048	1	59863426	59864863	0.908899	0.59404	0.588359	0.526683	1.03521	tetrapyrrole synthesis.divinyl chlorophyllide-a 8-vinyl-reductase
GRMZM5G801330	1	59865347	59865530	0.576735	0	0.296836	0	0	not assigned.unknown
GRMZM2G038598	1	59956282	59961191	13.1925	20.5679	10.5784	7.76529	6.08692	cell wall.precursor synthesis.UGE
GRMZM2G392172	1	60006074	60013318	0.0110044	0	0.0079862	0.00345013	0.0382498	DNA.repair
GRMZM2G392177	1	60007974	60008283	0	0	0	0	0	not assigned.unknown
GRMZM2G347708	1	60022739	60024593	0.084501	0	0	0	0	major CHO metabolism.degradation.starch.starch cleavage
GRMZM2G088166	1	60034564	60035120	0	0	0	0	0	not assigned.unknown
GRMZM2G082034	1	60087922	60089930	73.5725	29.8717	5.16189	8.83713	5.78552	major CHO metabolism.degradation.starch.starch cleavage
GRMZM2G378907	1	60092677	60101657	10.7335	19.9877	13.5675	11.3112	8.91057	protein.degradation.ubiquitin.E3.SCF.FBOX
GRMZM2G169890	1	60145099	60148692	89.6053	403.45	141.064	71.2356	37.6403	redox.dismutases and catalases
GRMZM2G467072	1	60153708	60154450	6.17095	1.14862	0.101417	0.17076	0	not assigned.unknown
GRMZM2G000923	1	60163113	60165406	167.291	192.894	242.486	214.101	226.649	protein.synthesis.elongation
GRMZM2G144995	1	60216119	60219476	109.4	94.6111	107.187	111.58	122.481	RNA.regulation of transcription.putative transcription regulator
GRMZM2G445791	1	60220160	60227112	0	0	0	0	0	lipid metabolism.lipid degradation.beta-oxidation.acyl CoA DH
GRMZM2G144868	1	60261031	60265747	25.6476	25.7454	29.1536	28.4302	33.0995	signalling.G-proteins
GRMZM2G469162	1	60395571	60406353	9.57655	13.4549	10.7319	12.2353	12.7709	RNA.regulation of transcription.Chromatin Remodeling Factors
AC195378.3_FG001	1	60523639	60524197	0	0	0	0	0	not assigned.unknown
GRMZM2G566688	1	60594124	60598830	0	0	0	0	0	not assigned.unknown
GRMZM2G009232	1	60675951	60678513	0.453795	0.262624	0.141217	0.0398315	0	misc.cytochrome P450
GRMZM2G308666	1	60699958	60702159	0.471168	0.252611	0.0618824	0.0453864	0	misc.misc2
GRMZM2G091648	1	60754509	60755924	1.47013	0	0.0657925	0.112991	0	not assigned.unknown
GRMZM2G090733	1	60805905	60809340	1.93969	0.98847	1.3278	1.27004	2.56747	misc.short chain dehydrogenase/reductase (SDR)
GRMZM2G090788	1	60809335	60830586	2.59838	3.52749	3.16622	3.88881	3.52807	not assigned.unknown
GRMZM2G402584	1	60831510	60835569	3.55228	2.03686	4.754	5.80271	6.58442	misc.oxidases - copper, flavone etc.
GRMZM2G101689	1	60861637	60865926	18.2756	12.4902	14.7914	15.47	13.8183	RNA.processing
GRMZM2G101744	1	60867081	60870260	2.5488	3.20962	3.31919	4.14855	3.29999	not assigned.unknown
GRMZM2G167698	1	60966701	60970186	0	0	0	0	0	misc.cytochrome P450
GRMZM2G038153	1	61012518	61018961	0	0.0377136	0.0114216	0	0	secondary metabolism.isoprenoids.terpenoids
GRMZM5G885628	1	61019343	61022157	25.022	21.9459	20.2206	22.6681	22.7104	cell.vesicle transport
GRMZM5G842103	1	61029463	61032048	0.0162589	0	0.0452914	0.0501023	0.0314625	not assigned.unknown
GRMZM2G102497	1	61136279	61139967	0.929827	11.7215	9.63215	8.88087	7.20912	not assigned.unknown
GRMZM2G102548	1	61142712	61147864	10.9596	8.34962	11.3107	11.3634	11.0717	misc.O-methyl transferases
GRMZM2G086788	1	61291637	61295169	11.9981	14.1743	13.2277	14.623	14.1008	protein.synthesis.ribosomal protein.prokaryotic.chloroplast.50S subunit.L6
GRMZM2G362281	1	61447679	61449659	1.12015	1.03119	0.755351	1.01882	0.701563	redox.glutaredoxins
GRMZM2G061624	1	61451314	61455017	63.486	32.1108	49.5869	58.9232	49.7888	development.unspecified
GRMZM5G841053	1	61528843	61529128	2.02336	4.59804	3.97838	3.4929	4.56472	not assigned.unknown
AC204530.4_FG002	1	61612999	61620826	15.5229	10.2584	15.5381	19.1834	21.328	not assigned.unknown
AC204530.4_FG003	1	61621306	61622780	0.371016	0.204726	0.2129	0.167217	0	cell.organisation
GRMZM5G898740	1	61623551	61631442	9.97801	5.28636	5.51935	5.85698	5.33217	not assigned.unknown
AC204530.4_FG006	1	61666244	61668447	3.66825	2.65136	2.32946	2.14297	1.68385	signalling.phosphinositides.phosphatidylinositol-4-phosphate 5-kinase
GRMZM5G831486	1	61669004	61670375	8.08717	5.8212	5.25328	4.2401	3.4529	signalling.phosphinositides.phosphatidylinositol-4-phosphate 5-kinase
GRMZM2G116010	1	61694207	61697470	1.28727	0.586827	0.854143	1.04219	1.28748	signalling.phosphinositides.phosphatidylinositol-4-phosphate 5-kinase
GRMZM2G115975	1	61698113	61711005	19.3325	12.3149	14.4774	16.6673	17.5378	signalling.unspecified
GRMZM2G115921	1	61714308	61719903	5.43745	9.57505	4.90413	5.4141	4.84816	RNA.regulation of transcription.unclassified
GRMZM2G081322	1	61930849	61941338	0.27971	0.094865	0.0890728	0.152012	0.172011	cell.organisation
GRMZM2G082346	1	61943739	61946316	3.389	3.00165	2.78559	3.47321	4.4368	protein.degradation.ubiquitin.E3.SCF.FBOX
GRMZM2G703582	1	61947966	61949704	0.858068	1.60225	1.97352	2.12431	2.2211	hormone metabolism.ethylene.synthesis-degradation
GRMZM2G421970	1	62003387	62003933	0	0	0	0	0	not assigned.unknown
GRMZM5G864300	1	62003579	62003913	0	0	0	0	0	not assigned.unknown
GRMZM5G861985	1	62059715	62059985	0	0	0	0	0	not assigned.unknown
GRMZM2G382569	1	62140921	62142883	1.68412	12.3791	13.1992	15.1948	10.1587	hormone metabolism.ethylene.synthesis-degradation
GRMZM2G063055	1	62225860	62227001	0	0	0	0	0	not assigned.unknown
GRMZM2G156827	1	62234386	62243455	4.47626	3.00622	2.97687	3.01338	4.20119	RNA.regulation of transcription.PWWP domain protein
AC204659.3_FG005	1	62239789	62241042	0	0	0	0	0	RNA.processing.splicing
GRMZM2G057652	1	62328744	62332885	2.70422	1.00277	1.19209	2.19368	1.36676	protein.degradation.serine protease
GRMZM2G057674	1	62333453	62344679	11.8856	11.2316	9.89821	11.5572	11.2385	cell.organisation
GRMZM2G703586	1	62420870	62422327	0	0	0	0	0	amino acid metabolism.synthesis.branched chain group.common
GRMZM5G811034	1	62426216	62426592	21.868	3.81868	12.45	20.2994	16.9361	cell.division
GRMZM2G108416	1	62431551	62451529	10.1119	16.5262	12.3508	12.4129	12.058	misc.aminotransferases.aminotransferase class IV family protein
GRMZM2G414278	1	62454520	62457547	0	0	0	0	0	lipid metabolism.lipid degradation.lipases.triacylglycerol lipase
GRMZM2G108523	1	62489648	62490413	0	0	0	0	0	not assigned.unknown
GRMZM2G108530	1	62492400	62497282	1.8135	0.827594	0.620148	0.904457	0.412463	not assigned.unknown
GRMZM2G108576	1	62499801	62501349	0	0	0	0	0	misc.UDP glucosyl and glucoronyl transferases
GRMZM5G871471	1	62523037	62529696	0.352204	0	0.0216886	0	0	amino acid metabolism.degradation.serine-glycine-cysteine group.glycine
GRMZM2G577677	1	62530193	62532719	77.3136	82.9855	83.0085	111.823	97.7386	RNA.regulation of transcription.putative transcription regulator
GRMZM5G822100	1	62557970	62560480	0	0	0	0	0.106751	misc.cytochrome P450
GRMZM2G168665	1	62675224	62676476	0	0	0	0.085952	0	RNA.regulation of transcription.unclassified
GRMZM2G140915	1	62699570	62701779	0	0	0.0416132	0.0133201	0	misc.cytochrome P450
GRMZM2G140968	1	62701946	62702991	0	0	0	0	0	not assigned.unknown
GRMZM2G442387	1	62708547	62714333	0	0.166093	0.0349248	0.0347779	0.0478023	not assigned.unknown
GRMZM2G140989	1	62715935	62718902	0	0.0210363	0.031878	0.015896	0	misc.acid and other phosphatases
AC213099.3_FG002	1	62887598	62890415	10.572	6.74544	6.92274	8.8491	9.81897	not assigned.unknown
AC213099.3_FG001	1	62918112	62919260	11.8092	10.3332	14.1754	14.3504	17.7959	not assigned.unknown
GRMZM5G862071	1	62924729	62925091	3.5265	3.65866	4.97087	4.14876	5.17209	not assigned.unknown
GRMZM2G109271	1	62978406	63002633	0.555856	0.440074	0.352301	0.403355	0.478006	TCA / org. transformation.TCA.succinate dehydrogenase
GRMZM2G109221	1	63008169	63032470	2.46969	0.686039	1.54313	2.29522	1.98306	transport.sugars
GRMZM2G109201	1	63033910	63037953	0.384387	0.70818	0.697443	0.813949	0.394806	transport.sugars
AC226368.2_FG006	1	63039645	63041286	5.67715	7.40212	8.65243	6.63992	6.79711	not assigned.unknown
GRMZM2G109126	1	63090442	63091267	2.17625	3.25418	1.9949	3.47603	2.77871	not assigned.unknown
GRMZM2G046297	1	63098165	63100360	0.055805	0	0.0315045	0.0218197	0.1088	protein.postranslational modification.kinase.receptor like cytoplasmatic kinase VII
GRMZM5G801004	1	63103504	63108343	0	0	0	0	0	not assigned.unknown
GRMZM2G043346	1	63150762	63157178	11.4108	6.30631	8.83758	11.7136	12.4936	cell.organisation
GRMZM2G342042	1	63159466	63165274	0	0	0	0	0	protein.postranslational modification
GRMZM2G073401	1	63208082	63211177	50.1835	34.3417	43.5149	40.9385	34.7156	protein.postranslational modification
GRMZM2G040954	1	63353286	63361555	9.59709	6.14034	6.43178	8.50685	10.3636	protein.postranslational modification
GRMZM2G703595	1	63444817	63445078	0	0	0	0	0	not assigned.unknown
GRMZM5G808350	1	63498185	63501325	2.02115	2.35684	2.07911	2.50866	2.64754	not assigned.unknown
AC216247.3_FG001	1	63536148	63538628	1.5055	0.085169	0.242543	0	0.173009	stress.abiotic.heat
GRMZM2G703598	1	63540493	63541381	0.075534	0.142442	0.327588	0.176424	0.146318	not assigned.unknown
AC216247.3_FG004	1	63557915	63558179	0.521755	2.92177	1.12213	2.06934	1.01628	not assigned.unknown
AC216247.3_FG005	1	63573931	63578006	8.83886	6.17886	4.80956	4.14918	3.54406	cell.cycle.peptidylprolyl isomerase
AC208576.3_FG001	1	63590506	63591874	0.0421711	0	0	0	0	not assigned.unknown
GRMZM2G040453	1	63609650	63611181	9.30448	5.35949	4.56747	3.88559	3.27033	cell.cycle.peptidylprolyl isomerase
GRMZM2G040515	1	63611561	63614575	8.50103	20.2381	15.2206	14.9892	10.9938	protein.degradation
GRMZM2G040638	1	63645309	63646802	0	0	0.0383894	0.59303	0.462231	misc.peroxidases
GRMZM2G004984	1	63676344	63677920	0	0	0	0	0	misc.peroxidases
GRMZM2G305640	1	63682736	63684856	0	0	0	0	0	not assigned.unknown
GRMZM2G168073	1	63743877	63744855	0	0	0	0	0	misc.peroxidases
GRMZM2G024234	1	63847133	63848292	0	0	0	0	0	misc.peroxidases
GRMZM2G330650	1	63891259	63897736	12.3252	9.69133	11.1082	12.0064	11.7513	cell.vesicle transport
AC197387.3_FG004	1	63919533	63919998	1.68639	3.00717	1.28362	2.35476	1.75867	not assigned.unknown
GRMZM2G107196	1	64004687	64010386	7.90922	7.22947	7.61844	8.14791	7.65516	signalling.in sugar and nutrient physiology.pyruvate dehydrogenase kinase
GRMZM2G326248	1	64012255	64014810	0.755381	1.32079	2.05787	2.05366	2.22756	not assigned.unknown
GRMZM2G026417	1	64015284	64016906	10.2058	5.9398	6.7229	6.66143	7.32518	RNA.regulation of transcription.GeBP like
GRMZM2G026322	1	64018157	64020789	0	0	0.0413394	0.0177413	0.0933773	misc.cytochrome P450
GRMZM2G459563	1	64079847	64082498	0	0	0	0.0171849	0	misc.cytochrome P450
GRMZM2G084407	1	64148064	64150545	0	0	0	0	0	misc.cytochrome P450
GRMZM2G147698	1	64237899	64239729	0	0	0	0.0157492	0	RNA.regulation of transcription.MYB domain transcription factor family
GRMZM2G092888	1	64389860	64397770	5.40853	6.10405	5.75942	6.41801	7.69539	protein.postranslational modification
GRMZM2G703602	1	64431851	64432561	0	0	0	0	0	not assigned.unknown
GRMZM2G703604	1	64482512	64483185	0	0	0	0	0	not assigned.unknown
GRMZM2G063561	1	64538884	64539643	0	0	0	0	0	not assigned.unknown
GRMZM2G063498	1	64540770	64544864	0.125478	0.013852	0	0	0	not assigned.unknown
GRMZM2G015902	1	64598031	64603232	19.0326	14.2167	16.4361	15.2308	15.2907	not assigned.unknown
GRMZM2G016281	1	64603681	64605669	0.0977335	0	0	0.0319606	0	stress.abiotic.heat
GRMZM2G301297	1	64648549	64650511	1.18239	0.207487	0.58226	0.703807	0.179396	not assigned.unknown
GRMZM2G301294	1	64661049	64662922	0.120916	0.117732	0.114472	0.107891	0.114334	not assigned.unknown
GRMZM2G001361	1	64672345	64674038	0.10604	0.257679	0.16567	0.14175	0.0970715	cell wall.cellulose synthesis.cellulose synthase
GRMZM2G001288	1	64710880	64720688	0.35942	1.51657	0.634179	0.614882	0.449004	misc.beta 1,3 glucan hydrolases
GRMZM2G301271	1	64719328	64722844	3.0162e-21	9.9265e-39	9.4139e-15	1.42616e-44	4.30974e-130	transport.amino acids
GRMZM2G306945	1	64875249	64878499	0	0	0	0	0	TCA / org. transformation.TCA.succinate dehydrogenase
GRMZM2G306919	1	64885892	64889912	0	0	0	0	0	transport.amino acids
GRMZM2G127138	1	64964612	64967070	0	0	0	0	0	transport.amino acids
GRMZM2G127150	1	64969309	64971490	0.118971	4.31962	1.8388	0.684407	0.787634	transport.amino acids
GRMZM2G127181	1	64975092	64978431	0	0	0	0	0	protein.postranslational modification
AC191317.3_FG009	1	64984097	64984628	0	0	0	0	0	not assigned.unknown
GRMZM2G075153	1	65036540	65040245	23.962	44.6629	43.1662	43.8139	45.4193	amino acid metabolism.synthesis.aspartate family.methionine.cystathionine gamma-synthase
GRMZM2G042683	1	65086181	65088111	32.68	32.4977	40.3647	32.9754	28.0751	RNA.RNA binding
GRMZM2G042662	1	65092990	65093640	0	0	0	0	0	not assigned.unknown
GRMZM5G846185	1	65097662	65100413	0	0	0	0	0	misc.UDP glucosyl and glucoronyl transferases
GRMZM2G042641	1	65097792	65098167	0	0	0	0	0	misc.UDP glucosyl and glucoronyl transferases
GRMZM5G835599	1	65113347	65113534	0	0	0	0	0	not assigned.unknown
GRMZM2G084540	1	65220871	65226077	52.4282	30.5219	35.007	44.3291	53.8034	RNA.RNA binding
GRMZM5G883601	1	65341335	65347135	26.514	23.6201	20.1096	21.1504	19.6847	RNA.processing
GRMZM2G049762	1	65348515	65349797	0	0	0	0	0	not assigned.unknown
GRMZM2G056944	1	65351759	65353904	5.92938	18.9763	17.4396	19.0178	14.9908	nucleotide metabolism.degradation
GRMZM5G815369	1	65417376	65435984	6.20492	3.43932	7.57637	6.56395	5.54574	stress.biotic
GRMZM2G434380	1	65481680	65482085	0.847645	1.03343	0.774865	0.756868	0.391194	not assigned.unknown
GRMZM2G121996	1	65484699	65488831	7.03669	7.83528	6.69121	7.18975	8.12672	stress.abiotic.drought/salt
GRMZM2G121990	1	65490013	65490687	0	0	0	0	0	not assigned.unknown
GRMZM2G012355	1	65586323	65587214	0	0	0.104523	0	0	stress.abiotic.drought/salt
GRMZM2G311822	1	65586593	65589570	0	0	0	0	0	stress.abiotic.drought/salt
GRMZM2G115025	1	65590457	65591196	0	0	0	0	0	not assigned.unknown
GRMZM2G097426	1	65618359	65621437	1.82826	1.47293	1.20776	1.48402	1.30322	cell.organisation
AC187800.4_FG003	1	65642558	65642846	0	0	0	0	0	not assigned.unknown
GRMZM2G350312	1	65657062	65660290	6.82516	13.1795	25.4263	18.2809	8.30019	RNA.regulation of transcription.bHLH,Basic Helix-Loop-Helix family
GRMZM2G051836	1	65679751	65682088	1.10912	1.81599	2.43776	2.40888	2.30213	protein.synthesis.ribosomal protein.eukaryotic.40S subunit.S9
GRMZM2G100452	1	65729352	65730886	0.353487	0.341822	0.0396496	0.0512105	0	minor CHO metabolism.others
GRMZM2G100497	1	65731125	65741938	7.72931	9.19239	8.75768	9.63248	.	protein.aa activation.pseudouridylate synthase
GRMZM2G353718	1	65745454	65746441	6.70386	3.46939	5.81149	7.82103	7.82452	cell.organisation
GRMZM5G896901	1	65763956	65765479	0	0	0	0	0	stress.biotic
GRMZM2G004298	1	65994544	65996015	0	0	0	0	0	stress.abiotic.unspecified
GRMZM2G078806	1	66012876	66017039	0.596721	10.8688	3.61216	3.00005	2.08292	development.unspecified
GRMZM2G078876	1	66023612	66026784	18.2867	24.3309	17.6662	14.8781	15.5156	not assigned.unknown
GRMZM5G812891	1	66100095	66102132	0	0	0	0	0	not assigned.unknown
AC204540.3_FG001	1	66117382	66117853	0	0	0	0	0	not assigned.unknown
GRMZM2G143086	1	66170087	66176277	15.3645	15.7929	16.9683	17.8965	19.9356	not assigned.unknown
GRMZM2G038811	1	66246532	66247286	0	0	0	0	0	not assigned.unknown
GRMZM2G311036	1	66304871	66306978	0.741904	87.163	21.6766	16.05	21.5749	secondary metabolism.phenylpropanoids
GRMZM2G336824	1	66387643	66390084	0.196987	21.8429	3.32355	1.6584	2.2358	secondary metabolism.phenylpropanoids
AC207549.3_FG010	1	66421314	66422193	0	0	0	0	0	not assigned.unknown
GRMZM2G023325	1	66500691	66501706	0	0	0.0456412	0	0	secondary metabolism.phenylpropanoids
GRMZM2G101745	1	66514376	66515231	0.243196	0.589131	0.526624	0.306327	0	not assigned.unknown
GRMZM2G113139	1	66575917	66581093	17.9141	18.0258	19.4349	16.425	16.5909	RNA.regulation of transcription.putative transcription regulator
GRMZM2G003138	1	66670981	66672944	0.0482998	0.27895	0.0339067	0.184411	0.332092	lipid metabolism.FA synthesis and FA elongation.beta ketoacyl CoA synthase
GRMZM5G803802	1	66755074	66755914	0.619505	1.70378	1.77738	1.33526	1.52203	not assigned.unknown
GRMZM2G017670	1	66769929	66771193	0	0.303102	0.148523	0.234051	0.0919882	not assigned.unknown
AC190740.2_FG004	1	66781534	66787044	0	0	0	0	0	RNA.processing.RNA helicase
GRMZM2G011667	1	66794365	66799263	0.158966	0.438619	0.604145	0.266352	0.0912064	not assigned.unknown
GRMZM2G152925	1	66948064	66952666	70.6455	66.3721	74.8501	66.2445	54.4073	mitochondrial electron transport / ATP synthesis.cytochrome c oxidase
GRMZM2G152877	1	66955644	66961361	10.746	10.1645	7.74009	9.68624	9.82342	not assigned.unknown
GRMZM2G396212	1	66973531	66976092	0	0	0	0	0	amino acid metabolism.synthesis.aromatic aa.chorismate.3-deoxy-D-arabino-heptulosonate 7-phosphate synthase
GRMZM5G894031	1	67048785	67049232	0	0	0	0	0	misc.cytochrome P450
GRMZM2G120069	1	67055551	67057472	0	0	0	0.0224223	0	protein.degradation
GRMZM2G120079	1	67077442	67079260	0.0595095	0	0.0346959	0.338822	1.38814	protein.degradation
GRMZM2G125314	1	67128995	67130903	0.118513	0	0.159239	0.367102	2.0184	protein.degradation
GRMZM2G426511	1	67140000	67142225	6.34497	0.235046	0.537151	0.23456	0.256344	not assigned.unknown
GRMZM2G370519	1	67145033	67146044	0	0	0	0	0	misc.cytochrome P450
GRMZM2G370510	1	67179667	67182158	0	13.796	8.29607	4.98705	4.20522	misc.misc2
AC199198.3_FG003	1	67186672	67187026	0	0.198795	0	0.056942	0	not assigned.unknown
AC199198.3_FG002	1	67196530	67196884	0	0	0	0	0	not assigned.unknown
GRMZM2G104353	1	67248422	67252880	43.4335	30.7713	42.9939	51.2135	53.7804	RNA.RNA binding
GRMZM2G703625	1	67360613	67360979	0	0	0	0	0	not assigned.unknown
GRMZM2G107499	1	67406854	67413447	21.7026	22.13	20.7218	20.4509	22.1842	not assigned.unknown
GRMZM2G107495	1	67431405	67433514	5.16419	2.132	3.99442	7.05575	6.30757	not assigned.unknown
GRMZM2G107473	1	67436203	67440532	43.4377	51.5129	48.1399	52.9899	52.6074	not assigned.unknown
GRMZM2G410479	1	67523714	67533727	17.2323	12.0892	15.1386	16.9023	18.9431	RNA.processing.splicing
GRMZM2G051879	1	67644785	67647420	600.939	259.849	273.066	309.619	302.208	DNA.synthesis/chromatin structure.histone
GRMZM2G056151	1	67648528	67649680	0	0	0	0	0	protein.degradation.ubiquitin.E3.RING
GRMZM2G090018	1	67725751	67728371	1.08542	0.599376	1.31622	1.33602	1.62911	not assigned.unknown
GRMZM2G179792	1	67769961	67773953	0.109544	10.4078	13.4902	12.7614	8.57162	lipid metabolism.lipid degradation.lysophospholipases.phospholipase D
GRMZM2G179789	1	67781891	67829835	0.0755525	0.119635	0.0281663	0.0664319	0.0965953	protein.postranslational modification
GRMZM2G412426	1	67842637	67846283	0	0	0	0	0	cell.vesicle transport
GRMZM2G412430	1	67849073	67851238	2.73814	6.33728	5.24948	3.20261	2.55209	not assigned.unknown
GRMZM2G106834	1	67855481	67860850	0	0	0	0	0	not assigned.unknown
GRMZM2G305400	1	67991171	67994092	0.0406627	0	0	0	0	cell.cycle
GRMZM2G082836	1	68107605	68110989	2.29029	19.6397	12.5378	8.88502	7.88967	signalling.G-proteins
GRMZM2G382717	1	68113454	68115168	20.6168	13.8765	14.7889	18.026	18.9123	stress.abiotic.heat
GRMZM2G120587	1	68133177	68136953	0	0.0427695	0.0846537	0.172515	0.257562	protein.degradation.serine protease
GRMZM2G471240	1	68240861	68242656	0	0	0	0	0	development.storage proteins
GRMZM2G062320	1	68318897	68321409	0	0	0	0	0	glycolysis.unclear/dually targeted.phosphoglycerate mutase
AC213048.3_FG002	1	68409825	68410443	0	0	0	0	0	not assigned.unknown
GRMZM5G866758	1	68430653	68436197	31.9611	88.98	65.7008	52.8299	44.2585	secondary metabolism.isoprenoids.mevalonate pathway.acetyl-CoA C-acyltransferase
GRMZM2G003530	1	68435669	68439997	15.6077	4.78134	5.40318	5.9101	6.40276	not assigned.unknown
GRMZM2G077991	1	68543245	68546269	395.389	412.222	522.944	381.911	311.781	protein.synthesis.ribosomal protein.eukaryotic.60S subunit.L37
GRMZM2G077960	1	68554979	68559182	1.54835	3.35027	1.8927	2.18178	2.1754	protein.postranslational modification
GRMZM2G077897	1	68561208	68565155	2.51203	4.89424	2.87415	2.37697	2.42581	not assigned.unknown
GRMZM2G347583	1	68660277	68665995	14.5814	11.6265	11.4616	11.6626	15.7653	not assigned.unknown
GRMZM2G173030	1	68668899	68671460	36.8277	28.0516	34.5864	30.0451	30.9255	not assigned.unknown
GRMZM2G031591	1	68724994	68735949	10.996	8.51546	9.5937	10.4426	9.18096	not assigned.unknown
GRMZM2G070462	1	68861594	68864615	3.01191	4.30461	7.40996	6.39109	4.99163	not assigned.unknown
GRMZM2G022061	1	68876149	68882226	19.7593	22.4399	22.756	23.3475	24.7969	not assigned.unknown
GRMZM2G340286	1	68928212	68929600	0.859929	0.491581	0.55121	1.60337	0.873489	not assigned.unknown
GRMZM2G340279	1	68934651	68937080	0.772006	0.991807	1.10847	1.28886	1.4737	not assigned.unknown
GRMZM2G347808	1	69004993	69012612	7.08563	4.65429	5.90205	7.25497	8.60595	not assigned.unknown
GRMZM2G046480	1	69019789	69025372	1.16114	1.32803	1.06592	0.898668	1.36354	transport.calcium
GRMZM2G085825	1	69086581	69090257	4.56481	5.86472	6.84743	6.66582	6.85048	RNA.processing
GRMZM2G703622	1	69215005	69215407	0	0	0	0	0	not assigned.unknown
GRMZM2G311656	1	69248369	69250255	1.78706	0.440669	0.684562	0.373654	0.354969	not assigned.unknown
GRMZM2G049070	1	69287953	69289335	3.60189	4.38746	3.60345	4.88331	5.5954	protein.degradation.ubiquitin.E3.RING
GRMZM2G703624	1	69374990	69375575	0	0.101454	0.061745	0	0	not assigned.unknown
GRMZM2G062996	1	69400209	69402346	0.202422	0.0337352	0.221568	0	0.0699867	cell wall.pectin*esterases.PME
GRMZM2G111208	1	69541656	69552704	7.47772	6.7274	7.09473	7.83806	8.21561	signalling.phosphinositides.phosphatidylinositol-4-phosphate 5-kinase
GRMZM2G095411	1	69587493	69588228	0	0	0	0	0	not assigned.unknown
GRMZM2G095384	1	69590776	69591701	0	0	0	0	0	not assigned.unknown
GRMZM2G472234	1	69699061	69701037	13.8068	8.39164	5.17451	5.7853	1.77894	not assigned.unknown
GRMZM2G416156	1	69880688	69881823	25.3744	2.64256	5.73422	7.59354	8.25102	not assigned.unknown
GRMZM2G117513	1	69886840	69889367	9.61139	29.1178	20.7152	17.6796	14.9965	not assigned.unknown
GRMZM2G009435	1	70041331	70064322	0.460055	4.12416	4.03157	3.05056	3.7253	lipid metabolism.exotics (steroids, squalene etc).3-beta hydroxysteroid dehydrogenase/isomerase
GRMZM2G149224	1	70155431	70163966	18.3815	13.6173	13.8979	16.6217	18.6417	lipid metabolism.exotics (steroids, squalene etc).3-beta hydroxysteroid dehydrogenase/isomerase
GRMZM2G117222	1	70247094	70254703	29.407	24.0035	25.0932	29.043	25.7887	not assigned.unknown
GRMZM2G048324	1	70424653	70429257	7.00155	14.3875	13.6997	14.2658	13.6774	not assigned.unknown
GRMZM2G123872	1	70503211	70503722	0.944572	0.538311	0.641454	0.888583	1.25151	misc.UDP glucosyl and glucoronyl transferases
GRMZM2G423413	1	70504568	70508249	0	0	0	0	0	protein.synthesis.ribosomal protein.eukaryotic.40S subunit.S8
GRMZM2G123776	1	70516073	70519572	0.0846946	0.0858755	0.0543303	0.054068	0	not assigned.unknown
GRMZM5G828488	1	70564124	70565403	0.214933	0	0.220593	0.190281	0.279102	stress.abiotic
GRMZM2G071688	1	70574744	70577798	3.1558	8.90159	12.9215	15.2484	16.703	not assigned.unknown
GRMZM2G524711	1	70577911	70590132	9.97068	10.132	8.55849	11.2771	11.2764	stress.biotic
GRMZM2G139878	1	70721662	70723841	0.143093	0.534949	0.66666	0.224237	0	not assigned.unknown
GRMZM2G142352	1	70743066	70744451	0	0	0	0	0	not assigned.unknown
GRMZM2G142390	1	70768372	70772461	1.14789	16.8207	7.348	3.21948	1.45535	protein.postranslational modification.kinase.receptor like cytoplasmatic kinase VII
GRMZM2G352708	1	71001025	71001948	0.265064	0.637521	0.877931	0.761317	0.288627	not assigned.unknown
GRMZM2G110076	1	71014909	71020956	8.68113	8.09107	8.15853	9.05599	9.79213	RNA.transcription
GRMZM2G110067	1	71022755	71024504	0	0	0	0	0.257925	RNA.regulation of transcription.GRAS transcription factor family
GRMZM2G110027	1	71065246	71068144	0.296789	0.552785	0.326152	0.646272	0.431244	protein.degradation
GRMZM5G811373	1	71100726	71134500	2.00704	2.14142	2.24536	2.34417	1.77626	RNA.regulation of transcription.unclassified
GRMZM5G862467	1	71144717	71148005	0.0463807	0.359487	0.0214854	0	0.0779348	RNA.regulation of transcription.unclassified
GRMZM2G382774	1	71214501	71215210	14.33	21.4799	11.7522	9.5068	9.48503	not assigned.unknown
GRMZM2G149383	1	71332735	71337389	2.47867	1.31801	3.09824	2.73479	3.0832	not assigned.unknown
GRMZM2G083642	1	71337319	71340351	106.388	149.529	147.766	135.389	142.882	RNA.processing
GRMZM2G004736	1	71533799	71541496	14.5846	12.4014	14.132	15.404	17.7074	not assigned.unknown
GRMZM2G037630	1	71580687	71587233	6.2828	5.35486	6.02249	6.03967	7.52017	RNA.regulation of transcription.CCAAT box binding factor family, HAP2
GRMZM2G341271	1	71589860	71607915	16.7499	15.424	17.4824	16.753	17.2632	protein.degradation.ubiquitin.E3.RING
GRMZM2G341269	1	71608420	71609784	7.99162	7.22807	7.93772	7.74193	7.75576	not assigned.unknown
GRMZM2G035557	1	71794674	71795557	1.4233	19.401	6.26116	7.59096	5.31196	signalling.calcium
GRMZM2G703634	1	71963436	71963858	0	0	0	0	0	not assigned.unknown
GRMZM2G313009	1	71997867	72013905	27.3148	24.0133	24.9163	27.0996	27.4283	not assigned.unknown
GRMZM2G313104	1	72040892	72042056	0	0	0	0	0	not assigned.unknown
GRMZM2G179521	1	72093977	72113326	0.0331198	0	0	0	0	OPP.oxidative PP.G6PD
GRMZM2G135834	1	72223800	72246751	4.53628	1.15431	1.65798	2.17115	2.24701	not assigned.unknown
GRMZM5G812005	1	72331776	72332213	0.484219	0.959491	0.181327	0.117196	0.30538	not assigned.unknown
GRMZM2G060544	1	72351667	72352962	521.121	9.73197	5.64117	5.15654	12.7397	RNA.regulation of transcription.AS2,Lateral Organ Boundaries Gene Family
GRMZM2G060589	1	72384443	72397251	0.151525	0.0908855	0.120035	0.0546205	0	not assigned.unknown
GRMZM5G837210	1	72402215	72403606	0.301845	0.217644	0.0841685	0.202323	0.171861	not assigned.unknown
GRMZM2G360867	1	72412415	72414775	0.0576103	0	0.0150015	0.0523467	0	signalling.G-proteins
AC191589.3_FG003	1	72598204	72598989	0	0	0	0	0	not assigned.unknown
GRMZM2G137502	1	72616536	72618945	0.211811	0	0	0.0502719	0.0663318	RNA.regulation of transcription.C2C2(Zn) DOF zinc finger family
AC177908.3_FG003	1	72690303	72691035	0	0	0	0	0	not assigned.unknown
GRMZM2G096682	1	72701779	72704900	0.51674	1.48678	1.47642	1.16407	1.87793	amino acid metabolism.misc
GRMZM5G866989	1	72722574	72723852	1.46535	0.700477	0.278493	0.308536	0.345043	not assigned.unknown
AC177908.3_FG006	1	72739361	72740252	0	0	0	0	0	not assigned.unknown
GRMZM2G147301	1	72768346	72769771	1.26447	0.272081	0.107332	0.199513	0.21321	not assigned.unknown
AC177908.3_FG002	1	72799952	72805415	3.62169	11.7656	7.93714	6.89412	5.72767	misc.UDP glucosyl and glucoronyl transferases
GRMZM2G391705	1	72842537	72843588	0	0	0	0	0	not assigned.unknown
GRMZM2G351259	1	72883512	72885418	0	0	0	0.0979715	0	misc.cytochrome P450
AC212231.3_FG003	1	73100439	73102278	0	0	0	0	0	not assigned.unknown
AC212231.3_FG002	1	73120754	73121898	0	0	0	0	0	not assigned.unknown
GRMZM2G117930	1	73231454	73232492	0	0	0	0	0	not assigned.unknown
GRMZM2G074946	1	73245937	73251175	0.637802	2.16242	1.19638	1.93178	1.19717	OPP.oxidative PP.6-phosphogluconolactonase
GRMZM2G470442	1	73374219	73376998	110.175	1.9502	17.4653	28.3852	19.9974	misc.cytochrome P450
GRMZM2G172244	1	73379018	73382470	292.849	141.667	190.16	244.09	230.769	not assigned.unknown
GRMZM2G067371	1	73509014	73512106	11.4703	7.88997	5.92812	6.21131	4.23858	protein.targeting.nucleus
GRMZM2G104983	1	73634613	73642065	20.7909	13.4459	14.8034	14.4461	17.0671	not assigned.unknown
GRMZM2G065215	1	73688095	73692153	3.72027	1.77037	2.427	3.62651	4.03957	RNA.regulation of transcription.unclassified
GRMZM2G074102	1	73874116	73880727	18.0817	18.383	17.0656	18.4918	17.1643	not assigned.unknown
GRMZM2G074208	1	73881336	73885872	0	0	0	0	0	RNA.regulation of transcription.putative transcription regulator
GRMZM5G849164	1	73915067	73915800	0	0	0	0	0	not assigned.unknown
GRMZM2G125241	1	73966090	73968225	0.477425	2.26974	2.23466	1.12307	1.0321	misc.beta 1,3 glucan hydrolases
GRMZM2G517730	1	73996489	73997215	0	0	0	0	0	not assigned.unknown
GRMZM2G171022	1	74045965	74048384	2.24161	3.54635	2.48073	3.04373	3.05696	protein.degradation.ubiquitin.E3.SCF.FBOX
GRMZM2G135913	1	74229695	74231694	0	0	0	0	0	development.unspecified
GRMZM2G036629	1	74263334	74264063	0	0	0	2.59639	14.8516	metal handling.binding, chelation and storage
GRMZM2G036543	1	74266618	74279039	18.874	14.29	13.6975	19.7593	19.5207	amino acid metabolism.synthesis.histidine.phosphoribosyl-AMP cyclohydrolase
GRMZM2G036484	1	74279344	74280060	0	0	0	0	0	not assigned.unknown
AC217311.3_FG001	1	74280689	74282117	0	0	0	0	0	not assigned.unknown
GRMZM5G861617	1	74358034	74358346	0	0	0	0	0	not assigned.unknown
GRMZM5G867768	1	74405674	74408407	0	0	0	0	0	not assigned.unknown
GRMZM2G019562	1	74414684	74417072	2.55044	4.49077	3.92592	4.06909	4.06281	lipid metabolism.Phospholipid synthesis.diacylglycerol kinase
GRMZM2G464575	1	74484423	74488354	4.75206	4.15699	4.61826	5.7766	7.129	RNA.regulation of transcription.MYB domain transcription factor family
GRMZM2G464580	1	74490288	74491533	0	0	0	0	0	RNA.regulation of transcription.C2H2 zinc finger family
GRMZM2G107893	1	74543775	74547695	0	0	0	0	0	protein.synthesis.initiation
GRMZM2G086992	1	74603148	74607598	8.88619	18.3503	17.2586	15.6619	16.5863	protein.degradation.ubiquitin
GRMZM2G130121	1	74628404	74631787	13.743	6.15855	7.62114	8.34693	7.51326	stress.abiotic.heat
GRMZM2G304442	1	74710888	74711765	0	0.106062	0.131874	0.376667	1.94404	stress.biotic
GRMZM2G005630	1	74728948	74732821	0	0	0	0	0	not assigned.unknown
GRMZM2G031139	1	74738550	74742423	0	0	0	0	0	not assigned.unknown
GRMZM2G030955	1	74769785	74773054	5.11464	4.14414	4.66107	5.56055	4.86424	protein.degradation.ubiquitin.E3.RING
GRMZM2G030805	1	74775560	74784783	14.8058	12.7561	12.8423	15.2201	16.1618	protein.degradation.ubiquitin
GRMZM2G460988	1	75069775	75072453	1.17846	1.60248	2.05087	2.18633	2.31699	RNA.processing
GRMZM2G042881	1	75142182	75146044	14.3193	21.1666	19.3872	15.9224	17.8905	not assigned.unknown
GRMZM2G043141	1	75147438	75151689	1.66199	0.801488	0.579791	1.06519	0.836695	not assigned.unknown
GRMZM2G425430	1	75169609	75170840	6.13136	3.43588	2.7115	2.5987	2.30363	RNA.regulation of transcription.WRKY domain transcription factor family
GRMZM2G072448	1	75202671	75204264	0	0	0	0	0	protein.degradation.cysteine protease
GRMZM2G165960	1	75316755	75318855	0	0	0	0	0	not assigned.unknown
GRMZM2G032821	1	75396010	75425009	2.41247	6.65831	4.34182	4.86476	6.3879	protein.degradation.ubiquitin.E3.RING
GRMZM5G852170	1	75627691	75627844	2.55504	7.00097	6.42292	3.35657	14.607	not assigned.unknown
GRMZM5G892991	1	75627917	75632263	2.40064	2.39482	1.99574	2.67814	3.53222	development.unspecified
GRMZM2G425736	1	75767865	75774172	7.34829	11.1922	11.5183	13.851	13.6804	not assigned.unknown
GRMZM2G068701	1	75958490	75961166	23.7442	73.7166	93.3165	137.451	186.609	hormone metabolism.auxin.induced-regulated-responsive-activated
GRMZM2G068826	1	76014622	76015776	0	0	0	0	0	not assigned.unknown
GRMZM2G524588	1	76093622	76094637	0	0	0.0322726	0	0	not assigned.unknown
GRMZM2G138710	1	76154570	76156037	0.0497983	0	0	0.0179628	0.0949228	development.unspecified
GRMZM2G075892	1	76234317	76235779	0	0.062627	0	0	0	development.unspecified
GRMZM5G883760	1	76288240	76288796	0	0	0	0	0	RNA.regulation of transcription.C2H2 zinc finger family
GRMZM2G479340	1	76313715	76315398	18.3847	76.7976	37.6133	30.8967	28.7424	development.unspecified
GRMZM2G174708	1	76339506	76340561	1.57184	42.916	18.2293	8.24742	3.75933	cell wall.degradation.pectate lyases and polygalacturonases
GRMZM2G105935	1	76455168	76456265	0.137869	0.164591	0	0	0.225464	development.late embryogenesis abundant
GRMZM2G106026	1	76461943	76462885	0	0.235484	0.428523	0.191078	0	RNA.regulation of transcription.C2H2 zinc finger family
GRMZM2G069176	1	76503934	76504905	0	2.43663	1.16873	0.443785	0.378702	RNA.regulation of transcription.C2H2 zinc finger family
GRMZM2G053757	1	76540238	76541571	0	0	0	0	0	not assigned.unknown
GRMZM2G356556	1	76546876	76547622	0	0	0	0	0	RNA.regulation of transcription.C2H2 zinc finger family
GRMZM2G074138	1	76609644	76615882	7.26976	3.85506	4.7843	4.35788	3.50058	not assigned.unknown
GRMZM2G077316	1	76732178	76733770	63.4112	136.277	112.325	83.7005	70.8581	hormone metabolism.jasmonate.synthesis-degradation.allene oxidase cyclase
GRMZM2G084063	1	76839834	76842563	40.3501	52.4588	44.555	48.6014	54.3167	not assigned.unknown
GRMZM2G084440	1	76848777	76851842	0	0	0.033827	0	0	signalling.G-proteins
GRMZM2G084587	1	76870238	76881940	9.44983	97.1219	51.992	34.5031	28.0495	stress.biotic
GRMZM2G385050	1	76881639	76896223	6.16262	3.63691	4.04572	4.04946	4.711	RNA.transcription
AC190695.3_FG003	1	77024922	77027766	0	0	0	0	0	not assigned.unknown
GRMZM2G157164	1	77032551	77033466	0	0.375132	0.173509	0.462072	0.441906	not assigned.unknown
GRMZM2G044902	1	77144728	77146171	0.516408	1.71921	0.901908	1.56657	1.98148	RNA.regulation of transcription.AS2,Lateral Organ Boundaries Gene Family
GRMZM2G057412	1	77241558	77252224	2.88125	6.25742	3.5457	2.83421	2.77534	not assigned.unknown
GRMZM2G020523	1	77258355	77350693	0	0.182083	0.0476084	0.1382	0	misc.peroxidases
GRMZM2G132794	1	77486343	77488564	1.42549	4.54983	5.71535	6.82967	9.22111	RNA.regulation of transcription.GRAS transcription factor family
GRMZM2G028914	1	77560002	77583193	13.6367	23.4277	17.6205	18.5511	15.233	cell.division.plastid
GRMZM2G053946	1	77797801	77801536	12.3919	8.77309	10.4318	10.4645	10.5361	not assigned.unknown
AC214524.3_FG004	1	77855205	77855448	0	0	0	0	0	not assigned.unknown
GRMZM2G703641	1	77898156	77898888	0	1.50496	0.344444	0.309262	0.222663	not assigned.unknown
GRMZM2G703644	1	77918487	77919300	0	0	0	0	0	not assigned.unknown
GRMZM2G703646	1	77925242	77926055	0	0	0	0	0	not assigned.unknown
AC214524.3_FG002	1	77966984	77969035	0.054139	0	0.041717	0.0174489	0.178105	misc.cytochrome P450
GRMZM5G867996	1	77999892	78000445	0	0	0	0	0	not assigned.unknown
GRMZM2G024175	1	78056861	78057662	0.116029	3.73372	2.2115	2.94202	3.36219	not assigned.unknown
GRMZM2G445187	1	78078479	78085590	0	0	0	0	0	not assigned.unknown
GRMZM2G039000	1	78209380	78210992	0	0	0	0	0	not assigned.unknown
GRMZM2G038991	1	78289320	78290405	0.27579	0.175946	0.602785	0.550906	0.354113	not assigned.unknown
AC199541.4_FG004	1	78327322	78328878	0	0	0	0	0	hormone metabolism.salicylic acid.synthesis-degradation
AC199541.4_FG007	1	78363800	78365445	0.734495	1.94391	1.13884	1.34035	1.07732	misc.UDP glucosyl and glucoronyl transferases
GRMZM2G703650	1	78365893	78366331	0	0	0	0	0	not assigned.unknown
GRMZM2G703651	1	78403152	78404209	0	0	0	0	0	protein.synthesis.initiation
AC199541.4_FG001	1	78406031	78407587	0.34989	19.9755	20.7304	21.7133	20.2211	hormone metabolism.salicylic acid.synthesis-degradation
AC199541.4_FG002	1	78455634	78457190	0	0	0	0	0	hormone metabolism.salicylic acid.synthesis-degradation
GRMZM5G899260	1	78561661	78563524	0.0694715	0	0.0272018	0	0	not assigned.unknown
GRMZM2G423142	1	78562801	78563584	0	0	0	0	0	not assigned.unknown
GRMZM2G058528	1	78645744	78648004	2.60654	0.927978	2.61102	3.33198	3.06975	not assigned.unknown
GRMZM2G050984	1	78701398	78707799	16.4126	36.8982	27.2137	28.5447	26.725	nucleotide metabolism.degradation
GRMZM2G173960	1	78985118	78985617	0	0	0	0	0	not assigned.unknown
GRMZM2G018062	1	78986565	78989272	10.3376	4.979	5.92854	5.98419	6.11701	not assigned.unknown
GRMZM2G060001	1	79005368	79006323	7.14585	3.53325	7.05844	6.89294	6.62031	not assigned.unknown
GRMZM2G148925	1	79067708	79069201	5.39864	11.1718	11.9881	10.9093	11.2309	protein.degradation.cysteine protease
GRMZM2G401328	1	79131876	79132681	30.5209	464.942	141.461	80.1249	38.4585	protein.degradation.cysteine protease
GRMZM2G401374	1	79139397	79140070	3.21297	0.191672	1.11411	0.728285	0.786255	protein.degradation.cysteine protease
GRMZM2G048821	1	79235488	79241264	12.5752	10.6471	12.1113	11.8229	11.9996	nucleotide metabolism.salvage.nucleoside kinases.thymidine kinase
GRMZM2G456401	1	79321853	79323545	0	0	0	0	0	not assigned.unknown
GRMZM5G826389	1	79329024	79331190	0	0	0.172542	0.0961435	0.570495	hormone metabolism.ethylene.synthesis-degradation
GRMZM2G703656	1	79379666	79380557	0	0	0	0	0	not assigned.unknown
GRMZM2G326151	1	79390179	79393524	0	0	0	0	0	protein.targeting.secretory pathway.golgi
GRMZM2G096683	1	79416023	79417869	0	0	0	0.0679202	0.471518	transport.sugars
GRMZM5G882288	1	79435358	79436841	0	0	0	0	0	not assigned.unknown
GRMZM2G396640	1	79440594	79445140	3.63374	1.95992	3.84512	4.15923	4.27498	not assigned.unknown
GRMZM2G088793	1	79470085	79476481	0	0	0	0	0	not assigned.unknown
GRMZM2G017759	1	79489483	79491374	0	0	0	0	0	not assigned.unknown
GRMZM2G044481	1	79703252	79707015	0.0171397	7.69975	14.1364	12.4194	5.59004	hormone metabolism.gibberelin.synthesis-degradation.copalyl diphosphate synthase
GRMZM2G343688	1	79707296	79716189	12.464	13.0213	11.4501	11.7972	10.8835	protein.degradation
GRMZM2G044908	1	79716662	79732328	8.96556	2.24892	3.58697	3.3956	4.09292	RNA.regulation of transcription.unclassified
GRMZM2G045067	1	79733617	79738782	0.26384	0.409703	0.317348	0.185097	0.582079	not assigned.unknown
GRMZM2G045090	1	79752404	79756496	15.1274	22.7951	16.7874	18.3426	17.9711	not assigned.unknown
GRMZM2G179220	1	79839910	79843906	23.3716	18.202	21.2734	28.6349	35.6206	not assigned.unknown
GRMZM2G162690	1	79995736	80000598	11.1143	13.0126	30.1447	29.8259	23.8972	minor CHO metabolism.trehalose.trehalase
GRMZM2G064875	1	80054389	80058323	3.99733	2.50879	3.75256	6.0412	9.06754	cell.organisation
GRMZM2G064804	1	80057726	80085430	14.7429	10.5114	11.1532	10.2375	9.64266	mitochondrial electron transport / ATP synthesis.cytochrome c oxidase
GRMZM2G143703	1	80165186	80168427	4.11525	5.19259	6.41852	6.22316	4.41009	not assigned.unknown
AC194389.3_FG001	1	80181579	80183251	14.4965	9.29062	10.1446	13.5735	12.8514	cell.organisation
GRMZM2G131853	1	80185626	80190186	8.88573	8.40049	9.41905	12.3593	14.6916	protein.postranslational modification
GRMZM2G094126	1	80298491	80298922	0	0	0	0	0	not assigned.unknown
GRMZM2G093962	1	80319757	80322253	7.05311	10.1245	6.04549	7.03536	9.15081	protein.degradation.serine protease
GRMZM2G539790	1	80324571	80328724	0	0	0	0	0	not assigned.unknown
GRMZM2G395950	1	80432001	80432673	0	0	0	0	0	not assigned.unknown
AC211513.3_FG002	1	80478840	80481724	0	0	0	0	0	not assigned.unknown
GRMZM2G060257	1	80500321	80502894	17.5301	39.1403	24.9703	27.7752	28.3264	cell.organisation
GRMZM2G087063	1	80620044	80622805	1.7961	5.59509	6.13244	10.3956	13.5535	not assigned.unknown
GRMZM2G703658	1	80623610	80624309	0	0	0	0	0	not assigned.unknown
GRMZM2G087243	1	80658847	80663899	10.978	5.71521	8.36571	10.7341	9.85077	not assigned.unknown
GRMZM2G389196	1	80664772	80664958	0	0	0	0	0	not assigned.unknown
GRMZM2G087383	1	80682118	80695698	0	0	0	0	0	not assigned.unknown
GRMZM2G049852	1	80766477	80768230	0	0.091402	0	0.196087	0	transport.misc
GRMZM2G477287	1	80865935	80866874	0	0	0	0	0	RNA.regulation of transcription.AP2/EREBP, APETALA2/Ethylene-responsive element binding protein family
GRMZM2G087878	1	80919290	80922769	0.172035	0	0.0302603	0.0194518	0	not assigned.unknown
GRMZM2G434514	1	80952052	80952695	0.645255	4.35385	3.23348	1.42759	0.868802	cell wall.degradation
GRMZM2G133968	1	80960805	80962924	0	0	0.0216117	0	0.100743	not assigned.unknown
GRMZM2G434500	1	80963524	80966109	0	0	0.0502198	0	0	misc.nitrilases, *nitrile lyases, berberine bridge enzymes, reticuline oxidases, troponine reductases
GRMZM2G133943	1	80966365	80972429	3.48957	4.70482	3.237	2.56171	2.51033	lipid metabolism.lipid degradation.lysophospholipases.phospholipase D
AC212979.2_FG006	1	81094070	81098200	0	0	0	0	0	not assigned.unknown
GRMZM2G430039	1	81105264	81107853	11.8317	6.07652	6.01032	6.23503	5.50108	protein.degradation.subtilases
GRMZM2G066441	1	81209598	81213048	0.20996	32.0282	15.2289	11.8193	10.3103	misc.cytochrome P450
GRMZM2G148695	1	81229535	81234888	0	0	0	0	0	protein.degradation.cysteine protease
GRMZM2G145069	1	81315438	81317038	0	0	0	0	0	misc.glutathione S transferases
GRMZM2G137561	1	81424206	81430925	3.33487	5.19141	5.62863	6.58246	6.06559	not assigned.unknown
GRMZM2G025190	1	81440901	81442263	2.10026	197.29	133.849	90.7052	66.9753	misc.glutathione S transferases
GRMZM2G041685	1	81502216	81502995	0	0.378678	0.068714	0.310708	0.453125	misc.glutathione S transferases
GRMZM2G054653	1	81516121	81517310	0.0782165	0.36853	0.522648	0.402884	0.676709	misc.glutathione S transferases
GRMZM2G302373	1	81549492	81550584	0	0.234806	0.238485	0.273625	0.558914	misc.glutathione S transferases
GRMZM2G480439	1	81572257	81573949	0.786215	14.672	12.9214	10.55	9.17466	misc.glutathione S transferases
GRMZM2G178079	1	81578894	81584243	4.09154	15.6168	17.8595	18.05	20.8821	misc.glutathione S transferases
GRMZM2G028821	1	81602812	81603918	0	0	1.2814	6.881	11.8168	misc.glutathione S transferases
GRMZM2G066369	1	81639292	81640765	0.208936	0	0.256621	0.540151	0.29197	misc.glutathione S transferases
GRMZM2G044383	1	81777187	81778493	41.7272	49.5738	30.1584	15.2533	3.37107	misc.glutathione S transferases
GRMZM2G537118	1	81786687	81787169	0	0	0	0	0	not assigned.unknown
GRMZM5G827566	1	81873985	81874293	0	0	0	0	0	not assigned.unknown
GRMZM2G353553	1	81918412	81920944	0.0932885	0.165577	0.185813	0.137092	0.179525	RNA.regulation of transcription.bZIP transcription factor family
GRMZM5G841757	1	81925384	81925933	0	0	0	0	0	not assigned.unknown
GRMZM2G558772	1	81958070	81958623	0	0	0.0617835	0	0	not assigned.unknown
AC205567.3_FG002	1	81960075	81960861	0.245022	0.407239	0.184265	0.161152	0.40913	stress.biotic
GRMZM2G703661	1	81964204	81965033	0	0	0	0	0	not assigned.unknown
GRMZM2G558768	1	81975093	82005092	0	0	0	0	0	not assigned.unknown
GRMZM2G030529	1	82010852	82020375	6.64506	3.47264	3.57429	3.82357	3.91794	misc.oxidases - copper, flavone etc.
GRMZM2G030636	1	82022571	82026326	6.25211	5.61984	4.6937	3.93857	6.29395	not assigned.unknown
GRMZM2G132690	1	82153765	82155014	0	0.699546	2.71473	3.27757	3.68859	DNA.repair
GRMZM2G039312	1	82187886	82190028	0.197966	0.5702	0.129988	0.35049	0.814857	not assigned.unknown
GRMZM2G453403	1	82213770	82214404	0	0	0	0	0	RNA.regulation of transcription.Orphan family
GRMZM5G889520	1	82213772	82215225	0	0	0	0	0	not assigned.unknown
GRMZM2G453438	1	82215947	82218010	0	0	0	0	0	protein.postranslational modification.kinase.receptor like cytoplasmatic kinase VII
GRMZM2G418294	1	82377497	82387540	11.2333	8.54322	8.25253	9.4284	11.3128	RNA.regulation of transcription.Orphan family
GRMZM2G418289	1	82387524	82391931	0	0	0.0740343	0.023626	0.0632499	protein.postranslational modification.kinase.receptor like cytoplasmatic kinase VII
GRMZM2G125304	1	82488504	82496043	0.128475	0.029369	0	0.092241	0	stress.abiotic.heat
GRMZM2G125266	1	82508571	82509915	4.65213	11.5176	5.68436	5.03097	3.86045	secondary metabolism.unspecified
GRMZM2G162292	1	82574795	82577446	21.775	18.8689	14.2654	15.1113	13.7492	not assigned.unknown
GRMZM2G162251	1	82578862	82582627	9.81378	10.3735	9.81751	10.4503	11.3827	not assigned.unknown
AC191042.4_FG001	1	82643069	82673477	0	0	0	0	0	cell.organisation
GRMZM2G039880	1	82676165	82677374	0.114886	0.676309	0.493487	0.515382	0	not assigned.unknown
GRMZM2G506660	1	82701117	82703211	4.88201	3.68123	2.8525	4.33807	5.38107	protein.postranslational modification.kinase.receptor like cytoplasmatic kinase VII
GRMZM2G040068	1	82796738	82798866	0	0	0	0	0	not assigned.unknown
GRMZM2G064466	1	82911724	82917101	0	0	0	0.0161218	0	RNA.regulation of transcription.HB,Homeobox transcription factor family
GRMZM5G867121	1	83009969	83011658	1.14244	0	0	0	0.295621	not assigned.unknown
[truncated: 46,138 more rows]
